# Supplementary material for: Overview of Ethnobotanical–Pharmacological Studies Carried Out on Medicinal Plants from the Serra da Estrela Natural Park: Focus on Their Antidiabetic Potential
Source: MDPI journal article supplement (doi:10.3390/pharmaceutics16040454), 2024-03-25
Supplement: s1 [file s1]

**Supplementary Table S4:** Species of plants in Serra da Estrela Natural Park reported to have anti-diabetic potential.

Category (A): Plant species in NPSE are reportedly used traditionally to treat diabetes. Category (B): Plant species in NPSE with no evidence of traditional use against diabetes but with scientific validation of claimed anti-diabetic effects.

| <b>Category A</b>      |                                                                                                      |
|------------------------|------------------------------------------------------------------------------------------------------|
| <b>Asteraceae</b>      |                                                                                                      |
| 1                      | <i>Arctium minus</i> (Hill) Bernh                                                                    |
| 2                      | <i>Achillea millefolium</i>                                                                          |
| 3                      | <i>Arnica montana</i> subsp. <i>atlantica</i>                                                        |
| 4                      | <i>Calendula arvensis</i>                                                                            |
| 5                      | <i>Chamaemelum nobile</i> (syn. <i>Anthemis nobilis</i> L. or <i>Chamomilla nobilis</i> (L.) Godr. ) |
| 6                      | <i>Cichorium intybus</i>                                                                             |
| 7                      | <i>Dittrichia viscosa</i> subsp. <i>Viscosa</i> (Syn. <i>Inula viscosa</i> )                         |
| 8                      | <i>Galinsoga parviflora</i> (Syn. <i>Galinsoga quadriradiata</i>                                     |
| 9                      | <i>Hypochaeris radicata</i>                                                                          |
| 10                     | <i>Solidago virgaurea</i>                                                                            |
| 11                     | <i>Sonchus asper</i>                                                                                 |
| 12                     | <i>Sonchus oleraceus</i>                                                                             |
| 13                     | <i>Tanacetum vulgare</i>                                                                             |
| <b>Fabaceae</b>        |                                                                                                      |
| 14                     | <i>Pisum sativum</i>                                                                                 |
| 15                     | <i>Pterospartum tridentatum</i>                                                                      |
| 16                     | <i>Retama sphaerocarpa</i>                                                                           |
| 17                     | <i>Trifolium pratense</i> subsp. <i>pratense</i>                                                     |
| <b>Caryophyllaceae</b> |                                                                                                      |
| 18                     | <i>Corrigiola litoralis</i>                                                                          |
| 19                     | <i>Corrigiola telephiifolia</i>                                                                      |
| 20                     | <i>Paronychia argentea</i>                                                                           |
| 21                     | <i>Saponaria officinalis</i>                                                                         |
| 22                     | <i>Stellaria media</i>                                                                               |
| <b>Brassicaceae</b>    |                                                                                                      |
| 23                     | <i>Capsella bursa-pastoris</i>                                                                       |

|                     |                                                                                              |
|---------------------|----------------------------------------------------------------------------------------------|
| 24                  | <i>Raphanus raphanistrum</i> subsp. <i>raphanistrum</i>                                      |
| <b>Apiaceae</b>     |                                                                                              |
| 25                  | <i>Daucus carota</i>                                                                         |
| 26                  | <i>Foeniculum vulgare</i>                                                                    |
| 27                  | <i>Heracleum sphondylium</i>                                                                 |
| <b>Lamiaceae</b>    |                                                                                              |
| 28                  | <i>Acinos alpinus</i>                                                                        |
| 29                  | <i>Clinopodium nepeta</i> subsp. <i>Spruneri</i> (Syn. <i>Calamintha officinalis</i> Moench) |
| 30                  | <i>Lavandula stoechas</i>                                                                    |
| 31                  | <i>Mentha aquatica</i>                                                                       |
| 32                  | <i>Mentha pulegium</i>                                                                       |
| 33                  | <i>Mentha suaveolens</i>                                                                     |
| 34                  | <i>Origanum vulgare</i>                                                                      |
| 35                  | <i>Prunella vulgaris</i>                                                                     |
| 36                  | <i>Salvia verbenaca</i>                                                                      |
| <b>Rosaceae</b>     |                                                                                              |
| 37                  | <i>Agrimonia eupatoria</i>                                                                   |
| 38                  | <i>Crataegus monogyna</i>                                                                    |
| 39                  | <i>Geum urbanum</i>                                                                          |
| 40                  | <i>Potentilla erecta</i>                                                                     |
| 41                  | <i>Prunus avium</i>                                                                          |
| 42                  | <i>Rosa canina</i>                                                                           |
| 43                  | <i>Sorbus aucuparia</i>                                                                      |
| <b>Polygalaceae</b> |                                                                                              |
| 44                  | <i>Polygonum aviculare</i>                                                                   |
| 45                  | <i>Rumex acetosa</i> subsp. <i>acetosa</i>                                                   |
| 46                  | <i>Rumex crispus</i>                                                                         |
| <b>Rubiaceae</b>    |                                                                                              |
| 47                  | <i>Galium aparine</i>                                                                        |
| <b>Cistaceae</b>    |                                                                                              |
| 48                  | <i>Cistus ladanifer</i>                                                                      |
| 49                  | <i>Cistus salviifolius</i>                                                                   |
| <b>Asparagaceae</b> |                                                                                              |

|    |                                           |                         |
|----|-------------------------------------------|-------------------------|
| 50 | <i>Polygonatum odoratum</i>               |                         |
| 51 | <i>Urginea maritima</i>                   |                         |
|    |                                           | <b>Boraginaceae</b>     |
| 52 | <i>Anchusa undulata</i>                   |                         |
|    |                                           | <b>Ericaceae</b>        |
| 53 | <i>Arbutus unedo</i>                      |                         |
| 54 | <i>Vaccinium myrtillus</i>                |                         |
|    |                                           | <b>Scrophulariaceae</b> |
| 55 | <i>Verbascum thapsus</i>                  |                         |
|    |                                           | <b>Geraniaceae</b>      |
| 56 | <i>Geranium robertianum</i>               |                         |
|    |                                           | <b>Papaveraceae</b>     |
| 57 | <i>Chelidonium majus</i>                  |                         |
|    |                                           | <b>Hypericaceae</b>     |
| 58 | <i>Hypericum perforatum</i>               |                         |
|    |                                           | <b>Pteridaceae</b>      |
| 59 | <i>Adiantum capillus-veneris</i> L.       |                         |
|    |                                           | <b>Gentianaceae</b>     |
| 60 | <i>Centaureum erythraea</i>               |                         |
| 61 | <i>Gentiana lutea</i> subsp. <i>lutea</i> |                         |
|    |                                           | <b>Primulaceae</b>      |
| 62 | <i>Anagallis arvensis</i>                 |                         |
|    |                                           | <b>Urticaceae</b>       |
| 63 | <i>Urtica dioica</i>                      |                         |
|    |                                           | <b>Portulacaceae</b>    |
| 64 | <i>Portulaca oleracea</i>                 |                         |
|    |                                           | <b>Malvaceae</b>        |
| 65 | <i>Malva neglecta</i>                     |                         |
|    |                                           | <b>Oleaceae</b>         |
| 66 | <i>Olea europaea</i> var. <i>europaea</i> |                         |
|    |                                           | <b>Solanaceae</b>       |
| 67 | <i>Solanum nigrum</i>                     |                         |
|    |                                           | <b>Amaranthaceae</b>    |

|                   |                                                |                       |
|-------------------|------------------------------------------------|-----------------------|
| 68                | <i>Chenopodium ambrosioides</i>                |                       |
|                   |                                                | <b>Cupressaceae</b>   |
| 69                | <i>Juniperus communis</i>                      |                       |
|                   |                                                | <b>Lycopodiaceae</b>  |
| 70                | <i>Lycopodium clavatum</i>                     |                       |
|                   |                                                | <b>Pinaceae</b>       |
| 71                | <i>Pinus pinaster</i>                          |                       |
|                   |                                                | <b>Thymelaeaceae</b>  |
| 72                | <i>Daphne gnidium</i>                          |                       |
|                   |                                                | <b>Lauraceae</b>      |
| 73                | <i>Laurus nobilis</i>                          |                       |
|                   |                                                | <b>Cannabaceae</b>    |
| 74                | <i>Humulus lupulus</i>                         |                       |
|                   |                                                | <b>Convolvulaceae</b> |
| 75                | <i>Convolvulus arvensis</i>                    |                       |
|                   |                                                | <b>Cucurbitaceae</b>  |
| 76                | <i>Bryonia dioica</i>                          |                       |
|                   |                                                | <b>Moraceae</b>       |
| 77                | <i>Ficus carica</i>                            |                       |
|                   |                                                | <b>Myrtaceae</b>      |
| 78                | <i>Eucalyptus globulus</i>                     |                       |
|                   |                                                | <b>Simaroubaceae</b>  |
| 79                | <i>Ailanthus altissima</i>                     |                       |
|                   |                                                | <b>Taxaceae</b>       |
| 80                | <i>Taxus baccata</i>                           |                       |
|                   |                                                | <b>Verbenaceae</b>    |
| 81                | <i>Verbena officinalis</i>                     |                       |
|                   |                                                | <b>Vitaceae</b>       |
| 82                | <i>Vitis vinifera</i> subsp. <i>sylvestris</i> |                       |
|                   |                                                | <b>Buxaceae</b>       |
| 83                | <i>Buxus sempervirens</i>                      |                       |
| <b>Category B</b> |                                                |                       |

|                        |                                                             |
|------------------------|-------------------------------------------------------------|
| <b>Asteraceae</b>      |                                                             |
| 1                      | <i>Anthemis canescens var aurea (syn. Matricaria aurea)</i> |
| 2                      | <i>Bellis perennis</i>                                      |
| 3                      | <i>Bidens frondosa</i>                                      |
| 4                      | <i>Helichrysum stoechas subsp. stoechas</i>                 |
| 5                      | <i>Lactuca serriola</i>                                     |
| 6                      | <i>Onopordum acanthium subsp. acanthium</i>                 |
| 7                      | <i>Senecio vulgaris</i>                                     |
| 8                      | <i>Tanacetum parthenium</i>                                 |
| <b>Poaceae</b>         |                                                             |
| 9                      | <i>Avena sativa</i>                                         |
| <b>Fabaceae</b>        |                                                             |
| 10                     | <i>Acacia dealbata</i>                                      |
| 11                     | <i>Lupinus angustifolius</i>                                |
| 12                     | <i>Lupinus luteus</i>                                       |
| 13                     | <i>Robinia pseudoacacia</i>                                 |
| 14                     | <i>Trifolium repens</i>                                     |
| <b>Caryophyllaceae</b> |                                                             |
| 15                     | <i>Spergularia rubra</i>                                    |
| <b>Apiaceae</b>        |                                                             |
| 16                     | <i>Eryngium campestre</i>                                   |
| <b>Lamiaceae</b>       |                                                             |
| 17                     | <i>Lavandula pedunculata subsp. pedunculata</i>             |
| 18                     | <i>Melissa officinalis</i>                                  |
| 19                     | <i>Thymus mastichina</i>                                    |
| <b>Rosaceae</b>        |                                                             |
| 20                     | <i>Prunus lusitanica subsp. lusitanica</i>                  |
| <b>Polygalaceae</b>    |                                                             |
| 21                     | <i>Polygonum hydropiper</i>                                 |
| 22                     | <i>Rumex obtusifolius</i>                                   |
| <b>Juncaceae</b>       |                                                             |
| 23                     | <i>Juncus acutus</i>                                        |
| <b>Amaryllidaceae</b>  |                                                             |

|                         |                                                                                                  |
|-------------------------|--------------------------------------------------------------------------------------------------|
| 24                      | <i>Allium victorialis</i>                                                                        |
| 25                      | <i>Narcissus pseudonarcissus</i>                                                                 |
| <b>Asparagaceae</b>     |                                                                                                  |
| 26                      | <i>Muscari comosum</i>                                                                           |
| 27                      | <i>Ruscus aculeatus</i>                                                                          |
| <b>Boraginaceae</b>     |                                                                                                  |
| 28                      | <i>Echium plantagineum</i>                                                                       |
| 29                      | <i>Lithodora prostrata</i>                                                                       |
| <b>Ericaceae</b>        |                                                                                                  |
| 31                      | <i>Erica scoparia</i> subsp. <i>scoparia</i>                                                     |
| 32                      | <i>Vaccinium uliginosum</i>                                                                      |
| <b>Campanulaceae</b>    |                                                                                                  |
| 33                      | <i>Jasione montana</i> var. <i>gracilis</i> (syn. <i>Jasione montana</i> subsp. <i>Montana</i> ) |
| <b>Scrophulariaceae</b> |                                                                                                  |
| 34                      | <i>Verbascum sinuatum</i>                                                                        |
| <b>Geraniaceae</b>      |                                                                                                  |
| 35                      | <i>Geranium purpureum</i>                                                                        |
| 36                      | <i>Geranium pyrenaicum</i> subsp. <i>lusitanicum</i>                                             |
| <b>Papaveraceae</b>     |                                                                                                  |
| 37                      | <i>Papaver dubium</i>                                                                            |
| <b>Hypericaceae</b>     |                                                                                                  |
| 38                      | <i>Hypericum androsaemum</i>                                                                     |
| 39                      | <i>Hypericum humifusum</i>                                                                       |
| <b>Fagaceae</b>         |                                                                                                  |
| 40                      | <i>Castanea sativa</i>                                                                           |
| 41                      | <i>Quercus pyrenaica</i>                                                                         |
| 42                      | <i>Quercus suber</i>                                                                             |
| <b>Caprifoliaceae</b>   |                                                                                                  |
| 43                      | <i>Lonicera periclymenum</i>                                                                     |
| 44                      | <i>Sambucus nigra</i>                                                                            |
| <b>Betulaceae</b>       |                                                                                                  |
| 45                      | <i>Corylus avellana</i>                                                                          |
| <b>Urticaceae</b>       |                                                                                                  |

|    |                                             |                       |
|----|---------------------------------------------|-----------------------|
| 46 | <i>Urtica membranacea</i>                   |                       |
|    |                                             | <b>Malvaceae</b>      |
| 47 | <i>Malva sylvestris</i>                     |                       |
|    |                                             | <b>Lythraceae</b>     |
| 48 | <i>Lythrum salicaria</i>                    |                       |
|    |                                             | <b>Cytinaceae</b>     |
| 49 | <i>Cytinus hypocistis</i>                   |                       |
| 50 | <i>Cytinus hypocistis subsp. hypocistis</i> |                       |
|    |                                             | <b>Pinaceae</b>       |
| 51 | <i>Pinus sylvestris</i>                     |                       |
|    |                                             | <b>Ulmaceae</b>       |
| 52 | <i>Ulmus glabra</i>                         |                       |
|    |                                             | <b>Dioscoreaceae</b>  |
| 53 | <i>Tamus communis</i>                       |                       |
|    |                                             | <b>Oxalidaceae</b>    |
| 54 | <i>Oxalis pes-caprae</i>                    |                       |
|    |                                             | <b>Phytolaccaceae</b> |
| 55 | <i>Phytolacca americana</i>                 |                       |
