# Supplementary material for: Overview of Ethnobotanical–Pharmacological Studies Carried Out on Medicinal Plants from the Serra da Estrela Natural Park: Focus on Their Antidiabetic Potential
Source: MDPI journal article supplement (doi:10.3390/pharmaceutics16040454), 2024-03-25
Supplement: s1 [file s1]

**Supplementary Tables S1:** Description of botanical data and search methodology for Serra da Estrela Natural Park plants in the Flora-on database.

Search results Flora-On; "893 taxa".

Consultation date: "21/04/2023".

Territory: "Mainland Portugal"

USE OF THIS DATA;" IMPLIES REFERENCE TO FLORA-ON."

Link to this search: "[https://flora-on.pt/#1serra\\_da\\_estrela](https://flora-on.pt/#1serra_da_estrela)"

Search carried out: "Site of Community Interest: Serra da Estrela"; "Site of Community Interest: Serra da Estrela".

Collaborators who provided data: "A.Silva;P.V.Araújo; D.T.Holyoak; J.D.Almeida; E.Portela-Pereira; J.Jansen; F.Clamote; M.Porto; A.Carapeto; P.Silveira; J.T.Tavares; P.Beja; P.Pereira; S.Ribeiro; P.Ministro; A.Matos; C.Meireles; E.Marabuto; A.J.Pereira; P.Guillaumeau; J.Pessoa; F.Covelo; AOSP; J.Costa; C.Aguiar; C.Vila-Viçosa; H.Engels; R.Lima; B.Moreira; A.Clemente; A.Francisco; P.R.González; D.Frade; J.M.R.P.†; A.Amado; R.Faria; A.T.Blasi; U.Schwarzer; M.Geraldes; P.Lemos; C.P.Gomes; M.Raposo; C.T.Gomes; J.Farminhão; J.Diamantino; D.Silva; J.Brehm D.Pinto"

Taxa corresponding to the research:

Family; "Taxon"; "Degree of endemism"; "Naturalness"; "Annexes DL 49/2005"; "IUCN category of extinction risk"; "No. Of squares"; "Observers in the site".

|   |                                                                                                            |
|---|------------------------------------------------------------------------------------------------------------|
| 1 | "Alismataceae;"Baldellia alpestris"";"Autóctone"";"Endêmica da Península Ibérica"";"43;"A.Silva J.Jansen " |
| 2 | "Amaranthaceae;"Chenopodium ambrosioides"";"Introduzida"";"85;"A.Silva""                                   |
| 3 | "Amaranthaceae;"Chenopodium botrys"";"Autóctone"";"14;"A.Silva""                                           |
| 4 | "Amaryllidaceae;"Allium massaessylum"";"Autóctone"";"51;"F.Clamote"                                        |
| 5 | "Amaryllidaceae;"Allium scorzonnerifolium"";"Autóctone"";"24;"A.Silva J.Jansen F.Clamote J.D.Almeida""     |

|    |                                                                                                                                                                                                 |
|----|-------------------------------------------------------------------------------------------------------------------------------------------------------------------------------------------------|
| 6  | "Amaryllidaceae;"Allium sphaerocephalon"";"Autóctone"";""";""";""";"133;"E.Portela-Pereira F.Clamote A.Silva D.T.Holyoak P.V.Araújo""                                                           |
| 7  | "Amaryllidaceae;"Allium victorialis"";"Autóctone"";""";""";"NT"";6;"A.Matos A.Silva J.Brehm J.Jansen E.Portela-Pereira M.Porto""                                                                |
| 8  | "Amaryllidaceae;"Leucojum autumnale"";"Autóctone"";""";""";"LC"";253;"A.Silva""                                                                                                                 |
| 9  | "Amaryllidaceae;"Narcissus asturiensis"";"Autóctone"";"Endémica da Península Ibérica"";"Anexo IIAnexo IV"";"NT"";17;"J.Jansen A.Silva P.Silveira A.Carapeto D.T.Holyoak S.Ribeiro M.Porto""     |
| 10 | "Amaryllidaceae;"Narcissus bulbocodium subsp. obesus"";"Autóctone"";"Endémica da Península Ibérica"";"Anexo V"";""";"68;"S.Ribeiro""                                                            |
| 11 | "Amaryllidaceae;"Narcissus bulbocodium subsp. bulbocodium"";"Autóctone"";""";"Anexo V"";""";"240;"F.Clamote A.Silva J.Jansen J.D.Almeida""                                                      |
| 12 | "Amaryllidaceae;"Narcissus bulbocodium"";""";""";"Anexo V"";"LC"";469;"J.T.Tavares A.Carapeto J.Jansen A.Silva D.T.Holyoak A.T.Biasi B.Moreira""                                                |
| 13 | "Amaryllidaceae;"Narcissus calcicola"";"Endémica"";"Endémica de Portugal continental"";"Anexo IIAnexo IV"";"LC"";34;"F.Clamote""                                                                |
| 14 | "Amaryllidaceae;"Narcissus pseudonarcissus subsp. nobilis"";"Autóctone"";"Endémica da Península Ibérica"";"Anexo IIAnexo IV"";"LC"";19;"D.Silva J.Jansen A.Carapeto""                           |
| 15 | "Amaryllidaceae;"Narcissus pseudonarcissus"";""";""";""";"52;"A.Silva""                                                                                                                         |
| 16 | "Amaryllidaceae;"Narcissus rupicola"";"Autóctone"";"Endémica da Península Ibérica"";""";"19;"A.Carapeto M.Porto A.Silva F.Clamote D.T.Holyoak P.V.Araújo""                                      |
| 17 | "Amaryllidaceae;"Narcissus triandrus subsp. pallidulus"";"Autóctone"";"Endémica da Península Ibérica"";"Anexo IV"";""";"77;"A.Silva P.Silveira A.Carapeto D.T.Holyoak A.Francisco""             |
| 18 | "Amaryllidaceae;"Narcissus triandrus subsp. triandrus"";"Autóctone"";"Endémica da Península Ibérica"";"Anexo IV"";""";"120;"E.Portela-Pereira S.Ribeiro""                                       |
| 19 | "Amaryllidaceae;"Narcissus triandrus"";""";""";"Anexo IV"";"LC"";324;"J.Jansen J.T.Tavares M.Porto A.Silva P.Beja A.T.Biasi B.Moreira""                                                         |
| 20 | "Apiaceae;"Angelica major"";"Autóctone"";"Endémica da Península Ibérica"";""";"14;"J.Jansen E.Portela-Pereira A.Silva J.D.Almeida F.Clamote M.Porto P.Pereira C.Aguiar A.Carapeto D.T.Holyoak"" |
| 21 | "Apiaceae;"Angelica sylvestris"";"Autóctone"";""";""";"134;"A.Silva A.Carapeto F.Clamote""                                                                                                      |
| 22 | "Apiaceae;"Anthriscus caucalis"";"Autóctone"";""";""";"95;"J.Jansen""                                                                                                                           |
| 23 | "Apiaceae;"Anthriscus sylvestris"";"Autóctone"";""";""";"39;"A.Silva E.Portela-Pereira P.Pereira F.Clamote""                                                                                    |
| 24 | "Apiaceae;"Apium nodiflorum"";"Autóctone"";""";""";"396;"A.Silva F.Clamote E.Portela-Pereira""                                                                                                  |
| 25 | "Apiaceae;"Carum verticillatum"";"Autóctone"";""";""";"167;"A.Silva J.Jansen""                                                                                                                  |

|    |                                                                                                                                                                                             |
|----|---------------------------------------------------------------------------------------------------------------------------------------------------------------------------------------------|
| 26 | "Apiaceae;""Chaerophyllum temulum"";"Autóctone"";""";""";""";154;""F.Clamote A.Silva E.Portela-Pereira""                                                                                    |
| 27 | "Apiaceae;""Conopodium majus subsp. marizianum"";"Autóctone"";"Endémica da Península Ibérica"";""";""";171;""E.Portela-Pereira A.Silva F.Clamote J.Jansen D.T.Holyoak""                     |
| 28 | "Apiaceae;""Conopodium pyrenaicum"";"Autóctone"";""";""";""";10;""A.Silva""                                                                                                                 |
| 29 | "Apiaceae;""Conopodium subcarneum"";"Autóctone"";"Endémica da Península Ibérica"";""";""";25;""A.Silva""                                                                                    |
| 30 | "Apiaceae;""Daucus carota subsp. carota"";"Autóctone"";""";""";""";375;""E.Portela-Pereira A.Silva""                                                                                        |
| 31 | "Apiaceae;""Daucus carota"";""";""";""";""";702;""A.Silva J.Jansen""                                                                                                                        |
| 32 | "Apiaceae;""Daucus carota subsp. maximus"";"Autóctone"";""";""";""";70;""F.Clamote""                                                                                                        |
| 33 | "Apiaceae;""Daucus durieua"";"Autóctone"";""";""";""";33;""A.Silva""                                                                                                                        |
| 34 | "Apiaceae;""Eryngium campestre"";"Autóctone"";""";""";""";324;""F.Clamote""                                                                                                                 |
| 35 | "Apiaceae;""Eryngium duriaei"";"Autóctone"";"Endémica da Península Ibérica"";""";"LC"";20;""J.Jansen P.V.Araújo F.Clamote A.Silva M.Porto A.Carapeto J.D.Almeida E.Marabuto P.Guillaumeau"" |
| 36 | "Apiaceae;""Eryngium tenue"";"Autóctone"";""";""";""";125;""P.V.Araújo F.Clamote J.T.Tavares""                                                                                              |
| 37 | "Apiaceae;""Ferula communis subsp. catalaunica"";"Autóctone"";"Endémica da Península Ibérica"";""";""";187;""J.Jansen F.Clamote""                                                           |
| 38 | "Apiaceae;""Ferulago capillaris"";"Autóctone"";"Endémica da Península Ibérica"";""";""";15;""J.D.Almeida""                                                                                  |
| 39 | "Apiaceae;""Foeniculum vulgare"";"Autóctone"";""";""";""";582;""F.Clamote E.Portela-Pereira""                                                                                               |
| 40 | "Apiaceae;""Heracleum sphondylium"";""";""";""";""";206;""A.Silva E.Portela-Pereira F.Clamote""                                                                                             |
| 41 | "Apiaceae;""Oenanthe crocata"";"Autóctone"";""";""";""";562;""A.Silva F.Clamote E.Portela-Pereira""                                                                                         |
| 42 | "Apiaceae;""Physospermum cornubiense"";"Autóctone"";""";""";""";82;""A.Silva E.Portela-Pereira""                                                                                            |
| 43 | "Apiaceae;""Thapsia minor"";"Autóctone"";"Endémica da Península Ibérica"";""";""";155;""A.Silva P.Silveira F.Clamote""                                                                      |
| 44 | "Apiaceae;""Thapsia villosa"";""";""";""";""";436;""F.Clamote A.Silva""                                                                                                                     |
| 45 | "Apiaceae;""Tordylium maximum"";"Autóctone"";""";""";""";85;""E.Portela-Pereira""                                                                                                           |
| 46 | "Apiaceae;""Torilis arvensis subsp. purpurea"";"Autóctone"";""";""";""";99;""D.T.Holyoak""                                                                                                  |
| 47 | "Apiaceae;""Torilis arvensis subsp. recta"";"Autóctone"";""";""";""";19;""E.Portela-Pereira""                                                                                               |
| 48 | "Apiaceae;""Torilis japonica"";"Autóctone"";""";""";""";18;""E.Portela-Pereira""                                                                                                            |

|    |                                                                                                                                                                                   |
|----|-----------------------------------------------------------------------------------------------------------------------------------------------------------------------------------|
| 49 | "Apocynaceae;" "Vinca difformis subsp. difformis"; "Autóctone"; "LC"; 216; "A.Silva E.Portela-Pereira"                                                                            |
| 50 | "Apocynaceae;" "Vincetoxicum nigrum"; "Autóctone"; "LC"; 69; "A.Silva E.Portela-Pereira"                                                                                          |
| 51 | "Aquifoliaceae;" "Ilex aquifolium"; "Autóctone"; "LC"; 102; "E.Portela-Pereira A.Silva A.Carapeto J.Pessoa P.R.González F.Clamote J.Costa J.Jansen"                               |
| 52 | "Araceae;" "Arum italicum subsp. italicum"; "Autóctone"; "LC"; 353; "A.Silva F.Clamote"                                                                                           |
| 53 | "Araliaceae;" "Hedera hibernica"; "Autóctone"; "LC"; 270; "A.Silva E.Portela-Pereira"                                                                                             |
| 54 | "Araliaceae;" "Hedera maderensis subsp. iberica"; "Autóctone"; "Endémica da Península Ibérica"; 45; "A.Silva"                                                                     |
| 55 | "Aristolochiaceae;" "Aristolochia paucinervis"; "Autóctone"; "LC"; 380; "F.Clamote J.Jansen P.V.Araújo A.Silva E.Portela-Pereira A.Carapeto"                                      |
| 56 | "Asparagaceae;" "Dipcadi serotinum subsp. serotinum"; "Autóctone"; "LC"; 170; "E.Portela-Pereira"                                                                                 |
| 57 | "Asparagaceae;" "Hyacinthoides hispanica"; "Autóctone"; "LC"; 223; "E.Portela-Pereira A.Silva F.Clamote P.V.Araújo D.T.Holyoak A.Carapeto"                                        |
| 58 | "Asparagaceae;" "Muscari comosum"; "Autóctone"; "LC"; 320; "A.Silva"                                                                                                              |
| 59 | "Asparagaceae;" "Muscari neglectum"; "Autóctone"; "LC"; 92; "A.Silva"                                                                                                             |
| 60 | "Asparagaceae;" "Ornithogalum concinnum"; "Autóctone"; "Endémica da Península Ibérica"; 104; "D.T.Holyoak F.Clamote S.Ribeiro A.Silva J.Jansen P.Silveira P.V.Araújo J.T.Tavares" |
| 61 | "Asparagaceae;" "Ornithogalum pyrenaicum"; "Autóctone"; "LC"; 125; "A.Silva E.Portela-Pereira F.Clamote A.Carapeto P.Pereira E.Marabuto"                                          |
| 62 | "Asparagaceae;" "Paradisea lusitanica"; "Autóctone"; "Endémica da Península Ibérica"; 46; "A.Silva"                                                                               |
| 63 | "Asparagaceae;" "Polygonatum odoratum"; "Autóctone"; "LC"; 109; "A.Silva A.Carapeto F.Clamote"                                                                                    |
| 64 | "Asparagaceae;" "Ruscus aculeatus"; "Autóctone"; "Anexo V"; "LC"; 534; "A.Carapeto A.Silva F.Clamote E.Portela-Pereira M.Porto P.R.González"                                      |
| 65 | "Asparagaceae;" "Scilla autumnalis"; "Autóctone"; "LC"; 268; "A.Silva"                                                                                                            |
| 66 | "Asparagaceae;" "Scilla monophyllos"; "Autóctone"; "LC"; 309; "A.Silva M.Porto P.Beja J.Jansen"                                                                                   |
| 67 | "Asparagaceae;" "Scilla ramburei"; "Autóctone"; "LC"; 69; "A.Silva J.Jansen"                                                                                                      |
| 68 | "Asparagaceae;" "Urginea maritima"; "Autóctone"; "LC"; 461; "A.Silva F.Clamote"                                                                                                   |
| 69 | "Aspleniaceae;" "Asplenium adiantum-nigrum var. adiantum-nigrum"; "Autóctone"; "LC"; 59; "E.Portela-Pereira P.V.Araújo"                                                           |
| 70 | "Aspleniaceae;" "Asplenium adiantum-nigrum"; "Inexistente"; "LC"; 116; "A.Silva"                                                                                                  |

|    |                                                                                                                                                                            |
|----|----------------------------------------------------------------------------------------------------------------------------------------------------------------------------|
| 71 | "Aspleniaceae;"Asplenium billotii"";"Autóctone"";""";""";""";"305;"F.Clamote J.Jansen P.V.Araújo A.Silva J.T.Tavares""                                                     |
| 72 | "Aspleniaceae;"Asplenium onopteris"";"Autóctone"";""";""";""";"338;"P.V.Araújo A.Silva D.T.Holyoak J.T.Tavares F.Clamote J.Jansen J.D.Almeida A.Carapeto""                 |
| 73 | "Aspleniaceae;"Asplenium septentrionale subsp. septentrionale"";"Autóctone"";""";""";"EN"";3;"J.Jansen J.D.Almeida A.Matos P.V.Araújo""                                    |
| 74 | "Aspleniaceae;"Asplenium trichomanes subsp. quadrivalens"";"Autóctone"";""";""";""";"343;"A.Silva P.V.Araújo E.Portela-Pereira A.Carapeto J.Jansen J.D.Almeida F.Clamote"" |
| 75 | "Asteraceae;"Achillea millefolium"";"Autóctone"";""";""";""";"148;"E.Portela-Pereira C.Meireles F.Clamote A.Silva R.Faria D.T.Holyoak P.V.Araújo J.T.Tavares""             |
| 76 | "Asteraceae;"Andryala integrifolia"";"Autóctone"";""";""";""";"630;"F.Clamote A.Silva J.Jansen P.Silveira J.D.Almeida P.V.Araújo M.Porto""                                 |
| 77 | "Asteraceae;"Anthemis arvensis subsp. arvensis"";"Autóctone"";""";""";""";"58;"D.T.Holyoak J.D.Almeida""                                                                   |
| 78 | "Asteraceae;"Anthemis arvensis"";""";""";""";""";"197;"A.Silva J.Jansen""                                                                                                  |
| 79 | "Asteraceae;"Anthemis canescens"";"Autóctone"";""";""";"EN"";8;"A.Silva A.Matos""                                                                                          |
| 80 | "Asteraceae;"Arnica montana subsp. atlantica"";"Autóctone"";""";"Anexo V"";"NT"";42;"AOSP A.Silva J.Jansen""                                                               |
| 81 | "Asteraceae;"Arnoseris minima"";"Autóctone"";""";""";""";"131;"J.Jansen M.Porto A.Silva D.T.Holyoak A.Carapeto F.Clamote P.V.Araújo""                                      |
| 82 | "Asteraceae;"Bellis perennis"";"Autóctone"";""";""";""";"148;"J.Jansen A.Silva""                                                                                           |
| 83 | "Asteraceae;"Bellis sylvestris"";"Autóctone"";""";""";""";"206;"F.Clamote J.D.Almeida P.Beja""                                                                             |
| 84 | "Asteraceae;"Bidens aurea"";"Introduzida"";"Exótica"";""";""";"96;"A.Silva""                                                                                               |
| 85 | "Asteraceae;"Bidens frondosa"";"Introduzida"";"Exótica"";""";""";"273;"E.Portela-Pereira F.Clamote J.T.Tavares""                                                           |
| 86 | "Asteraceae;"Calendula arvensis"";"Autóctone"";""";""";""";"532;"J.Jansen A.Silva F.Clamote""                                                                              |
| 87 | "Asteraceae;"Carduus carpetanus"";"Autóctone"";"Endémica da Península Ibérica"";""";""";"76;"F.Clamote A.Silva D.T.Holyoak P.V.Araújo J.Jansen P.Silveira""                |
| 88 | "Asteraceae;"Carduus platypus subsp. platypus"";"Autóctone"";"Endémica da Península Ibérica"";""";""";"36;"P.V.Araújo A.Silva F.Clamote E.Portela-Pereira""                |
| 89 | "Asteraceae;"Carduus pycnocephalus"";"Introduzida"";""";""";""";"63;"F.Clamote""                                                                                           |
| 90 | "Asteraceae;"Carduus tenuiflorus"";"Autóctone"";""";""";""";"384;"F.Clamote J.Jansen A.Silva E.Portela-Pereira D.T.Holyoak""                                               |
| 91 | "Asteraceae;"Carlina hispanica"";"Autóctone"";""";""";""";"450;"A.Silva F.Clamote J.T.Tavares""                                                                            |

|     |                                                                                                                                                |
|-----|------------------------------------------------------------------------------------------------------------------------------------------------|
| 92  | "Asteraceae;" "Carlina racemosa"; "Autóctone"; "LC"; 230; "F.Clamote"                                                                          |
| 93  | "Asteraceae;" "Centaurea coutinhoi"; "Autóctone"; "Endémica da Península Ibérica"; "LC"; 12; "C.Meireles"                                      |
| 94  | "Asteraceae;" "Centaurea herminii"; "Endémica"; "Endémica de Portugal continental"; "Anexo IIA Anexo IV"; 18; "J.D.Almeida"                    |
| 95  | "Asteraceae;" "Centaurea langeana subsp. langeana"; "Autóctone"; "Endémica da Península Ibérica"; "LC"; 51; "P.Silveira A.Amado"               |
| 96  | "Asteraceae;" "Centaurea nigra subsp. rivularis"; "Autóctone"; "Endémica da Península Ibérica"; 98; "F.Clamote"                                |
| 97  | "Asteraceae;" "Centaurea ornata"; "Endémica da Península Ibérica"; 107; "A.Silva F.Clamote"                                                    |
| 98  | "Asteraceae;" "Centaurea paniculata"; 63; "A.Silva E.Portela-Pereira"                                                                          |
| 99  | "Asteraceae;" "Chamaemelum mixtum"; "Autóctone"; 367; "E.Portela-Pereira P.V.Araújo"                                                           |
| 100 | "Asteraceae;" "Chamaemelum nobile"; "Autóctone"; 195; "P.Silveira F.Clamote A.Silva J.Jansen"                                                  |
| 101 | "Asteraceae;" "Chondrilla juncea"; "Autóctone"; 321; "F.Clamote P.Ministro J.Jansen A.Silva J.T.Tavares"                                       |
| 102 | "Asteraceae;" "Chrysanthemum segetum"; "Introduzida"; "Exótica"; 221; "F.Clamote J.Jansen"                                                     |
| 103 | "Asteraceae;" "Cichorium intybus"; "Autóctone"; 276; "F.Clamote"                                                                               |
| 104 | "Asteraceae;" "Cirsium palustre"; "Autóctone"; 155; "M.Porto A.Silva P.V.Araújo J.T.Tavares P.Silveira F.Clamote E.Portela-Pereira A.Carapeto" |
| 105 | "Asteraceae;" "Cirsium vulgare"; "Autóctone"; 269; "J.T.Tavares J.Jansen J.D.Almeida A.Silva F.Clamote D.T.Holyoak P.Beja M.Porto"             |
| 106 | "Asteraceae;" "Cnicus benedictus"; "Autóctone"; 74; "F.Clamote J.D.Almeida"                                                                    |
| 107 | "Asteraceae;" "Coleostephus myconis"; "Autóctone"; 494; "F.Clamote"                                                                            |
| 108 | "Asteraceae;" "Conyza canadensis"; "Introduzida"; "Exótica"; 79; "A.Silva"                                                                     |
| 109 | "Asteraceae;" "Conyza sumatrensis"; "Introduzida"; "Exótica"; 180; "E.Portela-Pereira F.Clamote"                                               |
| 110 | "Asteraceae;" "Crepis capillaris var. capillaris"; "Autóctone"; 62; "E.Portela-Pereira"                                                        |
| 111 | "Asteraceae;" "Crepis capillaris"; 453; "A.Silva D.T.Holyoak J.Jansen F.Clamote"                                                               |
| 112 | "Asteraceae;" "Crepis lamsanoides"; "Autóctone"; 91; "E.Portela-Pereira A.Silva F.Clamote J.D.Almeida D.T.Holyoak M.Porto"                     |
| 113 | "Asteraceae;" "Crepis vesicaria subsp. taraxacifolia"; "Autóctone"; 399; "A.Silva F.Clamote J.Jansen"                                          |

|     |                                                                                                                                                                                                                                       |
|-----|---------------------------------------------------------------------------------------------------------------------------------------------------------------------------------------------------------------------------------------|
| 114 | "Asteraceae;" " <i>Crupina vulgaris</i> "";" "Autóctone"";" "";" "";" "";" 54;" "A.Silva J.D.Almeida""                                                                                                                                |
| 115 | "Asteraceae;" " <i>Dittrichia viscosa</i> subsp. <i>viscosa</i> "";" "Autóctone"";" "";" "";" "";" 392;" "E.Portela-Pereira F.Clamote M.Porto""                                                                                       |
| 116 | "Asteraceae;" " <i>Doronicum carpetanum</i> subsp. <i>pubescens</i> "";" "Autóctone"";" "Endémica da Península Ibérica"";" "";" "";" 3;" "A.Silva J.Jansen""                                                                          |
| 117 | "Asteraceae;" " <i>Doronicum carpetanum</i> "";" "";" "";" "";" "VU"";" 6;" "E.Portela-Pereira""                                                                                                                                      |
| 118 | "Asteraceae;" " <i>Erigeron karvinskianus</i> "";" "Introduzida"";" "Exótica"";" "";" "";" 141;" "A.Silva F.Clamote J.T.Tavares M.Porto P.Beja""                                                                                      |
| 119 | "Asteraceae;" " <i>Eupatorium cannabinum</i> subsp. <i>cannabinum</i> "";" "Autóctone"";" "";" "";" "";" 184;" "A.Silva""                                                                                                             |
| 120 | "Asteraceae;" " <i>Filago lutescens</i> "";" "";" "";" "";" "";" 20;" "J.D.Almeida""                                                                                                                                                  |
| 121 | "Asteraceae;" " <i>Galactites tomentosus</i> "";" "Autóctone"";" "";" "";" "";" 513;" "F.Clamote J.D.Almeida J.Jansen""                                                                                                               |
| 122 | "Asteraceae;" " <i>Galinsoga parviflora</i> "";" "Introduzida"";" "Exótica"";" "";" "";" 165;" "J.T.Tavares F.Clamote""                                                                                                               |
| 123 | "Asteraceae;" " <i>Helichrysum stoechas</i> subsp. <i>stoechas</i> "";" "Autóctone"";" "";" "";" "";" 375;" "J.D.Almeida A.Silva P.V.Araújo P.Silveira F.Clamote P.Ministro""                                                         |
| 124 | "Asteraceae;" " <i>Hieracium lachenalii</i> "";" "Autóctone"";" "";" "";" "";" 1;" "J.D.Almeida""                                                                                                                                     |
| 125 | "Asteraceae;" " <i>Hieracium laevigatum</i> "";" "Autóctone"";" "";" "";" "";" 3;" "A.Silva""                                                                                                                                         |
| 126 | "Asteraceae;" " <i>Hieracium sabaudum</i> "";" "Autóctone"";" "";" "";" "";" 48;" "A.Silva E.Portela-Pereira""                                                                                                                        |
| 127 | "Asteraceae;" " <i>Hieracium schmidtii</i> "";" "Autóctone"";" "";" "";" "";" 2;" "E.Portela-Pereira A.Silva""                                                                                                                        |
| 128 | "Asteraceae;" " <i>Hispidella hispanica</i> "";" "Autóctone"";" "Endémica da Península Ibérica"";" "";" "";" 102;" "E.Portela-Pereira F.Clamote J.T.Tavares P.V.Araújo J.Jansen A.Silva J.D.Almeida D.T.Holyoak M.Porto A.J.Pereira"" |
| 129 | "Asteraceae;" " <i>Hypochaeris glabra</i> "";" "Autóctone"";" "";" "";" "";" 358;" "J.Jansen J.D.Almeida A.Silva D.T.Holyoak F.Clamote P.Silveira""                                                                                   |
| 130 | "Asteraceae;" " <i>Hypochaeris radicata</i> "";" "Autóctone"";" "";" "";" "";" 498;" "J.Jansen E.Portela-Pereira A.Silva F.Clamote J.D.Almeida D.T.Holyoak M.Porto P.Silveira J.T.Tavares""                                           |
| 131 | "Asteraceae;" " <i>Jurinea humilis</i> "";" "Autóctone"";" "";" "";" "VU"";" 7;" "P.Silveira A.Silva""                                                                                                                                |
| 132 | "Asteraceae;" " <i>Lactuca saligna</i> "";" "Autóctone"";" "";" "";" "";" 32;" "A.Silva""                                                                                                                                             |
| 133 | "Asteraceae;" " <i>Lactuca serriola</i> "";" "Autóctone"";" "";" "";" "";" 358;" "F.Clamote A.Silva E.Portela-Pereira""                                                                                                               |
| 134 | "Asteraceae;" " <i>Lactuca viminea</i> subsp. <i>chondrilliflora</i> "";" "Autóctone"";" "";" "";" "";" 21;" "F.Clamote D.T.Holyoak""                                                                                                 |

|     |                                                                                                                                                                                               |
|-----|-----------------------------------------------------------------------------------------------------------------------------------------------------------------------------------------------|
| 135 | "Asteraceae;""Lactuca viminea subsp. viminea"";""Autóctone"";"""";"""";"""";10;""E.Portela-Pereira J.Jansen""                                                                                 |
| 136 | "Asteraceae;""Lactuca viminea"";"""";"""";"""";"""";178;""A.Silva F.Clamote J.T.Tavares M.Porto""                                                                                             |
| 137 | "Asteraceae;""Lactuca virosa"";""Autóctone"";"""";"""";"""";139;""A.Silva F.Clamote E.Portela-Pereira""                                                                                       |
| 138 | "Asteraceae;""Lapsana communis subsp. communis"";""Autóctone"";"""";"""";"""";206;""A.Silva J.D.Almeida E.Portela-Pereira""                                                                   |
| 139 | "Asteraceae;""Leontodon hispidus subsp. bourgaeanus"";""Autóctone"";""Endémica da Península Ibérica"";"""";""NT"";2;""J.Jansen C.Meireles M.Porto A.Silva P.Pereira D.T.Holyoak J.D.Almeida"" |
| 140 | "Asteraceae;""Leontodon hispidus subsp. hispidus"";""Autóctone"";"""";"""";"""";6;""E.Portela-Pereira""                                                                                       |
| 141 | "Asteraceae;""Leontodon hispidus"";"""";"""";"""";"""";10;""A.Silva F.Clamote""                                                                                                               |
| 142 | "Asteraceae;""Leontodon pyrenaicus subsp. herminicus"";""Endémica"";""Endémica de Portugal continental"";"""";"""";1;""J.D.Almeida""                                                          |
| 143 | "Asteraceae;""Leontodon pyrenaicus subsp. cantabricus"";""Autóctone"";""Endémica da Península Ibérica"";"""";""NT"";2;""J.Jansen A.Silva""                                                    |
| 144 | "Asteraceae;""Leontodon pyrenaicus"";"""";"""";"""";"""";4;""P.Pereira A.Silva J.Jansen M.Porto""                                                                                             |
| 145 | "Asteraceae;""Leontodon taraxacoides subsp. longirostris"";""Autóctone"";"""";"""";"""";253;""A.Silva""                                                                                       |
| 146 | "Asteraceae;""Leontodon taraxacoides subsp. taraxacoides"";""Autóctone"";"""";"""";"""";75;""F.Clamote""                                                                                      |
| 147 | "Asteraceae;""Leontodon taraxacoides"";"""";"""";"""";"""";559;""A.Silva J.D.Almeida""                                                                                                        |
| 148 | "Asteraceae;""Lepidophorum repandum"";""Autóctone"";""Endémica da Península Ibérica"";"""";"""";111;""J.D.Almeida""                                                                           |
| 149 | "Asteraceae;""Leucanthemopsis flaveola subsp. flaveola"";""Autóctone"";""Endémica da Península Ibérica"";"""";"""";15;""A.Silva J.D.Almeida""                                                 |
| 150 | "Asteraceae;""Leucanthemopsis flaveola"";"""";"""";"""";"""";38;""P.V.Araújo A.Carapeto""                                                                                                     |
| 151 | "Asteraceae;""Leucanthemopsis pulverulenta subsp. pulverulenta"";""Autóctone"";""Endémica da Península Ibérica"";"""";"""";22;""A.Silva""                                                     |
| 152 | "Asteraceae;""Leucanthemum sylvaticum"";""Endémica"";""Endémica de Portugal continental"";"""";"""";15;""A.Silva""                                                                            |
| 153 | "Asteraceae;""Logfia gallica"";""Autóctone"";"""";"""";"""";257;""A.Silva J.D.Almeida""                                                                                                       |
| 154 | "Asteraceae;""Logfia minima"";""Autóctone"";"""";"""";"""";189;""D.T.Holyoak E.Portela-Pereira F.Clamote J.Jansen J.D.Almeida A.Silva""                                                       |



|     |                                                                                                                                                                                                                                                     |
|-----|-----------------------------------------------------------------------------------------------------------------------------------------------------------------------------------------------------------------------------------------------------|
| 155 | "Asteraceae;""Onopordum acanthium subsp. acanthium"";""Autóctone"";"""";"""";"""";52;""F.Clamote"""                                                                                                                                                 |
| 156 | "Asteraceae;""Phagnalon saxatile"";""Autóctone"";"""";"""";"""";431;""F.Clamote A.Silva J.D.Almeida"""                                                                                                                                              |
| 157 | "Asteraceae;""Phalacrocarpum oppositifolium"";""Autóctone"";""Endémica da Península Ibérica"";"""";"""";36;""J.Jansen E.Portela-Pereira A.Carapeto F.Clamote P.V.Araújo D.T.Holyoak A.Silva E.Marabuto J.D.Almeida P.Pereira M.Porto A.J.Pereira""" |
| 158 | "Asteraceae;""Picris hieracioides subsp. longifolia"";""Autóctone"";""Endémica da Península Ibérica"";"""";"""";132;""A.Silva E.Portela-Pereira F.Clamote M.Porto P.Beja J.D.Almeida"""                                                             |
| 159 | "Asteraceae;""Pilosella castellana"";""Autóctone"";"""";"""";"""";25;""M.Porto D.T.Holyoak F.Clamote A.Silva J.Jansen P.V.Araújo E.Portela-Pereira"""                                                                                               |
| 160 | "Asteraceae;""Pilosella galiciiana"";""Autóctone"";""Endémica da Península Ibérica"";"""";""DD"";1;""F.Clamote"""                                                                                                                                   |
| 161 | "Asteraceae;""Pilosella pseudopilosella"";""Autóctone"";"""";"""";"""";40;""A.Silva"""                                                                                                                                                              |
| 162 | "Asteraceae;""Pseudognaphalium luteo-album"";""Autóctone"";"""";"""";"""";239;""F.Clamote"""                                                                                                                                                        |
| 163 | "Asteraceae;""Pulicaria odora"";""Autóctone"";"""";"""";"""";278;""A.Silva"""                                                                                                                                                                       |
| 164 | "Asteraceae;""Pulicaria paludosa"";""Autóctone"";"""";"""";"""";305;""F.Clamote"""                                                                                                                                                                  |
| 165 | "Asteraceae;""Rhagadiolus edulis"";""Autóctone"";"""";"""";"""";119;""E.Portela-Pereira"""                                                                                                                                                          |
| 166 | "Asteraceae;""Rhagadiolus stellatus"";""Autóctone"";"""";"""";"""";73;""J.Jansen"""                                                                                                                                                                 |
| 167 | "Asteraceae;""Scorzonera angustifolia var. angustifolia"";""Autóctone"";"""";"""";"""";92;""F.Clamote"""                                                                                                                                            |
| 168 | "Asteraceae;""Senecio jacobaea"";""Autóctone"";"""";"""";"""";400;""F.Clamote"""                                                                                                                                                                    |
| 169 | "Asteraceae;""Senecio lividus"";""Autóctone"";"""";"""";"""";222;""A.Silva M.Porto"""                                                                                                                                                               |
| 170 | "Asteraceae;""Senecio pyrenaicus subsp. caespitosus"";""Endémica"";""Endémica de Portugal continental"";""Anexo IV"";""VU"";2;""J.D.Almeida J.Jansen A.Silva M.Porto F.Clamote P.Pereira P.V.Araújo A.Matos"""                                      |
| 171 | "Asteraceae;""Senecio sylvaticus"";""Autóctone"";"""";"""";"""";218;""J.D.Almeida D.T.Holyoak E.Portela-Pereira M.Porto F.Clamote P.Beja P.V.Araújo A.Silva J.Jansen P.Silveira"""                                                                  |
| 172 | "Asteraceae;""Senecio vulgaris"";""Autóctone"";"""";"""";"""";508;""A.Silva D.T.Holyoak F.Clamote J.D.Almeida P.Beja"""                                                                                                                             |
| 173 | "Asteraceae;""Solidago virgaurea subsp. fallit-tirones"";""Autóctone"";""Endémica da Península Ibérica"";"""";"""";1;""A.Silva F.Clamote J.D.Almeida J.Jansen"""                                                                                    |
| 174 | "Asteraceae;""Solidago virgaurea"";"""";"""";"""";"""";83;""M.Porto P.V.Araújo J.Jansen J.D.Almeida A.Silva E.Portela-Pereira F.Clamote J.T.Tavares"""                                                                                              |
| 175 | "Asteraceae;""Sonchus asper"";"""";"""";"""";"""";321;""F.Clamote A.Silva"""                                                                                                                                                                        |
| 176 | "Asteraceae;""Sonchus oleraceus"";""Autóctone"";"""";"""";"""";557;""A.Silva J.D.Almeida E.Portela-Pereira F.Clamote"""                                                                                                                             |

|     |                                                                                                                                                                                         |
|-----|-----------------------------------------------------------------------------------------------------------------------------------------------------------------------------------------|
| 177 | "Asteraceae;" <i>Tanacetum corymbosum</i> subsp. corymbosum"";"Autóctone"";""";""";""";"25;"P.V.Araújo A.Silva""                                                                        |
| 178 | "Asteraceae;" <i>Tanacetum parthenium</i> "";"Introduzida"";"Exótica"";""";""";"14;"A.Silva""                                                                                           |
| 179 | "Asteraceae;" <i>Tanacetum vulgare</i> "";"Introduzida"";"Exótica"";""";""";"8;"A.Silva F.Clamote""                                                                                     |
| 180 | "Asteraceae;" <i>Taraxacum pinto-silvae</i> "";"Autóctone"";"Endêmica da Península Ibérica"";""";""";"6;"A.Silva""                                                                      |
| 181 | "Asteraceae;" <i>Tolpis barbata</i> -(2)"";"Autóctone"";""";""";""";"406;"F.Clamote A.Silva J.D.Almeida""                                                                               |
| 182 | "Betulaceae;" <i>Alnus glutinosa</i> "";"Autóctone"";""";""";""";"442;"E.Portela-Pereira F.Clamote A.Silva A.Carapeto J.T.Tavares J.Jansen""                                            |
| 183 | "Betulaceae;" <i>Betula pubescens</i> subsp. celtiberica"";"Autóctone"";""";""";""";"60;"E.Portela-Pereira P.Pereira A.Silva""                                                          |
| 184 | "Betulaceae;" <i>Betula pubescens</i> "";""";""";""";""";"92;"A.Silva J.T.Tavares D.T.Holyoak""                                                                                         |
| 185 | "Betulaceae;" <i>Corylus avellana</i> "";"Autóctone"";""";""";""";"94;"A.Silva H.Engels J.T.Tavares""                                                                                   |
| 186 | "Blechnaceae;" <i>Blechnum spicant</i> subsp. spicant"";"Autóctone"";""";""";""";"220;"J.T.Tavares A.Silva M.Porto P.Beja E.Portela-Pereira F.Clamote J.Jansen J.D.Almeida P.V.Araújo"" |
| 187 | "Boraginaceae;" <i>Anchusa undulata</i> "";""";""";""";""";"170;"P.V.Araújo""                                                                                                           |
| 188 | "Boraginaceae;" <i>Echium lusitanicum</i> "";"Autóctone"";"Endêmica da Península Ibérica"";""";""";"102;"A.Silva E.Portela-Pereira P.Pereira S.Ribeiro F.Clamote""                      |
| 189 | "Boraginaceae;" <i>Echium plantagineum</i> "";"Autóctone"";""";""";""";"451;"A.Silva J.Jansen""                                                                                         |
| 190 | "Boraginaceae;" <i>Echium rosulatum</i> subsp. rosulatum"";"Autóctone"";"Endêmica da Península Ibérica"";""";""";"94;"E.Portela-Pereira F.Clamote P.V.Araújo J.Jansen""                 |
| 191 | "Boraginaceae;" <i>Echium rosulatum</i> "";""";""";""";""";"180;"F.Clamote J.T.Tavares A.Silva""                                                                                        |
| 192 | "Boraginaceae;" <i>Lithodora prostrata</i> "";""";""";""";""";"570;"A.Silva P.V.Araújo M.Porto P.Beja A.Francisco F.Clamote""                                                           |
| 193 | "Boraginaceae;" <i>Myosotis discolor</i> "";""";""";""";""";"157;"A.Silva""                                                                                                             |
| 194 | "Boraginaceae;" <i>Myosotis persoonii</i> "";"Autóctone"";""";""";""";"16;"A.Silva D.T.Holyoak J.Jansen""                                                                               |
| 195 | "Boraginaceae;" <i>Myosotis ramosissima</i> "";""";""";""";""";"52;"F.Clamote A.Silva""                                                                                                 |
| 196 | "Boraginaceae;" <i>Myosotis secunda</i> "";"Autóctone"";""";""";""";"53;"P.Silveira E.Portela-Pereira A.Silva""                                                                         |
| 197 | "Boraginaceae;" <i>Myosotis stolonifera</i> "";"Autóctone"";"Endêmica da Península Ibérica"";""";""";"23;"M.Porto A.Silva D.T.Holyoak J.Jansen E.Portela-Pereira P.V.Araújo""           |
| 198 | "Boraginaceae;" <i>Myosotis welwitschii</i> "";"Autóctone"";""";""";""";"87;"F.Clamote""                                                                                                |
| 199 | "Boraginaceae;" <i>Omphalodes nitida</i> "";"Autóctone"";"Endêmica da Península Ibérica"";""";""";"186;"J.D.Almeida A.Silva""                                                           |

|     |                                                                                                                                                                      |
|-----|----------------------------------------------------------------------------------------------------------------------------------------------------------------------|
| 200 | "Boraginaceae;"Pentaglottis sempervirens";"Autóctone";"";"";"";"122;"P.V.Araújo F.Clamote A.Silva E.Portela-Pereira""                                                |
| 201 | "Brassicaceae;"Alliaria petiolata";"Autóctone";"";"";"";"66;"E.Portela-Pereira F.Clamote A.Silva""                                                                   |
| 202 | "Brassicaceae;"Arabidopsis thaliana var. thaliana";"Autóctone";"";"";"";"140;"A.Silva M.Porto J.Jansen P.Silveira P.Beja""                                           |
| 203 | "Brassicaceae;"Arabis glabra";"Autóctone";"";"";"";"10;"A.Silva""                                                                                                    |
| 204 | "Brassicaceae;"Arabis juressi";"Autóctone";"Endémica da Península Ibérica";"";"14;"A.Silva""                                                                         |
| 205 | "Brassicaceae;"Arabis stenocarpa";"Autóctone";"Endémica da Península Ibérica";"";"16;"A.Silva""                                                                      |
| 206 | "Brassicaceae;"Barbarea intermedia";"Autóctone";"";"";"";"17;"A.Silva F.Clamote""                                                                                    |
| 207 | "Brassicaceae;"Biscutella valentina subsp. valentina";"Autóctone";"";"";"";"65;"J.Jansen""                                                                           |
| 208 | "Brassicaceae;"Brassica barraelieri";"Autóctone";"";"";"";"226;"A.Silva F.Clamote P.Beja""                                                                           |
| 209 | "Brassicaceae;"Capsella bursa-pastoris";"Autóctone";"";"";"";"359;"A.Silva D.T.Holyoak P.Beja J.D.Almeida F.Clamote""                                                |
| 210 | "Brassicaceae;"Cardamine castellana";"Autóctone";"Endémica da Península Ibérica";"";"EN";1;"A.Silva""                                                                |
| 211 | "Brassicaceae;"Cardamine flexuosa";"Autóctone";"";"";"";"50;"F.Clamote A.Silva J.Jansen""                                                                            |
| 212 | "Brassicaceae;"Cardamine hirsuta";"Autóctone";"";"";"";"352;"A.Silva F.Clamote J.D.Almeida E.Portela-Pereira P.Beja""                                                |
| 213 | "Brassicaceae;"Cardaria draba subsp. draba";"Autóctone";"";"";"";"17;"D.T.Holyoak""                                                                                  |
| 214 | "Brassicaceae;"Coincya monensis subsp. cheiranthos";"Autóctone";"";"";"";"95;"J.D.Almeida""                                                                          |
| 215 | "Brassicaceae;"Coincya monensis";"";"";"";"166;"A.Silva F.Clamote A.Carapeto A.Francisco""                                                                           |
| 216 | "Brassicaceae;"Coincya monensis subsp. orophila";"Autóctone";"";"";"";"6;"J.Jansen D.T.Holyoak P.Pereira S.Ribeiro E.Portela-Pereira F.Clamote J.D.Almeida A.Silva"" |
| 217 | "Brassicaceae;"Diplotaxis catholica";"Autóctone";"";"";"";"128;"A.Silva""                                                                                            |
| 218 | "Brassicaceae;"Draba muralis";"Autóctone";"";"";"";"59;"A.Silva""                                                                                                    |
| 219 | "Brassicaceae;"Erophila verna";"Autóctone";"";"";"";"52;"D.T.Holyoak F.Clamote M.Porto""                                                                             |
| 220 | "Brassicaceae;"Erysimum lagascae";"Autóctone";"Endémica da Península Ibérica";"";"VU";7;"J.Jansen A.Silva C.Meireles F.Clamote C.Vila-Viçosa""                       |

|     |                                                                                                                                                                                                                        |
|-----|------------------------------------------------------------------------------------------------------------------------------------------------------------------------------------------------------------------------|
| 221 | "Brassicaceae;"Erysimum linifolium"";"Autóctone"";"Endémica da Península Ibérica"";"78;"P.V.Araújo A.Silva""                                                                                                           |
| 222 | "Brassicaceae;"Erysimum merxmuelieri"";"Autóctone"";"Endémica da Península Ibérica"";"5;"J.Jansen A.Silva P.V.Araújo F.Clamote J.D.Almeida E.Portela-Pereira M.Porto C.Vila-Viçosa""                                   |
| 223 | "Brassicaceae;"Hirschfeldia incana"";"Autóctone"";"151;"E.Portela-Pereira""                                                                                                                                            |
| 224 | "Brassicaceae;"Lepidium heterophyllum"";"Autóctone"";"143;"A.Silva F.Clamote D.T.Holyoak""                                                                                                                             |
| 225 | "Brassicaceae;"Lunaria annua"";"Introduzida"";"Exótica"";"24;"F.Clamote""                                                                                                                                              |
| 226 | "Brassicaceae;"Murbeckiella boryi"";"Autóctone"";"Anexo V"";"NT"";"7;"P.Pereira J.Jansen P.Silveira F.Clamote A.Silva P.V.Araújo D.T.Holyoak J.D.Almeida S.Ribeiro A.Carapeto""                                        |
| 227 | "Brassicaceae;"Murbeckiella sousae"";"Endémica"";"Endémica de Portugal continental"";"Anexo IV"";"LC"";"19;"J.Jansen P.Silveira A.Silva A.Carapeto""                                                                   |
| 228 | "Brassicaceae;"Raphanus raphanistrum subsp. raphanistrum"";"Autóctone"";"451;"A.Silva J.D.Almeida""                                                                                                                    |
| 229 | "Brassicaceae;"Rorippa nasturtium-aquaticum"";"Autóctone"";"205;"A.Silva""                                                                                                                                             |
| 230 | "Brassicaceae;"Sisymbrium officinale"";"Autóctone"";"188;"A.Silva F.Clamote""                                                                                                                                          |
| 231 | "Brassicaceae;"Teesdalia coronopifolia"";"Autóctone"";"141;"A.Silva S.Ribeiro""                                                                                                                                        |
| 232 | "Brassicaceae;"Teesdalia nudicaulis"";"Autóctone"";"237;"P.Beja F.Clamote A.Silva P.Silveira J.Jansen D.T.Holyoak""                                                                                                    |
| 233 | "Brassicaceae;"Teesdaliopsis conferta"";"Autóctone"";"Endémica da Península Ibérica"";"NT"";"3;"J.Jansen A.Silva J.Diamantino C.Meireles P.Ministro J.D.Almeida M.Porto A.Matos""                                      |
| 234 | "Buxaceae;"Buxus sempervirens"";"Autóctone"";"EN"";"25;"A.Carapeto""                                                                                                                                                   |
| 235 | "Campanulaceae;"Campanula herminii"";"Autóctone"";"Endémica da Península Ibérica"";"VU"";"2;"F.Clamote A.Carapeto J.Jansen C.Meireles D.T.Holyoak A.Silva M.Porto P.Pereira J.D.Almeida P.V.Araújo E.Portela-Pereira"" |
| 236 | "Campanulaceae;"Campanula lusitanica subsp. lusitanica"";"Autóctone"";"398;"A.Silva D.T.Holyoak P.V.Araújo E.Portela-Pereira F.Clamote M.Porto J.D.Almeida J.T.Tavares""                                               |
| 237 | "Campanulaceae;"Campanula rapunculus"";"Autóctone"";"342;"J.Jansen P.V.Araújo A.Silva F.Clamote E.Portela-Pereira J.D.Almeida""                                                                                        |
| 238 | "Campanulaceae;"Jasione crispa subsp. crispa"";"Autóctone"";"Endémica da Península Ibérica"";"NT"";"3;"J.Jansen A.Carapeto A.Silva P.Pereira F.Clamote S.Ribeiro""                                                     |
| 239 | "Campanulaceae;"Jasione laevis subsp. gredensis"";"Autóctone"";"Endémica da Península Ibérica"";"1;"J.Jansen""                                                                                                         |
| 240 | "Campanulaceae;"Jasione montana var. gracilis"";"Autóctone"";"6;"P.Ministro""                                                                                                                                          |

|     |                                                                                                                                                                                                    |
|-----|----------------------------------------------------------------------------------------------------------------------------------------------------------------------------------------------------|
| 241 | "Campanulaceae;" "Jasione montana" ;"Inexistente" ;"" ;"" ;"" ;649;"E.Portela-Pereira A.Silva F.Clamote P.V.Araújo J.Jansen" ""                                                                    |
| 242 | "Campanulaceae;" "Jasione montana var. montana" ;"Autóctone" ;"" ;"" ;"" ;157;"P.Silveira P.Ministro J.D.Almeida" ""                                                                               |
| 243 | "Campanulaceae;" "Jasione sessiliflora" ;"Autóctone" ;"Endémica da Península Ibérica" ;"" ;"LC" ;39;"J.Jansen A.Silva P.Pereira D.T.Holyoak J.D.Almeida A.Carapeto" ""                             |
| 244 | "Campanulaceae;" "Legousia scabra" ;"Autóctone" ;"" ;"" ;"" ;20;"J.Jansen" ""                                                                                                                      |
| 245 | "Campanulaceae;" "Wahlenbergia hederacea" ;"Autóctone" ;"" ;"" ;"" ;161;"J.Jansen E.Portela-Pereira P.V.Araújo F.Clamote M.Porto A.Silva J.T.Tavares P.Beja D.T.Holyoak P.Silveira A.J.Pereira" "" |
| 246 | "Cannabaceae;" "Humulus lupulus" ;"Autóctone" ;"" ;"" ;"" ;126;"F.Clamote J.Jansen" ""                                                                                                             |
| 247 | "Caprifoliaceae;" "Lonicera periclymenum subsp. hispanica" ;"Autóctone" ;"" ;"" ;"" ;253;"A.Silva E.Portela-Pereira F.Clamote" ""                                                                  |
| 248 | "Caprifoliaceae;" "Lonicera periclymenum subsp. periclymenum" ;"Autóctone" ;"" ;"" ;"" ;127;"A.Silva E.Portela-Pereira F.Clamote" ""                                                               |
| 249 | "Caprifoliaceae;" "Lonicera periclymenum" ;"" ;"" ;"" ;"" ;582;"A.Silva F.Clamote P.V.Araújo M.Porto" ""                                                                                           |
| 250 | "Caprifoliaceae;" "Sambucus nigra" ;"Autóctone" ;"" ;"" ;"" ;315;"F.Clamote J.T.Tavares A.Silva E.Portela-Pereira" ""                                                                              |
| 251 | "Caprifoliaceae;" "Viburnum tinus" ;"Autóctone" ;"" ;"" ;"" ;192;"P.Beja A.Silva J.T.Tavares M.Porto A.Carapeto" ""                                                                                |
| 252 | "Caryophyllaceae;" "Agrostemma githago" ;"Introduzida" ;"Exótica" ;"" ;"" ;74;"A.Silva J.Jansen" ""                                                                                                |
| 253 | "Caryophyllaceae;" "Arenaria montana subsp. montana" ;"Autóctone" ;"" ;"" ;"" ;270;"E.Portela-Pereira P.V.Araújo J.D.Almeida A.Silva F.Clamote D.T.Holyoak J.Jansen P.Silveira" ""                 |
| 254 | "Caryophyllaceae;" "Arenaria querioides subsp. querioides" ;"Autóctone" ;"Endémica da Península Ibérica" ;"" ;"" ;17;"F.Clamote P.V.Araújo A.Silva P.Pereira A.Carapeto J.D.Almeida S.Ribeiro" ""  |
| 255 | "Caryophyllaceae;" "Arenaria querioides" ;"" ;"" ;"" ;"" ;40;"A.Silva P.Silveira D.T.Holyoak J.M.R.P.† A.Carapeto J.Jansen" ""                                                                     |
| 256 | "Caryophyllaceae;" "Cerastium brachypetalum subsp. brachypetalum" ;"Autóctone" ;"" ;"" ;"" ;48;"J.Jansen" ""                                                                                       |
| 257 | "Caryophyllaceae;" "Cerastium diffusum subsp. diffusum" ;"Autóctone" ;"" ;"" ;"" ;37;"F.Clamote" ""                                                                                                |
| 258 | "Caryophyllaceae;" "Cerastium fontanum subsp. vulgare" ;"Autóctone" ;"" ;"" ;"" ;131;"A.Silva D.T.Holyoak J.D.Almeida" ""                                                                          |

|     |                                                                                                                                                                                                                                |
|-----|--------------------------------------------------------------------------------------------------------------------------------------------------------------------------------------------------------------------------------|
| 259 | "Caryophyllaceae;" " <i>Cerastium glomeratum</i> ""; ""Autóctone""; """"; """"; """"; 441; ""A.Silva J.D.Almeida M.Porto""                                                                                                     |
| 260 | "Caryophyllaceae;" " <i>Cerastium ramosissimum</i> ""; ""Autóctone""; """"; """"; """"; 13; ""F.Clamote P.V.Araújo J.Jansen A.Silva D.T.Holyoak A.Carapeto M.Porto P.Beja P.Pereira""                                          |
| 261 | "Caryophyllaceae;" " <i>Chaetonychia cymosa</i> ""; ""Autóctone""; """"; """"; """"; 97; ""A.Silva""                                                                                                                           |
| 262 | "Caryophyllaceae;" " <i>Corrigiola litoralis</i> subsp. <i>perez-larae</i> ""; ""Autóctone""; """"; """"; """"; 8; ""E.Portela-Pereira""                                                                                       |
| 263 | "Caryophyllaceae;" " <i>Corrigiola litoralis</i> ""; """"; """"; """"; """"; 312; ""F.Clamote""                                                                                                                                |
| 264 | "Caryophyllaceae;" " <i>Corrigiola telephiifolia</i> ""; """"; """"; """"; """"; 149; ""A.Silva P.Silveira F.Clamote""                                                                                                         |
| 265 | "Caryophyllaceae;" " <i>Cucubalus baccifer</i> ""; ""Autóctone""; """"; """"; """"; 46; ""F.Clamote J.Jansen A.Silva""                                                                                                         |
| 266 | "Caryophyllaceae;" " <i>Dianthus langeanus</i> ""; ""Autóctone""; ""Endémica da Península Ibérica""; """"; """"; 27; ""F.Clamote""                                                                                             |
| 267 | "Caryophyllaceae;" " <i>Dianthus laricifolius</i> ""; """"; """"; """"; """"; 74; ""A.Silva""                                                                                                                                  |
| 268 | "Caryophyllaceae;" " <i>Dianthus laricifolius</i> subsp. <i>laricifolius</i> ""; ""Autóctone""; ""Endémica da Península Ibérica""; """"; """"; 37; ""A.Silva P.Silveira D.T.Holyoak""                                          |
| 269 | "Caryophyllaceae;" " <i>Dianthus lusitanus</i> ""; ""Autóctone""; """"; """"; """"; 170; ""F.Clamote A.Carapeto P.V.Araújo D.T.Holyoak A.Silva P.Ministro E.Portela-Pereira J.Jansen J.D.Almeida C.T.Gomes P.Beja P.Silveira"" |
| 270 | "Caryophyllaceae;" " <i>Herniaria lusitanica</i> subsp. <i>lusitanica</i> ""; ""Autóctone""; ""Endémica da Península Ibérica""; """"; """"; 22; ""D.T.Holyoak""                                                                |
| 271 | "Caryophyllaceae;" " <i>Herniaria scabrida</i> subsp. <i>scabrida</i> ""; ""Autóctone""; ""Endémica da Península Ibérica""; """"; """"; 67; ""J.D.Almeida D.T.Holyoak""                                                        |
| 272 | "Caryophyllaceae;" " <i>Herniaria scabrida</i> ""; """"; """"; """"; """"; 86; ""A.Silva P.V.Araújo""                                                                                                                          |
| 273 | "Caryophyllaceae;" " <i>Illecebrum verticillatum</i> ""; ""Autóctone""; """"; """"; """"; 277; ""M.Porto P.Silveira D.T.Holyoak F.Clamote P.Guillaumeau""                                                                      |
| 274 | "Caryophyllaceae;" " <i>Minuartia recurva</i> ""; ""Autóctone""; """"; """"; """"; 5; ""J.Jansen A.Silva A.Carapeto J.D.Almeida D.T.Holyoak S.Ribeiro P.V.Araújo M.Porto F.Clamote P.Pereira J.T.Tavares A.J.Pereira P.Beja""  |
| 275 | "Caryophyllaceae;" " <i>Moehringia pentandra</i> ""; ""Autóctone""; """"; """"; """"; 34; ""J.Jansen""                                                                                                                         |
| 276 | "Caryophyllaceae;" " <i>Moehringia trinervia</i> ""; ""Autóctone""; """"; """"; """"; 16; ""J.Jansen A.Silva""                                                                                                                 |
| 277 | "Caryophyllaceae;" " <i>Moenchia erecta</i> subsp. <i>erecta</i> ""; ""Autóctone""; """"; """"; """"; 18; ""D.T.Holyoak""                                                                                                      |
| 278 | "Caryophyllaceae;" " <i>Paronychia argentea</i> ""; """"; """"; """"; """"; 293; ""J.D.Almeida""                                                                                                                               |
| 279 | "Caryophyllaceae;" " <i>Paronychia polygonifolia</i> var. <i>velucensis</i> ""; ""Autóctone""; """"; """"; ""NT""; 5; ""J.Jansen C.Meireles P.V.Araújo A.Silva P.Pereira M.Porto F.Clamote P.Guillaumeau A.Matos""             |

|     |                                                                                                                                                                                                                                              |
|-----|----------------------------------------------------------------------------------------------------------------------------------------------------------------------------------------------------------------------------------------------|
| 280 | "Caryophyllaceae;""Petrorhagia nanteuilii"";""Autóctone"";"""";"""";"""";362;""F.Clamote M.Porto A.Silva D.T.Holyoak J.D.Almeida""                                                                                                           |
| 281 | "Caryophyllaceae;""Polycarpon tetraphyllum subsp. tetraphyllum"";""Autóctone"";"""";"""";"""";192;""F.Clamote""                                                                                                                              |
| 282 | "Caryophyllaceae;""Polycarpon tetraphyllum"";"""";"""";"""";"""";384;""J.D.Almeida""                                                                                                                                                         |
| 283 | "Caryophyllaceae;""Sagina apetala"";""Autóctone"";"""";"""";"""";136;""D.T.Holyoak P.Ministro""                                                                                                                                              |
| 284 | "Caryophyllaceae;""Sagina procumbens"";""Autóctone"";"""";"""";"""";51;""F.Clamote D.T.Holyoak J.D.Almeida A.Silva""                                                                                                                         |
| 285 | "Caryophyllaceae;""Sagina saginoides"";""Autóctone"";"""";"""";""EN"";4;""J.Jansen M.Porto C.Meireles A.Silva A.Matos F.Clamote D.T.Holyoak A.Carapeto""                                                                                     |
| 286 | "Caryophyllaceae;""Saponaria officinalis"";""Autóctone"";"""";"""";"""";247;""A.Clemente A.Silva F.Clamote P.V.Araújo E.Portela-Pereira J.T.Tavares""                                                                                        |
| 287 | "Caryophyllaceae;""Scleranthus annuus"";""Autóctone"";"""";"""";"""";65;""A.Silva D.T.Holyoak""                                                                                                                                              |
| 288 | "Caryophyllaceae;""Scleranthus perennis"";""Autóctone"";"""";"""";""CR"";1;""C.Meireles""                                                                                                                                                    |
| 289 | "Caryophyllaceae;""Scleranthus polycarpus"";""Autóctone"";"""";"""";"""";45;""A.Silva D.T.Holyoak F.Clamote F.Covelo J.D.Almeida""                                                                                                           |
| 290 | "Caryophyllaceae;""Silene acutifolia"";""Autóctone"";""Endémica da Península Ibérica"";"""";"""";75;""J.Jansen A.Silva J.T.Tavares J.D.Almeida P.V.Araújo P.Silveira F.Clamote A.Carapeto E.Portela-Pereira M.Porto""                        |
| 291 | "Caryophyllaceae;""Silene ciliata"";""Autóctone"";"""";"""";""EN"";1;""J.Jansen A.Silva P.Pereira A.Carapeto F.Clamote J.D.Almeida M.Porto A.J.Pereira D.T.Holyoak A.Matos P.V.Araújo""                                                      |
| 292 | "Caryophyllaceae;""Silene coutinhoi"";""Autóctone"";""Endémica da Península Ibérica"";"""";"""";43;""J.Jansen""                                                                                                                              |
| 293 | "Caryophyllaceae;""Silene foetida subsp. foetida"";""Endémica"";""Endémica de Portugal continental"";"""";""EN"";1;""J.Jansen D.T.Holyoak A.Matos P.Pereira P.V.Araújo A.Silva S.Ribeiro J.D.Almeida H.Engels F.Clamote M.Porto A.Carapeto"" |
| 294 | "Caryophyllaceae;""Silene gallica"";""Autóctone"";"""";"""";"""";486;""A.Silva F.Clamote J.D.Almeida""                                                                                                                                       |
| 295 | "Caryophyllaceae;""Silene inaperta subsp. inaperta"";""Autóctone"";"""";"""";"""";61;""A.Silva""                                                                                                                                             |
| 296 | "Caryophyllaceae;""Silene latifolia"";""Autóctone"";"""";"""";"""";418;""F.Clamote E.Portela-Pereira A.Silva J.Jansen J.D.Almeida A.Carapeto D.T.Holyoak M.Porto P.V.Araújo""                                                                |
| 297 | "Caryophyllaceae;""Silene nutans subsp. nutans"";""Autóctone"";"""";"""";"""";141;""E.Portela-Pereira A.Carapeto J.Jansen P.V.Araújo A.Silva""                                                                                               |
| 298 | "Caryophyllaceae;""Silene psammitis subsp. psammitis"";""Autóctone"";""Endémica da Península Ibérica"";"""";"""";26;""A.Silva""                                                                                                              |
| 299 | "Caryophyllaceae;""Silene scabriflora subsp. scabriflora"";""Autóctone"";"""";"""";"""";81;""F.Clamote P.V.Araújo""                                                                                                                          |

|     |                                                                                                                                                                                                  |
|-----|--------------------------------------------------------------------------------------------------------------------------------------------------------------------------------------------------|
| 300 | "Caryophyllaceae;""Silene scabriflora"";"""";"""";"""";"""";260;""A.Silva"""                                                                                                                     |
| 301 | "Caryophyllaceae;""Silene vulgaris subsp. vulgaris"";""Autóctone"";"""";"""";"""";198;""P.V.Araújo A.Silva"""                                                                                    |
| 302 | "Caryophyllaceae;""Spergula arvensis"";""Autóctone"";"""";"""";"""";325;""A.Silva F.Clamote"""                                                                                                   |
| 303 | "Caryophyllaceae;""Spergula morisonii"";""Autóctone"";"""";"""";"""";88;""F.Clamote A.Silva J.Jansen J.D.Almeida P.Silveira D.T.Holyoak F.Covelo"""                                              |
| 304 | "Caryophyllaceae;""Spergularia capillacea"";""Autóctone"";""Endémica da Península Ibérica"";"""";"""";42;""A.Silva F.Clamote"""                                                                  |
| 305 | "Caryophyllaceae;""Spergularia media"";""Autóctone"";"""";"""";"""";33;""P.Beja"""                                                                                                               |
| 306 | "Caryophyllaceae;""Spergularia purpurea"";""Autóctone"";"""";"""";"""";284;""F.Clamote A.Silva D.T.Holyoak"""                                                                                    |
| 307 | "Caryophyllaceae;""Spergularia rubra"";""Autóctone"";"""";"""";"""";28;""F.Clamote"""                                                                                                            |
| 308 | "Caryophyllaceae;""Stellaria alsine"";""Autóctone"";"""";"""";"""";72;""F.Clamote J.Jansen M.Porto"""                                                                                            |
| 309 | "Caryophyllaceae;""Stellaria graminea"";""Autóctone"";"""";"""";"""";96;""A.Silva"""                                                                                                             |
| 310 | "Caryophyllaceae;""Stellaria holostea"";""Autóctone"";"""";"""";"""";133;""A.Silva A.Carapeto J.D.Almeida"""                                                                                     |
| 311 | "Caryophyllaceae;""Stellaria media"";""Autóctone"";"""";"""";"""";465;""M.Porto P.Beja F.Clamote A.Silva J.D.Almeida D.T.Holyoak P.Silveira"""                                                   |
| 312 | "Cistaceae;""Cistus ladanifer subsp. ladanifer"";""Autóctone"";"""";"""";""LC"";444;""F.Clamote"""                                                                                               |
| 313 | "Cistaceae;""Cistus ladanifer"";"""";"""";"""";"""";666;""A.Silva"""                                                                                                                             |
| 314 | "Cistaceae;""Cistus populifolius subsp. populifolius"";""Autóctone"";"""";"""";"""";31;""E.Portela-Pereira"""                                                                                    |
| 315 | "Cistaceae;""Cistus populifolius"";"""";"""";"""";"""";211;""A.Silva M.Porto J.Jansen"""                                                                                                         |
| 316 | "Cistaceae;""Cistus psilosepalus"";""Autóctone"";"""";"""";""LC"";468;""J.D.Almeida A.Silva F.Clamote M.Porto P.Beja P.V.Araújo J.Jansen A.Carapeto"""                                           |
| 317 | "Cistaceae;""Cistus salviifolius"";""Autóctone"";"""";"""";"""";562;""A.Silva M.Porto P.Beja J.Jansen"""                                                                                         |
| 318 | "Cistaceae;""Halimium lasianthum subsp. alyssoides"";""Autóctone"";"""";"""";"""";208;""A.Silva E.Portela-Pereira F.Clamote J.Jansen P.V.Araújo J.D.Almeida P.Silveira D.T.Holyoak A.Carapeto""" |
| 319 | "Cistaceae;""Halimium lasianthum subsp. lasianthum"";""Autóctone"";"""";"""";"""";19;""P.Silveira F.Clamote"""                                                                                   |
| 320 | "Cistaceae;""Halimium lasianthum"";"""";"""";"""";"""";286;""A.Carapeto P.V.Araújo J.T.Tavares A.Silva P.Beja M.Porto F.Clamote"""                                                               |
| 321 | "Cistaceae;""Halimium ocymoides"";""Autóctone"";"""";"""";"""";135;""F.Clamote A.Silva P.Silveira"""                                                                                             |
| 322 | "Cistaceae;""Halimium umbellatum var. umbellatum"";""Autóctone"";"""";"""";"""";40;""A.Silva"""                                                                                                  |



|     |                                                                                                                                                                                                                                                                 |
|-----|-----------------------------------------------------------------------------------------------------------------------------------------------------------------------------------------------------------------------------------------------------------------|
| 323 | "Cistaceae;" " <i>Halimium umbellatum</i> "";"""";"""";"""";"""";216;" "P.V.Araújo A.Silva"""                                                                                                                                                                   |
| 324 | "Cistaceae;" " <i>Halimium umbellatum</i> var. <i>viscosum</i> "";"" " <i>Autóctone</i> "";"""";"""";"""";28;" "J.Jansen"""                                                                                                                                     |
| 325 | "Cistaceae;" " <i>Helianthemum nummularium</i> "";"" " <i>Autóctone</i> "";"""";"""";"""";50;" "P.V.Araújo A.Silva"""                                                                                                                                           |
| 326 | "Cistaceae;" " <i>Tuberaria guttata</i> "";"" " <i>Autóctone</i> "";"""";"""";"""";528;" "D.T.Holyoak F.Clamote A.Silva J.Jansen P.V.Araújo J.D.Almeida"""                                                                                                      |
| 327 | "Cistaceae;" " <i>Tuberaria lignosa</i> "";"" " <i>Autóctone</i> "";"""";"""";"""";194;" "A.Silva J.Jansen"""                                                                                                                                                   |
| 328 | "Colchicaceae;" " <i>Merendera montana</i> "";"" " <i>Autóctone</i> "";"""";"""";"""";118;" "F.Clamote M.Porto A.Carapeto J.Jansen A.Silva P.V.Araújo"""                                                                                                        |
| 329 | "Commelinaceae;" " <i>Tradescantia fluminensis</i> "";"" " <i>Introduzida</i> "";"" " <i>Exótica</i> "";"""";"""";167;" "A.Silva"""                                                                                                                             |
| 330 | "Convolvulaceae;" " <i>Convolvulus arvensis</i> "";"" " <i>Autóctone</i> "";"""";"""";"""";461;" "P.V.Araújo F.Clamote A.Silva D.T.Holyoak"""                                                                                                                   |
| 331 | "Crassulaceae;" " <i>Crassula tillaea</i> "";"" " <i>Autóctone</i> "";"""";"""";"""";293;" "A.Silva J.Jansen"""                                                                                                                                                 |
| 332 | "Crassulaceae;" " <i>Sedum amplexicaule</i> "";"" " <i>Autóctone</i> "";"""";"""";"""";93;" "F.Clamote E.Portela-Pereira"""                                                                                                                                     |
| 333 | "Crassulaceae;" " <i>Sedum andegavense</i> "";"" " <i>Autóctone</i> "";"""";"""";"""";77;" "J.Jansen"""                                                                                                                                                         |
| 334 | "Crassulaceae;" " <i>Sedum anglicum</i> "";"" " <i>Autóctone</i> "";"""";"""";"""";70;" "A.Silva A.Carapeto J.T.Tavares D.Frade J.Jansen E.Portela-Pereira P.V.Araújo"""                                                                                        |
| 335 | "Crassulaceae;" " <i>Sedum arenarium</i> "";"" " <i>Autóctone</i> "";"" " <i>Endémica da Península Ibérica</i> "";"""";"""";236;" "J.Jansen A.Silva J.D.Almeida A.Carapeto D.T.Holyoak F.Clamote P.Silveira F.Covelo P.V.Araújo"""                              |
| 336 | "Crassulaceae;" " <i>Sedum brevifolium</i> "";"" " <i>Autóctone</i> "";"""";"""";"""";282;" "A.Silva A.Carapeto J.Jansen D.T.Holyoak M.Porto J.D.Almeida F.Clamote E.Portela-Pereira P.Silveira P.Ministro J.T.Tavares P.Beja S.Ribeiro P.Pereira P.V.Araújo""" |
| 337 | "Crassulaceae;" " <i>Sedum forsterianum</i> "";"" " <i>Autóctone</i> "";"""";"""";"""";301;" "A.Silva P.V.Araújo F.Clamote E.Portela-Pereira J.D.Almeida"""                                                                                                     |
| 338 | "Crassulaceae;" " <i>Sedum hirsutum</i> subsp. <i>hirsutum</i> "";"" " <i>Autóctone</i> "";"""";"""";"""";259;" "P.V.Araújo M.Porto A.Carapeto E.Portela-Pereira J.D.Almeida F.Clamote P.Ministro"""                                                            |
| 339 | "Crassulaceae;" " <i>Sedum hirsutum</i> "";"""";"""";"""";"""";404;" "A.Silva D.T.Holyoak F.Clamote M.Porto J.T.Tavares A.Carapeto E.Portela-Pereira J.Jansen"""                                                                                                |
| 340 | "Crassulaceae;" " <i>Sedum maireanum</i> "";"" " <i>Autóctone</i> "";"""";"""";"""";19;" "A.Silva J.Jansen S.Ribeiro"""                                                                                                                                         |
| 341 | "Crassulaceae;" " <i>Sedum pedicellatum</i> subsp. <i>lusitanicum</i> "";"" " <i>Autóctone</i> "";"" " <i>Endémica da Península Ibérica</i> "";"""";"""";6;" "C.Meireles A.Matos J.Jansen M.Porto"""                                                            |
| 342 | "Crassulaceae;" " <i>Sedum pedicellatum</i> "";"""";"""";"""";"" " <i>LC</i> "";20;" "D.T.Holyoak J.Jansen"""                                                                                                                                                   |
| 343 | "Crassulaceae;" " <i>Sedum pruinaum</i> "";"" " <i>Autóctone</i> "";"" " <i>Endémica da Península Ibérica</i> "";"""";"""";37;" "A.Silva M.Porto E.Portela-Pereira F.Clamote"""                                                                                 |

|     |                                                                                                                                                                                        |
|-----|----------------------------------------------------------------------------------------------------------------------------------------------------------------------------------------|
| 344 | "Crassulaceae;" "Umbilicus rupestris"; "Autóctone"; " "; " "; " "; " "; 582; "F.Clamote D.T.Holyoak E.Portela-Pereira P.V.Araújo A.Silva J.D.Almeida A.Carapeto J.Jansen P.Ministro" " |
| 345 | "Cucurbitaceae;" "Bryonia dioica"; "Autóctone"; " "; " "; " "; " "; 458; "J.Jansen J.D.Almeida A.Silva E.Portela-Pereira F.Clamote" "                                                  |
| 346 | "Cupressaceae;" "Juniperus communis subsp. alpina"; "Autóctone"; " "; " "; " "; " "; 1; "J.Jansen J.D.Almeida" "                                                                       |
| 347 | "Cupressaceae;" "Juniperus communis"; " "; " "; " "; " "; " "; 8; "A.Carapeto D.T.Holyoak A.Silva P.V.Araújo F.Clamote E.Portela-Pereira P.Pereira S.Ribeiro P.Beja R.Lima" "          |
| 348 | "Cyperaceae;" "Carex binervis"; "Autóctone"; " "; " "; " "; " "; 35; "A.Silva F.Covelo" "                                                                                              |
| 349 | "Cyperaceae;" "Carex demissa"; "Autóctone"; " "; " "; " "; " "; 32; "J.Jansen" "                                                                                                       |
| 350 | "Cyperaceae;" "Carex depauperata"; "Autóctone"; " "; " "; " "; " "; 2; "J.Jansen" "                                                                                                    |
| 351 | "Cyperaceae;" "Carex distachya"; "Autóctone"; " "; " "; " "; " "; 34; "A.Silva" "                                                                                                      |
| 352 | "Cyperaceae;" "Carex echinata"; "Autóctone"; " "; " "; " "; " "; 36; "J.Jansen A.Silva P.V.Araújo" "                                                                                   |
| 353 | "Cyperaceae;" "Carex elata subsp. reuteriana"; "Autóctone"; "Endêmica da Península Ibérica"; " "; " "; " "; 95; "D.T.Holyoak E.Portela-Pereira P.V.Araújo A.Silva J.T.Tavares" "       |
| 354 | "Cyperaceae;" "Carex furva"; "Autóctone"; "Endêmica da Península Ibérica"; " "; "CR"; 1; "P.Pereira A.Silva J.Jansen" "                                                                |
| 355 | "Cyperaceae;" "Carex laevigata"; "Autóctone"; " "; " "; " "; " "; 79; "A.Silva J.Jansen E.Portela-Pereira" "                                                                           |
| 356 | "Cyperaceae;" "Carex leporina"; "Autóctone"; " "; " "; " "; " "; 77; "A.Carapeto P.Pereira J.Jansen M.Porto A.Silva D.T.Holyoak F.Clamote" "                                           |
| 357 | "Cyperaceae;" "Carex muricata subsp. pairae"; "Autóctone"; " "; " "; " "; " "; 66; "A.Silva J.Jansen E.Portela-Pereira" "                                                              |
| 358 | "Cyperaceae;" "Carex nigra"; "Autóctone"; " "; " "; " "; " "; 3; "A.Silva F.Clamote P.Ministro" "                                                                                      |
| 359 | "Cyperaceae;" "Carex remota"; "Autóctone"; " "; " "; " "; " "; 16; "A.Silva" "                                                                                                         |
| 360 | "Cyperaceae;" "Cyperus eragrostis"; "Introduzida"; "Exótica"; " "; " "; " "; 309; "F.Clamote" "                                                                                        |
| 361 | "Cyperaceae;" "Cyperus longus"; "Autóctone"; " "; " "; " "; " "; 319; "A.Silva E.Portela-Pereira F.Clamote" "                                                                          |
| 362 | "Cyperaceae;" "Eleocharis multicaulis"; "Autóctone"; " "; " "; " "; " "; 68; "J.Jansen" "                                                                                              |
| 363 | "Cyperaceae;" "Eleocharis palustris subsp. palustris"; "Autóctone"; " "; " "; " "; " "; 38; "A.Silva" "                                                                                |
| 364 | "Cyperaceae;" "Eriophorum angustifolium"; "Autóctone"; " "; " "; " "; "VU"; 13; "J.Jansen" "                                                                                           |
| 365 | "Cyperaceae;" "Isolepis setacea"; "Autóctone"; " "; " "; " "; " "; 54; "A.Silva" "                                                                                                     |
| 366 | "Cyperaceae;" "Scirpoides holoschoenus"; "Autóctone"; " "; " "; " "; " "; 444; "A.Silva" "                                                                                             |
| 367 | "Cytinaceae;" "Cytinus hypocistis subsp. hypocistis"; "Autóctone"; " "; " "; " "; " "; 5; "D.T.Holyoak" "                                                                              |
| 368 | "Cytinaceae;" "Cytinus hypocistis"; " "; " "; " "; " "; " "; 127; "A.Silva M.Porto" "                                                                                                  |

|     |                                                                                                                                                                                                                       |
|-----|-----------------------------------------------------------------------------------------------------------------------------------------------------------------------------------------------------------------------|
| 369 | "Dennstaedtiaceae;""Pteridium aquilinum subsp. aquilinum"";""Autóctone"";"""";"""";"""";581;""E.Portela-Pereira A.Silva P.V.Araújo A.Carapeto P.Beja F.Clamote J.Jansen J.D.Almeida D.T.Holyoak J.T.Tavares M.Porto"" |
| 370 | "Dioscoreaceae;""Tamus communis"";""Autóctone"";"""";"""";"""";465;""E.Portela-Pereira F.Clamote J.Jansen A.Silva J.D.Almeida""                                                                                       |
| 371 | "Droseraceae;""Drosera rotundifolia"";""Autóctone"";"""";"""";"""";37;""A.Silva P.Pereira P.Ministro H.Engels J.Jansen M.Porto P.V.Araújo J.D.Almeida""                                                               |
| 372 | "Dryopteridaceae;""Dryopteris affinis subsp. affinis"";""Autóctone"";"""";"""";"""";81;""E.Portela-Pereira P.Ministro""                                                                                               |
| 373 | "Dryopteridaceae;""Dryopteris affinis"";"""";"""";"""";"""";227;""P.V.Araújo P.Pereira J.T.Tavares J.Jansen F.Clamote""                                                                                               |
| 374 | "Dryopteridaceae;""Dryopteris dilatata"";""Autóctone"";"""";"""";"""";36;""A.Silva E.Portela-Pereira""                                                                                                                |
| 375 | "Dryopteridaceae;""Dryopteris expansa"";""Autóctone"";"""";"""";""CR"";2;""A.Matos J.Jansen A.Silva P.V.Araújo""                                                                                                      |
| 376 | "Dryopteridaceae;""Dryopteris filix-mas"";""Autóctone"";"""";"""";"""";61;""E.Portela-Pereira A.Silva F.Clamote J.Jansen J.D.Almeida P.Beja P.V.Araújo""                                                              |
| 377 | "Dryopteridaceae;""Dryopteris oreades"";""Autóctone"";"""";"""";""VU"";2;""A.Silva J.Jansen D.T.Holyoak P.Pereira F.Clamote A.Matos P.Ministro E.Portela-Pereira P.V.Araújo A.Carapeto""                              |
| 378 | "Dryopteridaceae;""Polystichum setiferum"";""Autóctone"";"""";"""";"""";207;""A.Silva E.Portela-Pereira A.Carapeto F.Clamote J.T.Tavares J.Jansen J.D.Almeida P.V.Araújo P.Ministro""                                 |
| 379 | "Elatinaceae;""Elatine brochonii"";""Autóctone"";"""";"""";""NT"";29;""F.Clamote D.Pinto""                                                                                                                            |
| 380 | "Ericaceae;""Arbutus unedo"";""Autóctone"";"""";"""";"""";451;""A.Silva F.Clamote J.Jansen M.Porto""                                                                                                                  |
| 381 | "Ericaceae;""Calluna vulgaris"";""Autóctone"";"""";"""";"""";467;""J.Jansen A.Carapeto A.Silva M.Porto P.V.Araújo D.T.Holyoak P.Beja E.Portela-Pereira R.Lima F.Clamote J.T.Tavares""                                 |
| 382 | "Ericaceae;""Erica arborea"";""Autóctone"";"""";"""";"""";410;""A.Silva P.V.Araújo J.Jansen A.Carapeto E.Portela-Pereira D.T.Holyoak J.D.Almeida F.Clamote M.Porto""                                                  |
| 383 | "Ericaceae;""Erica australis subsp. australis"";""Autóctone"";"""";"""";"""";257;""A.Carapeto A.Silva F.Clamote D.T.Holyoak M.Porto P.Beja E.Portela-Pereira J.Jansen E.Marabuto P.Silveira P.V.Araújo P.Ministro""   |
| 384 | "Ericaceae;""Erica ciliaris"";""Autóctone"";"""";"""";"""";183;""A.Silva""                                                                                                                                            |
| 385 | "Ericaceae;""Erica cinerea"";""Autóctone"";"""";"""";"""";230;""A.Silva A.Carapeto""                                                                                                                                  |
| 386 | "Ericaceae;""Erica lusitanica"";""Autóctone"";"""";"""";"""";146;""A.Silva P.Beja E.Portela-Pereira""                                                                                                                 |
| 387 | "Ericaceae;""Erica scoparia subsp. scoparia"";""Autóctone"";"""";"""";"""";220;""A.Silva""                                                                                                                            |
| 388 | "Ericaceae;""Erica tetralix"";""Autóctone"";"""";"""";"""";70;""M.Porto E.Portela-Pereira J.D.Almeida J.Jansen""                                                                                                      |

|     |                                                                                                                                                                                                         |
|-----|---------------------------------------------------------------------------------------------------------------------------------------------------------------------------------------------------------|
| 389 | "Ericaceae;" "Erica umbellata" ";" ";" ";" ";" ";" ";" ;385;" "D.T.Holyoak M.Porto A.Silva F.Clamote P.Silveira" ""                                                                                     |
| 390 | "Ericaceae;" "Monotropa hypopitys" ";" "Autóctone" ";" ";" ";" ";" "VU" ;17;" "P.V.Araújo A.Silva J.Pessoa J.Jansen J.Farminhão" ""                                                                     |
| 391 | "Ericaceae;" "Vaccinium myrtillus" ";" "Autóctone" ";" ";" ";" ";" ";" ;23;" "A.Silva" ""                                                                                                               |
| 392 | "Ericaceae;" "Vaccinium uliginosum" ";" "Autóctone" ";" ";" ";" ";" ";" "VU" ;1;" "A.Silva P.Pereira M.Porto P.V.Araújo P.Ministro" ""                                                                  |
| 393 | "Euphorbiaceae;" "Euphorbia amygdaloides subsp. amygdaloides" ";" "Autóctone" ";" ";" ";" ";" ";" ;151;" "F.Clamote A.Silva" ""                                                                         |
| 394 | "Euphorbiaceae;" "Euphorbia characias subsp. characias" ";" "Autóctone" ";" ";" ";" ";" ";" ;136;" "P.Silveira" ""                                                                                      |
| 395 | "Euphorbiaceae;" "Euphorbia dulcis" ";" "Autóctone" ";" ";" ";" ";" ";" ;73;" "J.Jansen" ""                                                                                                             |
| 396 | "Euphorbiaceae;" "Euphorbia helioscopia subsp. helioscopia" ";" "Autóctone" ";" ";" ";" ";" ";" ;254;" "P.Beja" ""                                                                                      |
| 397 | "Euphorbiaceae;" "Euphorbia oxyphylla" ";" "Autóctone" ";" "Endémica da Península Ibérica" ";" ";" ";" ;81;" "F.Clamote J.T.Tavares P.Silveira" ""                                                      |
| 398 | "Euphorbiaceae;" "Euphorbia peplus" ";" ";" ";" ";" ";" ";" ;272;" "P.Beja" ""                                                                                                                          |
| 399 | "Euphorbiaceae;" "Mercurialis ambigua" ";" "Autóctone" ";" ";" ";" ";" ";" ;402;" "A.Silva F.Clamote" ""                                                                                                |
| 400 | "Fabaceae;" "Acacia dealbata" ";" "Introduzida" ";" "Exótica" ";" ";" ";" ;309;" "A.Silva E.Portela-Pereira F.Clamote A.Carapeto" ""                                                                    |
| 401 | "Fabaceae;" "Acacia melanoxylon" ";" "Introduzida" ";" "Exótica" ";" ";" ";" ;144;" "A.Silva" ""                                                                                                        |
| 402 | "Fabaceae;" "Adenocarpus complicatus" ";" "Autóctone" ";" ";" ";" ";" ";" ;148;" "C.Meireles P.Pereira S.Ribeiro F.Clamote J.Jansen J.T.Tavares M.Porto" ""                                             |
| 403 | "Fabaceae;" "Adenocarpus hispanicus subsp. gredensis" ";" "Autóctone" ";" "Endémica da Península Ibérica" ";" ";" "EN" ;3;" "C.P.Gomes C.Meireles S.Ribeiro A.Silva A.Carapeto J.Jansen J.D.Almeida" "" |
| 404 | "Fabaceae;" "Adenocarpus lainzii" ";" "Autóctone" ";" "Endémica da Península Ibérica" ";" ";" ";" ;152;" "S.Ribeiro" ""                                                                                 |
| 405 | "Fabaceae;" "Anthyllis vulneraria subsp. gandogerii" ";" "Autóctone" ";" ";" ";" ";" ";" ;24;" "P.V.Araújo" ""                                                                                          |
| 406 | "Fabaceae;" "Astragalus glycyphyllos" ";" "Autóctone" ";" ";" ";" ";" "EN" ;3;" "A.Silva J.D.Almeida A.Matos" ""                                                                                        |
| 407 | "Fabaceae;" "Astragalus pelecinus subsp. pelecinus" ";" "Autóctone" ";" ";" ";" ";" ";" ;150;" "J.Jansen" ""                                                                                            |
| 408 | "Fabaceae;" "Coronilla repanda subsp. dura" ";" "Autóctone" ";" ";" ";" ";" ";" ;85;" "J.Jansen" ""                                                                                                     |
| 409 | "Fabaceae;" "Cytisus grandiflorus subsp. grandiflorus" ";" "Autóctone" ";" ";" ";" ";" ";" ;68;" "E.Portela-Pereira A.Silva D.T.Holyoak" ""                                                             |

|     |                                                                                                                                                                                                                                                              |
|-----|--------------------------------------------------------------------------------------------------------------------------------------------------------------------------------------------------------------------------------------------------------------|
| 410 | "Fabaceae;"Cytisus grandiflorus"";""";""";""";""";"136;"A.Silva P.V.Araújo J.Jansen P.Silveira"""                                                                                                                                                            |
| 411 | "Fabaceae;"Cytisus multiflorus"";"Autóctone"";"Endémica da Península Ibérica"";""";""";"301;"F.Clamote D.T.Holyoak A.Silva P.V.Araújo E.Portela-Pereira M.Porto J.Jansen A.Carapeto"""                                                                       |
| 412 | "Fabaceae;"Cytisus oromediterraneus"";"Autóctone"";""";""";""";"4;"J.Jansen J.D.Almeida A.Silva E.Portela-Pereira F.Clamote A.Carapeto D.T.Holyoak"""                                                                                                        |
| 413 | "Fabaceae;"Cytisus scoparius subsp. scoparius"";"Autóctone"";""";""";""";"149;"A.Silva"""                                                                                                                                                                    |
| 414 | "Fabaceae;"Cytisus striatus"";"Autóctone"";""";""";""";"396;"P.V.Araújo A.Silva J.T.Tavares E.Portela-Pereira J.Jansen A.Carapeto J.D.Almeida D.T.Holyoak"""                                                                                                 |
| 415 | "Fabaceae;"Echinospartum ibericum"";"Autóctone"";"Endémica da Península Ibérica"";""";""";"36;"P.Guillaumeau E.Portela-Pereira J.D.Almeida A.Silva P.Pereira A.Carapeto F.Clamote P.Silveira J.T.Tavares D.T.Holyoak M.Porto J.Jansen P.V.Araújo C.Aguiar""" |
| 416 | "Fabaceae;"Erophaca baetica subsp. baetica"";"Autóctone"";""";""";""";"226;"J.Costa"""                                                                                                                                                                       |
| 417 | "Fabaceae;"Genista anglica"";"Autóctone"";""";""";""";"23;"E.Portela-Pereira M.Porto S.Ribeiro A.Silva A.Carapeto J.Jansen D.T.Holyoak J.D.Almeida M.Geraldes F.Clamote P.V.Araújo"""                                                                        |
| 418 | "Fabaceae;"Genista cinerascens"";"Autóctone"";"Endémica da Península Ibérica"";""";""";"7;"J.Jansen J.D.Almeida A.Silva E.Portela-Pereira A.Carapeto"""                                                                                                      |
| 419 | "Fabaceae;"Genista falcata"";"Autóctone"";"Endémica da Península Ibérica"";""";""";"143;"F.Clamote A.Silva J.Jansen P.V.Araújo J.D.Almeida A.Carapeto P.Beja E.Portela-Pereira M.Porto"""                                                                    |
| 420 | "Fabaceae;"Genista florida"";"Autóctone"";""";""";""";"75;"P.Silveira J.D.Almeida E.Portela-Pereira A.Silva D.T.Holyoak A.Carapeto F.Clamote M.Porto P.V.Araújo"""                                                                                           |
| 421 | "Fabaceae;"Genista triacanthos"";"Autóctone"";""";""";""";"298;"P.V.Araújo A.Silva"""                                                                                                                                                                        |
| 422 | "Fabaceae;"Hymenocarpus lotoides"";"Autóctone"";""";""";""";"268;"A.Silva"""                                                                                                                                                                                 |
| 423 | "Fabaceae;"Lathyrus angulatus"";"Autóctone"";""";""";""";"252;"F.Clamote"""                                                                                                                                                                                  |
| 424 | "Fabaceae;"Lathyrus aphaca"";"Autóctone"";""";""";""";"79;"A.Silva"""                                                                                                                                                                                        |
| 425 | "Fabaceae;"Lathyrus cicera"";"Autóctone"";""";""";""";"133;"A.Silva"""                                                                                                                                                                                       |
| 426 | "Fabaceae;"Lathyrus latifolius"";"Autóctone"";""";""";""";"56;"J.Jansen"""                                                                                                                                                                                   |
| 427 | "Fabaceae;"Lathyrus niger"";"Autóctone"";""";""";""";"25;"P.V.Araújo A.Silva"""                                                                                                                                                                              |
| 428 | "Fabaceae;"Lathyrus sphaericus"";"Autóctone"";""";""";""";"96;"J.D.Almeida A.Silva"""                                                                                                                                                                        |
| 429 | "Fabaceae;"Lathyrus sylvestris"";"Autóctone"";""";""";""";"47;"F.Clamote"""                                                                                                                                                                                  |
| 430 | "Fabaceae;"Lotus castellanus"";"Autóctone"";""";""";""";"67;"J.Jansen"""                                                                                                                                                                                     |
| 431 | "Fabaceae;"Lotus corniculatus subsp. carpetanus"";"Autóctone"";"Endémica da Península Ibérica"";""";""";"127;"F.Clamote A.Silva P.Silveira D.T.Holyoak J.D.Almeida"""                                                                                        |
| 432 | "Fabaceae;"Lotus corniculatus"";""";""";""";""";"216;"F.Clamote A.Silva"""                                                                                                                                                                                   |
| 433 | "Fabaceae;"Lotus glaber"";"Autóctone"";""";""";""";"16;"F.Clamote"""                                                                                                                                                                                         |

|     |                                                                                                                                                                             |
|-----|-----------------------------------------------------------------------------------------------------------------------------------------------------------------------------|
| 434 | "Fabaceae;" "Lotus pedunculatus"; "Autóctone"; " "; " "; " "; 368; "E.Portela-Pereira P.Silveira F.Clamote P.V.Araújo A.Silva J.T.Tavares J.Jansen J.D.Almeida D.T.Holyoak" |
| 435 | "Fabaceae;" "Lupinus angustifolius"; "Autóctone"; " "; " "; " "; 284; "F.Clamote J.D.Almeida"                                                                               |
| 436 | "Fabaceae;" "Lupinus gredensis"; "Autóctone"; "Endêmica da Península Ibérica"; " "; " "; 102; "J.Jansen P.V.Araújo A.Silva A.Carapeto F.Clamote J.D.Almeida"                |
| 437 | "Fabaceae;" "Lupinus luteus"; "Autóctone"; " "; " "; " "; 188; "P.V.Araújo J.D.Almeida"                                                                                     |
| 438 | "Fabaceae;" "Medicago arabica"; "Autóctone"; " "; " "; " "; 112; "F.Clamote"                                                                                                |
| 439 | "Fabaceae;" "Medicago lupulina"; "Autóctone"; " "; " "; " "; 131; "J.D.Almeida A.Silva"                                                                                     |
| 440 | "Fabaceae;" "Melilotus albus"; "Autóctone"; " "; " "; " "; 40; "A.Silva"                                                                                                    |
| 441 | "Fabaceae;" "Ornithopus compressus"; "Autóctone"; " "; " "; " "; 482; "F.Clamote A.Silva D.T.Holyoak J.D.Almeida E.Portela-Pereira J.Jansen"                                |
| 442 | "Fabaceae;" "Ornithopus perpusillus"; "Autóctone"; " "; " "; " "; 174; "D.T.Holyoak F.Clamote P.V.Araújo J.Jansen A.Silva"                                                  |
| 443 | "Fabaceae;" "Ornithopus pinnatus"; "Autóctone"; " "; " "; " "; 231; "A.Silva F.Clamote"                                                                                     |
| 444 | "Fabaceae;" "Ornithopus sativus"; " "; " "; " "; " "; 123; "F.Clamote"                                                                                                      |
| 445 | "Fabaceae;" "Pisum sativum subsp. elatius"; "Autóctone"; " "; " "; " "; 24; "J.Jansen"                                                                                      |
| 446 | "Fabaceae;" "Pisum sativum"; " "; " "; " "; " "; 54; "A.Silva"                                                                                                              |
| 447 | "Fabaceae;" "Pterospartum tridentatum subsp. cantabricum"; "Autóctone"; " "; " "; " "; 99; "A.Silva D.T.Holyoak"                                                            |
| 448 | "Fabaceae;" "Pterospartum tridentatum"; " "; " "; " "; " "; 464; "A.Carapeto F.Clamote P.Beja A.Silva M.Porto"                                                              |
| 449 | "Fabaceae;" "Retama sphaerocarpa"; "Autóctone"; " "; " "; " "; 126; "A.Carapeto"                                                                                            |
| 450 | "Fabaceae;" "Robinia pseudoacacia"; "Introduzida"; "Exótica"; " "; " "; 56; "E.Portela-Pereira J.D.Almeida"                                                                 |
| 451 | "Fabaceae;" "Trifolium angustifolium"; "Autóctone"; " "; " "; " "; 514; "F.Clamote A.Silva E.Portela-Pereira P.V.Araújo"                                                    |
| 452 | "Fabaceae;" "Trifolium arvense"; "Inexistente"; " "; " "; " "; 424; "F.Clamote A.Silva D.T.Holyoak J.D.Almeida"                                                             |
| 453 | "Fabaceae;" "Trifolium campestre"; "Autóctone"; " "; " "; "LC"; 387; "P.V.Araújo"                                                                                           |
| 454 | "Fabaceae;" "Trifolium dubium"; "Autóctone"; " "; " "; " "; 222; "P.V.Araújo D.T.Holyoak F.Clamote J.D.Almeida A.Silva"                                                     |
| 455 | "Fabaceae;" "Trifolium glomeratum"; "Autóctone"; " "; " "; " "; 245; "J.D.Almeida"                                                                                          |
| 456 | "Fabaceae;" "Trifolium incarnatum"; "Introduzida"; "Exótica"; " "; " "; 40; "P.V.Araújo"                                                                                    |
| 457 | "Fabaceae;" "Trifolium ochroleucon"; "Autóctone"; " "; " "; " "; 9; "J.D.Almeida"                                                                                           |
| 458 | "Fabaceae;" "Trifolium pratense subsp. pratense"; "Autóctone"; " "; " "; " "; 216; "A.Silva F.Clamote J.D.Almeida"                                                          |
| 459 | "Fabaceae;" "Trifolium repens"; "Inexistente"; " "; " "; " "; 498; "A.Silva F.Clamote D.T.Holyoak J.T.Tavares P.V.Araújo J.Jansen J.D.Almeida"                              |

|     |                                                                                                                                                                          |
|-----|--------------------------------------------------------------------------------------------------------------------------------------------------------------------------|
| 460 | "Fabaceae;"Trifolium repens var. repens";"Autóctone";"";"";"";"120;"J.D.Almeida""                                                                                        |
| 461 | "Fabaceae;"Trifolium subterraneum subsp. subterraneum";"Autóctone";"";"";"";"26;"E.Portela-Pereira""                                                                     |
| 462 | "Fabaceae;"Trifolium subterraneum";"Inexistente";"";"";"";"214;"F.Clamote""                                                                                              |
| 463 | "Fabaceae;"Trifolium vesiculosum";"Autóctone";"";"";"";"40;"E.Portela-Pereira""                                                                                          |
| 464 | "Fabaceae;"Ulex europaeus subsp. latebracteatus";"Autóctone";"Endêmica da Península Ibérica";"";"124;"C.Vila-Viçosa""                                                    |
| 465 | "Fabaceae;"Ulex europaeus";"";"";"";"209;"A.Silva""                                                                                                                      |
| 466 | "Fabaceae;"Ulex minor";"Autóctone";"";"";"";"321;"M.Porto J.D.Almeida A.Silva J.T.Tavares""                                                                              |
| 467 | "Fabaceae;"Vicia angustifolia";"Autóctone";"";"";"";"261;"E.Marabuto A.Silva F.Clamote D.T.Holyoak""                                                                     |
| 468 | "Fabaceae;"Vicia cordata";"Autóctone";"";"";"";"17;"E.Portela-Pereira""                                                                                                  |
| 469 | "Fabaceae;"Vicia dasycarpa";"Autóctone";"";"";"";"72;"F.Clamote""                                                                                                        |
| 470 | "Fabaceae;"Vicia disperma";"Autóctone";"";"";"";"232;"F.Clamote D.T.Holyoak A.Silva""                                                                                    |
| 471 | "Fabaceae;"Vicia hirsuta";"Autóctone";"";"";"";"37;"A.Silva""                                                                                                            |
| 472 | "Fabaceae;"Vicia lutea subsp. lutea";"Autóctone";"";"";"";"293;"P.V.Araújo F.Clamote""                                                                                   |
| 473 | "Fabaceae;"Vicia lutea";"";"";"";"469;"A.Silva""                                                                                                                         |
| 474 | "Fabaceae;"Vicia sativa subsp. sativa";"Autóctone";"";"";"";"337;"A.Silva J.D.Almeida""                                                                                  |
| 475 | "Fabaceae;"Vicia tenuifolia";"Autóctone";"";"";"";"12;"A.Silva""                                                                                                         |
| 476 | "Fagaceae;"Castanea sativa";"Introduzida";"Exótica";"";"296;"F.Clamote A.Carapeto A.Silva J.Pessoa J.Jansen E.Portela-Pereira J.D.Almeida J.T.Tavares P.Pereira""        |
| 477 | "Fagaceae;"Quercus faginea";"";"";"";"416;"A.Silva""                                                                                                                     |
| 478 | "Fagaceae;"Quercus pyrenaica";"Autóctone";"";"";"";"314;"F.Clamote E.Portela-Pereira A.Silva A.Carapeto J.D.Almeida P.V.Araújo P.Ministro J.Jansen""                     |
| 479 | "Fagaceae;"Quercus robur";"Autóctone";"";"";"";"256;"A.Silva E.Portela-Pereira A.Carapeto J.T.Tavares C.Vila-Viçosa P.Pereira""                                          |
| 480 | "Fagaceae;"Quercus rotundifolia";"Autóctone";"";"";"";"488;"A.Silva E.Portela-Pereira D.T.Holyoak F.Clamote J.T.Tavares""                                                |
| 481 | "Fagaceae;"Quercus rubra";"Introduzida";"Exótica";"";"22;"A.Carapeto""                                                                                                   |
| 482 | "Fagaceae;"Quercus suber";"Autóctone";"";"";"";"631;"A.Silva J.D.Almeida A.Carapeto""                                                                                    |
| 483 | "Gentianaceae;"Centaurium erythraea-(1)";"";"";"";"224;"P.V.Araújo A.Silva""                                                                                             |
| 484 | "Gentianaceae;"Cicendia filiformis";"Autóctone";"";"";"";"86;"J.Jansen""                                                                                                 |
| 485 | "Gentianaceae;"Gentiana lutea subsp. lutea";"Autóctone";"";"Anexo v";"CR";"2;"F.Clamote J.Jansen A.Silva C.Meireles P.V.Araújo M.Porto A.Matos J.D.Almeida D.T.Holyoak"" |

|     |                                                                                                                                                                                                                |
|-----|----------------------------------------------------------------------------------------------------------------------------------------------------------------------------------------------------------------|
| 486 | "Gentianaceae;" "Gentiana pneumonanthe"; "Autóctone"; "Endémica da Península Ibérica"; "55;" "A.J.Pereira F.Clamote A.Silva M.Porto P.V.Araújo J.T.Tavares P.Beja R.Lima P.Guillaumeau J.D.Almeida P.Ministro" |
| 487 | "Geraniaceae;" "Erodium cicutarium"; "Autóctone"; "Endémica da Península Ibérica"; "433;" "A.Silva D.T.Holyoak M.Porto F.Clamote"                                                                              |
| 488 | "Geraniaceae;" "Erodium moschatum"; "Autóctone"; "Endémica da Península Ibérica"; "393;" "J.T.Tavares P.Beja"                                                                                                  |
| 489 | "Geraniaceae;" "Geranium columbinum"; "Autóctone"; "Endémica da Península Ibérica"; "150;" "A.Silva"                                                                                                           |
| 490 | "Geraniaceae;" "Geranium dissectum"; "Autóctone"; "Endémica da Península Ibérica"; "316;" "F.Clamote"                                                                                                          |
| 491 | "Geraniaceae;" "Geranium lucidum"; "Autóctone"; "Endémica da Península Ibérica"; "313;" "A.Silva F.Clamote E.Portela-Pereira J.T.Tavares P.V.Araújo A.Carapeto"                                                |
| 492 | "Geraniaceae;" "Geranium molle"; "Autóctone"; "Endémica da Península Ibérica"; "545;" "A.Silva P.Beja F.Clamote J.D.Almeida J.Jansen"                                                                          |
| 493 | "Geraniaceae;" "Geranium purpureum"; "Autóctone"; "Endémica da Península Ibérica"; "517;" "A.Silva F.Clamote J.Jansen E.Portela-Pereira P.Pereira P.V.Araújo"                                                  |
| 494 | "Geraniaceae;" "Geranium pyrenaicum subsp. lusitanicum"; "Autóctone"; "Endémica da Península Ibérica"; "70;" "F.Clamote"                                                                                       |
| 495 | "Geraniaceae;" "Geranium robertianum"; "Autóctone"; "Endémica da Península Ibérica"; "134;" "A.Silva E.Portela-Pereira F.Clamote J.Jansen P.V.Araújo"                                                          |
| 496 | "Geraniaceae;" "Geranium rotundifolium"; "Autóctone"; "Endémica da Península Ibérica"; "303;" "E.Portela-Pereira A.Silva F.Clamote J.D.Almeida"                                                                |
| 497 | "Haloragaceae;" "Myriophyllum alterniflorum"; "Autóctone"; "Endémica da Península Ibérica"; "43;" "U.Schwarzer"                                                                                                |
| 498 | "Hypericaceae;" "Hypericum androsaemum"; "Autóctone"; "Endémica da Península Ibérica"; "94;" "A.Silva E.Portela-Pereira P.Pereira M.Porto J.T.Tavares"                                                         |
| 499 | "Hypericaceae;" "Hypericum elodes"; "Autóctone"; "Endémica da Península Ibérica"; "100;" "J.Jansen A.Silva"                                                                                                    |
| 500 | "Hypericaceae;" "Hypericum humifusum"; "Autóctone"; "Endémica da Península Ibérica"; "278;" "J.Jansen P.V.Araújo A.Silva P.Silveira D.T.Holyoak J.T.Tavares F.Clamote"                                         |
| 501 | "Hypericaceae;" "Hypericum linariifolium var. parviflorum"; "Autóctone"; "Endémica da Península Ibérica"; "38;" "J.D.Almeida"                                                                                  |
| 502 | "Hypericaceae;" "Hypericum linariifolium"; "Inexistente"; "Endémica da Península Ibérica"; "298;" "A.Silva D.T.Holyoak M.Porto P.V.Araújo J.Jansen J.D.Almeida P.Silveira F.Clamote"                           |
| 503 | "Hypericaceae;" "Hypericum perforatum"; "Inexistente"; "Endémica da Península Ibérica"; "514;" "J.Jansen J.D.Almeida F.Clamote"                                                                                |
| 504 | "Hypericaceae;" "Hypericum pulchrum"; "Autóctone"; "Endémica da Península Ibérica"; "48;" "A.Silva"                                                                                                            |
| 505 | "Hypericaceae;" "Hypericum undulatum"; "Autóctone"; "Endémica da Península Ibérica"; "312;" "F.Clamote A.Silva P.Silveira E.Portela-Pereira J.Jansen A.Carapeto P.Ministro"                                    |
| 506 | "Iridaceae;" "Crocus carpetanus"; "Autóctone"; "Endémica da Península Ibérica"; "41;" "A.Silva D.T.Holyoak A.Carapeto J.T.Tavares"                                                                             |
| 507 | "Iridaceae;" "Crocus serotinus"; "Autóctone"; "Endémica da Península Ibérica"; "171;" "A.Silva J.T.Tavares"                                                                                                    |
| 508 | "Iridaceae;" "Gladiolus illyricus"; "Autóctone"; "Endémica da Península Ibérica"; "259;" "A.Silva P.V.Araújo J.Jansen"                                                                                         |



|     |                                                                                                                                                                                       |
|-----|---------------------------------------------------------------------------------------------------------------------------------------------------------------------------------------|
| 509 | "Iridaceae;" "Romulea bulbocodium"; "Autóctone"; " "; " "; " "; 225; "P.Silveira A.Silva J.Jansen"                                                                                    |
| 510 | "Juncaceae;" "Juncus acutiflorus"; "Autóctone"; " "; " "; " "; 146; "A.Silva J.Jansen P.Silveira"                                                                                     |
| 511 | "Juncaceae;" "Juncus acutus"; "Autóctone"; " "; " "; " "; 106; "E.Portela-Pereira"                                                                                                    |
| 512 | "Juncaceae;" "Juncus articulatus subsp. articulatus"; "Autóctone"; " "; " "; " "; 109; "P.Silveira J.Jansen"                                                                          |
| 513 | "Juncaceae;" "Juncus bufonius"; "Autóctone"; " "; " "; " "; 287; "A.Silva J.Jansen E.Portela-Pereira"                                                                                 |
| 514 | "Juncaceae;" "Juncus bulbosus"; "Autóctone"; " "; " "; " "; 109; "F.Clamote J.Jansen A.Silva D.T.Holyoak P.Guillaumeau"                                                               |
| 515 | "Juncaceae;" "Juncus capitatus"; "Autóctone"; " "; " "; " "; 177; "J.Jansen"                                                                                                          |
| 516 | "Juncaceae;" "Juncus conglomeratus"; "Autóctone"; " "; " "; " "; 50; "E.Portela-Pereira"                                                                                              |
| 517 | "Juncaceae;" "Juncus effusus subsp. effusus"; "Autóctone"; " "; " "; " "; 245; "A.Silva F.Clamote P.V.Araújo J.Jansen P.Silveira"                                                     |
| 518 | "Juncaceae;" "Juncus pygmaeus"; "Autóctone"; " "; " "; " "; 101; "F.Clamote"                                                                                                          |
| 519 | "Juncaceae;" "Juncus squarrosus"; "Autóctone"; " "; " "; " "; 57; "A.Carapeto D.T.Holyoak P.Pereira J.Jansen A.Silva E.Portela-Pereira M.Porto F.Clamote P.V.Araújo J.D.Almeida"      |
| 520 | "Juncaceae;" "Juncus tenageia subsp. perpusillus"; "Autóctone"; " "; " "; " "; 1; "A.Silva"                                                                                           |
| 521 | "Juncaceae;" "Juncus tenageia"; " "; " "; " "; 94; "F.Clamote D.T.Holyoak A.Carapeto"                                                                                                 |
| 522 | "Juncaceae;" "Luzula caespitosa"; "Autóctone"; "Endémica da Península Ibérica"; " "; "NT"; 2; "J.Jansen A.Silva M.Porto D.T.Holyoak C.Meireles P.Pereira S.Ribeiro A.Matos"           |
| 523 | "Juncaceae;" "Luzula campestris"; "Autóctone"; " "; " "; " "; 81; "A.Silva J.D.Almeida"                                                                                               |
| 524 | "Juncaceae;" "Luzula forsteri"; "Autóctone"; " "; " "; " "; 139; "A.Silva F.Clamote J.D.Almeida J.Jansen"                                                                             |
| 525 | "Juncaceae;" "Luzula lactea"; "Autóctone"; "Endémica da Península Ibérica"; " "; " "; 43; "F.Clamote A.Silva P.Pereira A.Carapeto P.V.Araújo A.J.Pereira D.T.Holyoak"                 |
| 526 | "Juncaceae;" "Luzula multiflora subsp. multiflora"; "Autóctone"; " "; " "; " "; 40; "A.Silva E.Portela-Pereira"                                                                       |
| 527 | "Juncaceae;" "Luzula sylvatica subsp. henriquesii"; "Autóctone"; "Endémica da Península Ibérica"; " "; " "; 76; "E.Portela-Pereira A.Silva A.Carapeto F.Clamote J.Jansen J.D.Almeida" |
| 528 | "Lamiaceae;" "Acinos alpinus"; "Autóctone"; " "; " "; " "; 17; "P.V.Araújo A.Silva J.D.Almeida J.Jansen"                                                                              |
| 529 | "Lamiaceae;" "Ajuga pyramidalis subsp. meonantha"; "Autóctone"; " "; " "; " "; 28; "F.Clamote A.Silva J.Jansen"                                                                       |
| 530 | "Lamiaceae;" "Ajuga pyramidalis"; " "; " "; " "; " "; 69; "F.Clamote A.Silva"                                                                                                         |

|     |                                                                                                                                                                                          |
|-----|------------------------------------------------------------------------------------------------------------------------------------------------------------------------------------------|
| 531 | "Lamiaceae;"Calamintha nepeta subsp. nepeta"";"Autóctone"";""";""";""";380;"A.Silva M.Porto J.D.Almeida""                                                                                |
| 532 | "Lamiaceae;"Clinopodium vulgare"";"Autóctone"";""";""";""";368;"F.Clamote A.Silva J.D.Almeida E.Portela-Pereira P.V.Araújo J.Jansen A.Carapeto""                                         |
| 533 | "Lamiaceae;"Glechoma hederacea"";"Autóctone"";""";""";""";29;"A.Silva M.Porto P.Beja""                                                                                                   |
| 534 | "Lamiaceae;"Lamium amplexicaule"";"Autóctone"";""";""";""";299;"A.Silva F.Clamote P.Beja""                                                                                               |
| 535 | "Lamiaceae;"Lamium bifidum"";"Autóctone"";""";""";""";18;"M.Porto A.Silva""                                                                                                              |
| 536 | "Lamiaceae;"Lamium hybridum"";"Autóctone"";""";""";""";34;"P.Beja""                                                                                                                      |
| 537 | "Lamiaceae;"Lamium maculatum"";"Autóctone"";""";""";""";222;"J.D.Almeida D.T.Holyoak E.Portela-Pereira A.Silva M.Porto F.Clamote J.T.Tavares J.Jansen P.V.Araújo P.Beja""                |
| 538 | "Lamiaceae;"Lamium purpureum"";"Autóctone"";""";""";""";288;"F.Clamote J.D.Almeida A.Silva M.Porto P.Beja""                                                                              |
| 539 | "Lamiaceae;"Lavandula pedunculata subsp. pedunculata"";"Autóctone"";""";""";""";123;"J.Jansen J.D.Almeida""                                                                              |
| 540 | "Lamiaceae;"Lavandula stoechas"";""";""";""";""";389;"A.Silva F.Clamote P.Silveira M.Porto""                                                                                             |
| 541 | "Lamiaceae;"Lycopus europaeus"";"Autóctone"";""";""";""";297;"F.Clamote A.Silva""                                                                                                        |
| 542 | "Lamiaceae;"Melissa officinalis"";"Autóctone"";""";""";""";98;"P.Pereira""                                                                                                               |
| 543 | "Lamiaceae;"Melittis melissophyllum"";"Autóctone"";""";""";""";41;"A.Silva A.Carapeto""                                                                                                  |
| 544 | "Lamiaceae;"Mentha aquatica"";"Autóctone"";""";""";""";112;"P.Ministro""                                                                                                                 |
| 545 | "Lamiaceae;"Mentha pulegium"";"Autóctone"";""";""";""";392;"A.Silva F.Clamote P.Silveira""                                                                                               |
| 546 | "Lamiaceae;"Mentha suaveolens"";"Autóctone"";""";""";""";598;"F.Clamote A.Silva D.T.Holyoak A.Carapeto P.Silveira E.Portela-Pereira R.Faria J.D.Almeida A.Clemente""                     |
| 547 | "Lamiaceae;"Origanum vulgare subsp. virens"";"Autóctone"";""";""";""";287;"A.Silva F.Clamote J.T.Tavares J.D.Almeida J.Jansen""                                                          |
| 548 | "Lamiaceae;"Prunella grandiflora"";"Autóctone"";""";""";""";48;"A.Silva E.Portela-Pereira P.V.Araújo""                                                                                   |
| 549 | "Lamiaceae;"Prunella vulgaris"";"Autóctone"";""";""";""";404;"E.Portela-Pereira F.Clamote A.Silva J.T.Tavares P.V.Araújo P.Silveira""                                                    |
| 550 | "Lamiaceae;"Salvia verbenaca"";"Autóctone"";""";""";""";174;"A.Silva""                                                                                                                   |
| 551 | "Lamiaceae;"Scutellaria minor"";"Autóctone"";""";""";""";108;"J.Jansen E.Portela-Pereira A.Silva""                                                                                       |
| 552 | "Lamiaceae;"Stachys arvensis"";"Autóctone"";""";""";""";428;"A.Silva P.Beja F.Clamote""                                                                                                  |
| 553 | "Lamiaceae;"Teucrium salviastrum"";"Endémica"";"Endémica de Portugal continental"";"Anexo V"";"LC"";30;"D.T.Holyoak A.Silva J.Jansen F.Clamote J.D.Almeida E.Marabuto M.Porto E.Portela- |

|     |                                                                                                                                                                                                                                               |
|-----|-----------------------------------------------------------------------------------------------------------------------------------------------------------------------------------------------------------------------------------------------|
|     | Pereira P.Pereira P.V.Araújo C.Meireles A.Carapeto J.T.Tavares C.Aguiar A.J.Pereira P.Silveira P.Ministro""                                                                                                                                   |
| 554 | "Lamiaceae;""Teucrium scorodonia"";""Autóctone"";"""";"""";"""";429;""F.Clamote A.Silva M.Porto J.T.Tavares J.D.Almeida A.Carapeto E.Portela-Pereira P.V.Araújo""                                                                             |
| 555 | "Lamiaceae;""Thymus mastichina subsp. mastichina"";""Autóctone"";""Endémica da Península Ibérica"";"""";"""";119;""P.V.Araújo E.Portela-Pereira J.D.Almeida P.Ministro""                                                                      |
| 556 | "Lamiaceae;""Thymus mastichina"";"""";"""";"""";296;""F.Clamote A.Silva""                                                                                                                                                                     |
| 557 | "Lauraceae;""Laurus nobilis"";""Autóctone"";"""";"""";"""";237;""A.Silva J.Jansen""                                                                                                                                                           |
| 558 | "Liliaceae;""Erythronium dens-canis"";""Autóctone"";"""";"""";"""";25;""A.Silva H.Engels J.Jansen""                                                                                                                                           |
| 559 | "Liliaceae;""Fritillaria nervosa subsp. nervosa"";""Autóctone"";"""";"""";""NT"";20;""E.Portela-Pereira A.Carapeto J.Jansen A.Matos P.V.Araújo J.D.Almeida P.Lemos A.Silva S.Ribeiro F.Clamote P.Ministro D.T.Holyoak A.J.Pereira P.Pereira"" |
| 560 | "Liliaceae;""Gagea foliosa subsp. ellyptica"";""Autóctone"";"""";"""";"""";36;""S.Ribeiro""                                                                                                                                                   |
| 561 | "Liliaceae;""Gagea soleirolii"";""Autóctone"";"""";"""";"""";87;""A.Carapeto E.Portela-Pereira F.Clamote A.Silva M.Porto J.Jansen D.T.Holyoak S.Ribeiro""                                                                                     |
| 562 | "Liliaceae;""Lilium martagon"";""Autóctone"";"""";"""";""VU"";18;""A.Silva AOSP J.D.Almeida""                                                                                                                                                 |
| 563 | "Linaceae;""Linum bienne"";""Autóctone"";"""";"""";"""";400;""A.Silva""                                                                                                                                                                       |
| 564 | "Linaceae;""Linum trigynum subsp. trigynum"";""Autóctone"";"""";"""";"""";59;""P.V.Araújo""                                                                                                                                                   |
| 565 | "Linaceae;""Radiola linoides"";""Autóctone"";"""";"""";"""";127;""A.Silva""                                                                                                                                                                   |
| 566 | "Lycopodiaceae;""Lycopodiella inundata"";""Autóctone"";"""";""Anexo V"";""EN"";9;""A.Silva F.Covelo""                                                                                                                                         |
| 567 | "Lycopodiaceae;""Lycopodium clavatum"";""Autóctone"";"""";""Anexo V"";""CR"";1;""A.Silva P.V.Araújo A.Matos""                                                                                                                                 |
| 568 | "Lythraceae;""Lythrum portula"";""Autóctone"";"""";"""";"""";113;""A.Silva P.Silveira F.Clamote""                                                                                                                                             |
| 569 | "Lythraceae;""Lythrum salicaria"";""Autóctone"";"""";"""";"""";402;""E.Portela-Pereira F.Clamote A.Clemente""                                                                                                                                 |
| 570 | "Malvaceae;""Malva neglecta"";""Autóctone"";"""";"""";"""";54;""A.Silva""                                                                                                                                                                     |
| 571 | "Malvaceae;""Malva sylvestris"";""Autóctone"";"""";"""";"""";104;""F.Clamote""                                                                                                                                                                |
| 572 | "Malvaceae;""Malva tournefortiana"";""Autóctone"";"""";"""";"""";198;""A.Silva F.Clamote E.Portela-Pereira J.D.Almeida E.Marabuto P.V.Araújo J.Jansen""                                                                                       |
| 573 | "Melanthiaceae;""Veratrum album"";""Autóctone"";"""";"""";""CR"";3;""A.Silva J.Jansen P.V.Araújo A.Matos AOSP""                                                                                                                               |
| 574 | "Menyanthaceae;""Menyanthes trifoliata"";""Autóctone"";"""";"""";""EN"";3;""J.Jansen A.Silva A.Matos C.Meireles""                                                                                                                             |
| 575 | "Moraceae;""Ficus carica"";""De espontaneidade incerta"";"""";"""";"""";273;""E.Portela-Pereira""                                                                                                                                             |

|     |                                                                                                                                                        |
|-----|--------------------------------------------------------------------------------------------------------------------------------------------------------|
| 576 | "Myrtaceae;" "Eucalyptus globulus"; "Introduzida"; "Exótica"; " "; " "; 343; "A.Silva P.Pereira"                                                       |
| 577 | "Oleaceae;" "Fraxinus angustifolia subsp. angustifolia"; "Autóctone"; " "; " "; " "; 605; "F.Clamote A.Silva J.T.Tavares J.Jansen E.Portela-Pereira"   |
| 578 | "Oleaceae;" "Olea europaea var. europaea"; "Introduzida"; "Exótica"; " "; " "; " "; 236; "A.Silva"                                                     |
| 579 | "Oleaceae;" "Phillyrea angustifolia"; "Autóctone"; " "; " "; " "; 404; "A.Silva P.Silveira P.Beja M.Porto"                                             |
| 580 | "Onagraceae;" "Circaea lutetiana subsp. lutetiana"; "Autóctone"; " "; " "; " "; 40; "A.Silva"                                                          |
| 581 | "Onagraceae;" "Epilobium lanceolatum"; "Autóctone"; " "; " "; " "; 20; "A.Silva E.Portela-Pereira"                                                     |
| 582 | "Onagraceae;" "Epilobium obscurum"; "Autóctone"; " "; " "; " "; 52; "E.Portela-Pereira A.Silva J.Jansen M.Porto D.T.Holyoak P.Silveira"                |
| 583 | "Onagraceae;" "Epilobium palustre"; "Autóctone"; " "; " "; " "; 3; "A.Silva J.Jansen"                                                                  |
| 584 | "Onagraceae;" "Epilobium tetragonum subsp. tetragonum"; "Autóctone"; " "; " "; " "; 12; "P.Ministro"                                                   |
| 585 | "Orchidaceae;" "Dactylorhiza maculata"; "Autóctone"; " "; " "; " "; 77; "J.Jansen P.V.Araújo A.Amado A.Silva E.Portela-Pereira AOSP F.Clamote M.Porto" |
| 586 | "Orchidaceae;" "Epipactis fageticola"; "Autóctone"; " "; " "; "EN"; 6; "J.Pessoa P.V.Araújo AOSP"                                                      |
| 587 | "Orchidaceae;" "Epipactis helleborine subsp. helleborine"; "Autóctone"; " "; " "; " "; 19; "A.Silva AOSP P.V.Araújo J.Pessoa"                          |
| 588 | "Orchidaceae;" "Neottia nidus-avis"; "Autóctone"; " "; " "; "VU"; 9; "J.Pessoa"                                                                        |
| 589 | "Orchidaceae;" "Orchis langei"; "Autóctone"; " "; " "; " "; 42; "A.Silva P.V.Araújo"                                                                   |
| 590 | "Orchidaceae;" "Orchis mascula"; "Autóctone"; " "; " "; " "; 79; "A.Silva P.Silveira"                                                                  |
| 591 | "Orchidaceae;" "Serapias cordigera subsp. cordigera"; "Autóctone"; " "; " "; " "; 94; "J.Jansen E.Marabuto A.Silva"                                    |
| 592 | "Orchidaceae;" "Serapias lingua"; "Autóctone"; " "; " "; " "; 227; "A.Silva"                                                                           |
| 593 | "Orobanchaceae;" "Bartsia trixago"; "Autóctone"; " "; " "; " "; 352; "F.Clamote J.Jansen"                                                              |
| 594 | "Orobanchaceae;" "Orobanche gracilis"; "Autóctone"; " "; " "; " "; 78; "E.Portela-Pereira A.Silva"                                                     |
| 595 | "Orobanchaceae;" "Orobanche minor"; "Autóctone"; " "; " "; " "; 79; "P.V.Araújo"                                                                       |
| 596 | "Orobanchaceae;" "Orobanche rapum-genistae"; "Autóctone"; " "; " "; " "; 126; "F.Clamote P.V.Araújo A.Silva D.T.Holyoak J.Jansen"                      |
| 597 | "Orobanchaceae;" "Parentucellia latifolia"; "Autóctone"; " "; " "; " "; 146; "A.Silva"                                                                 |
| 598 | "Orobanchaceae;" "Parentucellia viscosa"; "Autóctone"; " "; " "; " "; 338; "F.Clamote"                                                                 |

|     |                                                                                                                                                                                                 |
|-----|-------------------------------------------------------------------------------------------------------------------------------------------------------------------------------------------------|
| 599 | "Orobanchaceae;" "Pedicularis sylvatica subsp. lusitanica"; "Autóctone"; " "; " "; " "; 118; "F.Clamote A.Silva M.Porto J.Jansen A.Carapeto D.T.Holyoak E.Portela-Pereira S.Ribeiro P.V.Araújo" |
| 600 | "Orobanchaceae;" "Rhinanthus minor"; "Autóctone"; " "; " "; " "; 65; "A.Silva E.Marabuto"                                                                                                       |
| 601 | "Osmundaceae;" "Osmunda regalis"; "Autóctone"; " "; " "; " "; 301; "A.Silva E.Portela-Pereira A.Carapeto M.Porto J.T.Tavares F.Clamote"                                                         |
| 602 | "Oxalidaceae;" "Oxalis corniculata"; "Autóctone"; " "; " "; " "; 222; "P.Beja"                                                                                                                  |
| 603 | "Oxalidaceae;" "Oxalis pes-caprae"; "Introduzida"; "Exótica"; " "; " "; 379; "M.Porto"                                                                                                          |
| 604 | "Paeoniaceae;" "Paeonia broteri"; "Autóctone"; " "; " "; "LC"; 104; "A.Silva A.Carapeto J.D.Almeida J.Pessoa"                                                                                   |
| 605 | "Paeoniaceae;" "Paeonia officinalis subsp. microcarpa"; "Autóctone"; " "; " "; " "; 12; "J.D.Almeida A.Silva"                                                                                   |
| 606 | "Papaveraceae;" "Ceratocapnos claviculata subsp. picta"; "Endémica"; "Endémica de Portugal continental"; " "; "LC"; 22; "P.Pereira A.Silva"                                                     |
| 607 | "Papaveraceae;" "Ceratocapnos claviculata subsp. claviculata"; "Autóctone"; " "; " "; " "; 98; "A.Silva E.Portela-Pereira"                                                                      |
| 608 | "Papaveraceae;" "Ceratocapnos claviculata"; " "; " "; " "; " "; 146; "A.Carapeto"                                                                                                               |
| 609 | "Papaveraceae;" "Chelidonium majus"; "Autóctone"; " "; " "; " "; 310; "F.Clamote A.Silva E.Portela-Pereira J.Jansen P.Beja J.T.Tavares"                                                         |
| 610 | "Papaveraceae;" "Fumaria bastardii"; "Autóctone"; " "; " "; " "; 22; "A.Silva"                                                                                                                  |
| 611 | "Papaveraceae;" "Fumaria muralis"; "Autóctone"; " "; " "; " "; 154; "A.Silva E.Portela-Pereira"                                                                                                 |
| 612 | "Papaveraceae;" "Papaver argemone"; "Autóctone"; " "; " "; " "; 38; "A.Silva"                                                                                                                   |
| 613 | "Papaveraceae;" "Papaver dubium"; "Autóctone"; " "; " "; " "; 159; "A.Silva F.Clamote"                                                                                                          |
| 614 | "Papaveraceae;" "Papaver rhoeas"; " "; " "; " "; " "; 375; "A.Silva"                                                                                                                            |
| 615 | "Phytolaccaceae;" "Phytolacca americana"; "Introduzida"; "Exótica"; " "; " "; 272; "A.Silva E.Portela-Pereira F.Clamote"                                                                        |
| 616 | "Pinaceae;" "Pinus pinaster"; "Autóctone"; " "; " "; " "; 581; "A.Silva F.Clamote E.Portela-Pereira D.T.Holyoak P.Pereira"                                                                      |
| 617 | "Pinaceae;" "Pinus sylvestris"; "Autóctone"; " "; " "; "EN"; 30; "E.Portela-Pereira J.T.Tavares D.Frade A.Carapeto D.T.Holyoak"                                                                 |
| 618 | "Plantaginaceae;" "Anarrhinum bellidifolium"; "Autóctone"; " "; " "; " "; 516; "F.Clamote A.Silva M.Porto P.V.Araújo J.Jansen E.Marabuto J.D.Almeida E.Portela-Pereira J.T.Tavares"             |
| 619 | "Plantaginaceae;" "Antirrhinum graniticum"; "Autóctone"; "Endémica da Península Ibérica"; " "; " "; 88; "F.Clamote A.Silva J.Jansen"                                                            |
| 620 | "Plantaginaceae;" "Antirrhinum meonanthum"; "Autóctone"; "Endémica da Península Ibérica"; " "; " "; 18; "A.Silva E.Portela-Pereira J.D.Almeida P.V.Araújo E.Marabuto"                           |

|     |                                                                                                                                                                                                                                  |
|-----|----------------------------------------------------------------------------------------------------------------------------------------------------------------------------------------------------------------------------------|
| 621 | "Plantaginaceae;""Cymbalaria muralis subsp. muralis"";""Introduzida"";""Endémica da Península Ibérica"";"""";"""";168;""A.Silva J.T.Tavares""                                                                                    |
| 622 | "Plantaginaceae;""Digitalis purpurea subsp. purpurea"";""Autóctone"";"""";"""";"""";399;""D.T.Holyoak A.Carapeto M.Porto P.V.Araújo F.Clamote J.Jansen A.Silva J.D.Almeida E.Marabuto""                                          |
| 623 | "Plantaginaceae;""Digitalis purpurea"";"""";"""";"""";"""";589;""J.T.Tavares F.Clamote A.Silva J.Jansen J.D.Almeida E.Portela-Pereira""                                                                                          |
| 624 | "Plantaginaceae;""Digitalis thapsi"";""Autóctone"";""Endémica da Península Ibérica"";"""";"""";184;""A.Silva D.T.Holyoak F.Clamote M.Porto J.Jansen P.V.Araújo""                                                                 |
| 625 | "Plantaginaceae;""Linaria diffusa"";""Endémica"";""Endémica de Portugal continental"";"""";""DD"";8;""A.Silva""                                                                                                                  |
| 626 | "Plantaginaceae;""Linaria elegans"";""Autóctone"";""Endémica da Península Ibérica"";"""";"""";63;""J.T.Tavares M.Porto P.V.Araújo F.Clamote A.J.Pereira A.Silva S.Ribeiro A.Carapeto F.Covelo P.Beja J.Jansen""                  |
| 627 | "Plantaginaceae;""Linaria saxatilis"";""Autóctone"";""Endémica da Península Ibérica"";"""";"""";160;""A.Silva J.Jansen J.D.Almeida D.T.Holyoak E.Portela-Pereira P.V.Araújo P.Pereira F.Clamote M.Porto A.J.Pereira P.Silveira"" |
| 628 | "Plantaginaceae;""Linaria spartea"";""Autóctone"";"""";"""";"""";320;""P.V.Araújo""                                                                                                                                              |
| 629 | "Plantaginaceae;""Linaria triornithophora"";""Autóctone"";""Endémica da Península Ibérica"";"""";"""";182;""F.Clamote E.Portela-Pereira P.V.Araújo A.Silva J.D.Almeida""                                                         |
| 630 | "Plantaginaceae;""Misopates orontium"";""Autóctone"";"""";"""";"""";380;""P.V.Araújo A.Silva E.Portela-Pereira""                                                                                                                 |
| 631 | "Plantaginaceae;""Plantago alpina"";""Autóctone"";"""";"""";""NT"";1;""J.Jansen A.Silva F.Clamote P.Pereira A.Matos S.Ribeiro""                                                                                                  |
| 632 | "Plantaginaceae;""Plantago bellardii"";""Autóctone"";"""";"""";"""";146;""A.Silva""                                                                                                                                              |
| 633 | "Plantaginaceae;""Plantago coronopus"";""Autóctone"";"""";"""";"""";621;""M.Porto A.Silva D.T.Holyoak J.D.Almeida""                                                                                                              |
| 634 | "Plantaginaceae;""Plantago holosteum"";""Autóctone"";"""";"""";"""";40;""A.Silva P.Pereira P.V.Araújo J.D.Almeida P.Ministro J.Jansen""                                                                                          |
| 635 | "Plantaginaceae;""Plantago lanceolata"";""Autóctone"";"""";"""";"""";545;""A.Silva F.Clamote E.Portela-Pereira J.D.Almeida D.T.Holyoak P.V.Araújo J.Jansen""                                                                     |
| 636 | "Plantaginaceae;""Plantago major subsp. intermedia"";""Autóctone"";"""";"""";"""";299;""A.Silva F.Clamote J.D.Almeida""                                                                                                          |
| 637 | "Plantaginaceae;""Sibthorpia europaea"";""Autóctone"";"""";"""";"""";149;""A.Silva M.Porto J.T.Tavares J.Jansen P.V.Araújo F.Clamote""                                                                                           |
| 638 | "Plantaginaceae;""Veronica arvensis"";""Autóctone"";"""";"""";"""";250;""J.D.Almeida D.T.Holyoak F.Clamote P.Beja J.Jansen""                                                                                                     |
| 639 | "Plantaginaceae;""Veronica hederifolia"";""Autóctone"";"""";"""";"""";72;""A.Silva""                                                                                                                                             |

|     |                                                                                                                                                                                   |
|-----|-----------------------------------------------------------------------------------------------------------------------------------------------------------------------------------|
| 640 | "Plantaginaceae;"Veronica micrantha";"Autóctone";"Endémica da Península Ibérica";"Anexo IIAnexo IV";"NT";41;"A.Silva J.Jansen E.Portela-Pereira"                                  |
| 641 | "Plantaginaceae;"Veronica nevadensis";"Autóctone";"Endémica da Península Ibérica";"VU";3;"J.Jansen P.Pereira F.Clamote P.V.Araújo A.Silva D.T.Holyoak"                            |
| 642 | "Plantaginaceae;"Veronica officinalis";"Autóctone";"87;"A.Silva F.Clamote J.D.Almeida E.Portela-Pereira P.V.Araújo"                                                               |
| 643 | "Plantaginaceae;"Veronica persica";"Autóctone";"165;"A.Silva P.Beja"                                                                                                              |
| 644 | "Plantaginaceae;"Veronica scutellata";"Autóctone";"27;"A.Silva J.Jansen"                                                                                                          |
| 645 | "Plumbaginaceae;"Armeria beirana";"41;"S.Ribeiro"                                                                                                                                 |
| 646 | "Plumbaginaceae;"Armeria beirana subsp. beirana";"Autóctone";"Endémica da Península Ibérica";"33;"E.Portela-Pereira A.Silva D.T.Holyoak J.D.Almeida P.Silveira"                   |
| 647 | "Plumbaginaceae;"Armeria sampaioi";"Endémica";"Endémica de Portugal continental";"Anexo V";"VU";10;"J.Jansen P.Pereira C.Meireles A.Silva F.Clamote S.Ribeiro A.Carapeto M.Porto" |
| 648 | "Plumbaginaceae;"Armeria transmontana";"Autóctone";"Endémica da Península Ibérica";"73;"E.Portela-Pereira A.Carapeto F.Clamote"                                                   |
| 649 | "Poaceae;"Agrostis canina subsp. canina";"Autóctone";"2;"J.Jansen"                                                                                                                |
| 650 | "Poaceae;"Agrostis capillaris";"Autóctone";"11;"E.Portela-Pereira"                                                                                                                |
| 651 | "Poaceae;"Agrostis castellana";"Autóctone";"255;"P.Silveira D.T.Holyoak E.Portela-Pereira A.Carapeto P.Ministro J.Jansen A.Silva J.D.Almeida"                                     |
| 652 | "Poaceae;"Agrostis curtisii";"Autóctone";"186;"A.Silva P.Silveira J.D.Almeida"                                                                                                    |
| 653 | "Poaceae;"Agrostis hesperica";"Autóctone";"10;"E.Portela-Pereira"                                                                                                                 |
| 654 | "Poaceae;"Agrostis pourretii";"Autóctone";"72;"A.Silva"                                                                                                                           |
| 655 | "Poaceae;"Agrostis truncatula subsp. commista";"Autóctone";"60;"A.Silva E.Portela-Pereira"                                                                                        |
| 656 | "Poaceae;"Agrostis truncatula subsp. truncatula";"Autóctone";"19;"P.Silveira A.Silva D.T.Holyoak"                                                                                 |
| 657 | "Poaceae;"Agrostis truncatula";"144;"A.Silva P.Ministro J.Jansen A.Carapeto"                                                                                                      |
| 658 | "Poaceae;"Aira caryophyllea";"164;"D.T.Holyoak A.Silva"                                                                                                                           |
| 659 | "Poaceae;"Aira praecox";"Autóctone";"60;"D.T.Holyoak J.Jansen A.Silva"                                                                                                            |
| 660 | "Poaceae;"Anthoxanthum amarum";"Autóctone";"Endémica da Península Ibérica";"40;"J.Jansen"                                                                                         |
| 661 | "Poaceae;"Anthoxanthum aristatum subsp. aristatum";"Autóctone";"156;"A.Silva J.Jansen D.T.Holyoak"                                                                                |
| 662 | "Poaceae;"Anthoxanthum odoratum";"Autóctone";"87;"F.Clamote A.Silva J.Jansen"                                                                                                     |

|     |                                                                                                                                  |
|-----|----------------------------------------------------------------------------------------------------------------------------------|
| 663 | "Poaceae;"Antinoria agrostidea";"Autóctone";"";"";"";"56;"A.Silva D.T.Holyoak A.Carapeto P.V.Araújo J.Jansen""                   |
| 664 | "Poaceae;"Arrhenatherum album";"";"";"";"";"";"94;"D.T.Holyoak""                                                                 |
| 665 | "Poaceae;"Arrhenatherum elatius subsp. elatius";"Autóctone";"";"";"";"14;"E.Portela-Pereira""                                    |
| 666 | "Poaceae;"Arrhenatherum elatius subsp. bulbosum";"Autóctone";"";"";"";"150;"J.D.Almeida A.Silva D.T.Holyoak E.Portela-Pereira""  |
| 667 | "Poaceae;"Arrhenatherum elatius";"";"";"";"";"";"225;"A.Silva E.Portela-Pereira J.Jansen""                                       |
| 668 | "Poaceae;"Avena barbata subsp. barbata";"Autóctone";"";"";"";"107;"E.Portela-Pereira""                                           |
| 669 | "Poaceae;"Avena barbata subsp. lusitanica";"Autóctone";"";"";"";"44;"E.Portela-Pereira""                                         |
| 670 | "Poaceae;"Avena barbata";"Inexistente";"";"";"";"477;"E.Portela-Pereira J.D.Almeida""                                            |
| 671 | "Poaceae;"Avena sativa subsp. macrantha";"Introduzida";"Exótica";"";"";"";"16;"J.Jansen""                                        |
| 672 | "Poaceae;"Avenula sulcata";"";"";"";"";"";"114;"A.Silva A.Carapeto J.Jansen P.Pereira""                                          |
| 673 | "Poaceae;"Avenula sulcata subsp. sulcata";"Autóctone";"";"";"";"24;"D.T.Holyoak E.Portela-Pereira""                              |
| 674 | "Poaceae;"Brachypodium phoenicoides";"";"";"";"";"";"215;"A.Silva""                                                              |
| 675 | "Poaceae;"Brachypodium sylvaticum";"Autóctone";"";"";"";"265;"E.Portela-Pereira J.Jansen A.Silva""                               |
| 676 | "Poaceae;"Briza maxima";"Autóctone";"";"";"";"683;"F.Clamote M.Porto J.Jansen A.Silva E.Portela-Pereira A.Carapeto J.D.Almeida"" |
| 677 | "Poaceae;"Briza minor";"Autóctone";"";"";"";"320;"E.Portela-Pereira J.Jansen F.Clamote""                                         |
| 678 | "Poaceae;"Bromus diandrus";"Autóctone";"";"";"";"282;"A.Silva D.T.Holyoak J.Jansen""                                             |
| 679 | "Poaceae;"Bromus hordeaceus";"Autóctone";"";"";"";"313;"A.Silva D.T.Holyoak E.Portela-Pereira J.Jansen P.Beja""                  |
| 680 | "Poaceae;"Bromus rigidus";"Autóctone";"";"";"";"62;"E.Portela-Pereira""                                                          |
| 681 | "Poaceae;"Bromus sterilis";"Autóctone";"";"";"";"73;"F.Clamote""                                                                 |
| 682 | "Poaceae;"Bromus tectorum";"Autóctone";"";"";"";"95;"A.Silva D.T.Holyoak M.Porto""                                               |
| 683 | "Poaceae;"Cortaderia selloana";"Introduzida";"Exótica";"";"";"";"143;"A.Silva""                                                  |
| 684 | "Poaceae;"Corynephorus canescens";"Autóctone";"";"";"";"108;"D.T.Holyoak A.Silva""                                               |
| 685 | "Poaceae;"Cynosurus echinatus";"Autóctone";"";"";"";"416;"E.Portela-Pereira F.Clamote A.Silva D.T.Holyoak M.Porto J.Jansen""     |
| 686 | "Poaceae;"Cynosurus effusus";"Autóctone";"";"";"";"55;"E.Portela-Pereira""                                                       |



|     |                                                                                                                                                                                                    |
|-----|----------------------------------------------------------------------------------------------------------------------------------------------------------------------------------------------------|
| 687 | "Poaceae;" "Dactylis glomerata subsp. lusitanica"; "Autóctone"; " "; " "; " "; " "; 126; "E.Portela-Pereira A.Silva" "                                                                             |
| 688 | "Poaceae;" "Dactylis glomerata"; " "; " "; " "; " "; " "; 779; "A.Silva D.T.Holyoak F.Clamote J.Jansen" "                                                                                          |
| 689 | "Poaceae;" "Danthonia decumbens"; "Autóctone"; " "; " "; " "; " "; 136; "J.Jansen A.Silva" "                                                                                                       |
| 690 | "Poaceae;" "Deschampsia flexuosa"; "Autóctone"; " "; " "; " "; " "; 18; "P.Pereira M.Porto A.Silva J.Jansen D.T.Holyoak E.Portela-Pereira" "                                                       |
| 691 | "Poaceae;" "Deschampsia stricta"; "Endémica"; "Endémica de Portugal continental"; " "; " "; " "; 23; "M.Porto" "                                                                                   |
| 692 | "Poaceae;" "Festuca ampla subsp. ampla"; "Autóctone"; " "; " "; " "; " "; 26; "J.Jansen E.Portela-Pereira" "                                                                                       |
| 693 | "Poaceae;" "Festuca durandoi subsp. livida"; "Autóctone"; "Endémica da Península Ibérica"; " "; " "; " "; 15; "J.Jansen" "                                                                         |
| 694 | "Poaceae;" "Festuca elegans"; "Autóctone"; " "; "Anexo IIAnexo IV"; "LC"; 44; "P.Pereira S.Ribeiro J.Jansen E.Portela-Pereira A.Silva A.Carapeto D.T.Holyoak" "                                    |
| 695 | "Poaceae;" "Festuca henriquesii"; "Endémica"; "Endémica de Portugal continental"; "Anexo IIAnexo IV"; "VU"; 2; "A.Silva S.Ribeiro A.Carapeto J.Jansen D.T.Holyoak E.Portela-Pereira" "             |
| 696 | "Poaceae;" "Festuca indigesta"; "Autóctone"; " "; " "; " "; " "; 6; "A.Silva" "                                                                                                                    |
| 697 | "Poaceae;" "Festuca nigrescens subsp. microphylla"; "Autóctone"; " "; " "; " "; " "; 17; "E.Portela-Pereira" "                                                                                     |
| 698 | "Poaceae;" "Festuca paniculata subsp. multispiculata"; "Autóctone"; " "; " "; " "; " "; 27; "A.Silva A.Carapeto" "                                                                                 |
| 699 | "Poaceae;" "Festuca pseudotrichophylla"; "Autóctone"; " "; " "; " "; " "; 4; "E.Portela-Pereira" "                                                                                                 |
| 700 | "Poaceae;" "Festuca rivularis"; "Autóctone"; " "; " "; " "; " "; 9; "J.Jansen A.Silva" "                                                                                                           |
| 701 | "Poaceae;" "Festuca summilusitana"; "Autóctone"; "Endémica da Península Ibérica"; "Anexo IIAnexo IV"; "LC"; 32; "P.Pereira D.T.Holyoak A.Silva E.Portela-Pereira J.Jansen P.Silveira A.Carapeto" " |
| 702 | "Poaceae;" "Festuca trichophylla"; "Autóctone"; " "; " "; " "; " "; 4; "E.Portela-Pereira" "                                                                                                       |
| 703 | "Poaceae;" "Holcus gayanus"; "Autóctone"; "Endémica da Península Ibérica"; " "; " "; " "; 8; "J.Jansen A.Silva D.T.Holyoak" "                                                                      |
| 704 | "Poaceae;" "Holcus lanatus"; " "; " "; " "; " "; 480; "D.T.Holyoak E.Portela-Pereira F.Clamote A.Silva J.T.Tavares J.Jansen P.Silveira" "                                                          |
| 705 | "Poaceae;" "Holcus mollis"; "Autóctone"; " "; " "; " "; " "; 135; "E.Portela-Pereira A.Silva J.Jansen A.Carapeto" "                                                                                |
| 706 | "Poaceae;" "Hordeum murinum subsp. murinum"; "Autóctone"; " "; " "; " "; " "; 8; "D.T.Holyoak" "                                                                                                   |
| 707 | "Poaceae;" "Hordeum murinum subsp. leporinum"; "Autóctone"; " "; " "; " "; " "; 171; "D.T.Holyoak E.Portela-Pereira" "                                                                             |
| 708 | "Poaceae;" "Hordeum murinum"; " "; " "; " "; " "; 341; "J.Jansen" "                                                                                                                                |

|     |                                                                                                                                           |
|-----|-------------------------------------------------------------------------------------------------------------------------------------------|
| 709 | "Poaceae;"Koeleria caudata"";"Autóctone"";"Endémica da Península Ibérica"";"13;"A.Silva""                                                 |
| 710 | "Poaceae;"Koeleria crassipes"";"Autóctone"";"Endémica da Península Ibérica"";"16;"D.T.Holyoak P.Ministro""                                |
| 711 | "Poaceae;"Lolium perenne"";"Autóctone"";"64;"D.T.Holyoak A.Silva""                                                                        |
| 712 | "Poaceae;"Melica uniflora"";"Autóctone"";"21;"A.Silva""                                                                                   |
| 713 | "Poaceae;"Mibora minima"";"Autóctone"";"89;"A.Silva""                                                                                     |
| 714 | "Poaceae;"Micropyrum patens"";"Autóctone"";"31;"J.Jansen""                                                                                |
| 715 | "Poaceae;"Micropyrum tenellum"";"Autóctone"";"160;"J.Jansen A.Silva P.Silveira D.T.Holyoak E.Portela-Pereira M.Porto""                    |
| 716 | "Poaceae;"Molineriella laevis"";"Autóctone"";"62;"J.Jansen""                                                                              |
| 717 | "Poaceae;"Molinia caerulea"";"Autóctone"";"155;"A.Silva E.Portela-Pereira""                                                               |
| 718 | "Poaceae;"Nardus stricta"";"Autóctone"";"46;"P.V.Araújo A.Carapeto A.Silva A.J.Pereira J.Jansen D.T.Holyoak E.Portela-Pereira P.Pereira"" |
| 719 | "Poaceae;"Periballia involucrata"";"Autóctone"";"Endémica da Península Ibérica"";"30;"A.Silva""                                           |
| 720 | "Poaceae;"Poa annua"";"Autóctone"";"228;"A.Silva D.T.Holyoak P.Silveira""                                                                 |
| 721 | "Poaceae;"Poa bulbosa"";"Autóctone"";"204;"P.Silveira D.T.Holyoak F.Clamote J.Jansen A.Silva""                                            |
| 722 | "Poaceae;"Poa trivialis subsp. trivialis"";"Autóctone"";"64;"E.Portela-Pereira""                                                          |
| 723 | "Poaceae;"Poa trivialis"";"117;"A.Silva D.T.Holyoak""                                                                                     |
| 724 | "Poaceae;"Polypogon monspeliensis"";"Autóctone"";"104;"A.Silva""                                                                          |
| 725 | "Poaceae;"Setaria pumila"";"Autóctone"";"35;"A.Silva""                                                                                    |
| 726 | "Poaceae;"Stipa gigantea"";"Autóctone"";"214;"A.Carapeto F.Clamote J.Costa A.Silva E.Portela-Pereira J.Jansen D.T.Holyoak""               |
| 727 | "Poaceae;"Trisetaria hispida"";"Autóctone"";"Endémica da Península Ibérica"";"NT";5;"J.Jansen M.Porto E.Portela-Pereira A.Silva A.Matos"" |
| 728 | "Poaceae;"Trisetaria ovata"";"Autóctone"";"Endémica da Península Ibérica"";"26;"D.T.Holyoak A.Silva""                                     |
| 729 | "Poaceae;"Vulpia bromoides"";"Autóctone"";"69;"D.T.Holyoak""                                                                              |
| 730 | "Poaceae;"Vulpia myuros"";"Autóctone"";"136;"P.Silveira D.T.Holyoak""                                                                     |
| 731 | "Polygalaceae;"Polygala microphylla"";"Autóctone"";"LC";65;"A.Silva P.Silveira J.Jansen M.Porto""                                         |
| 732 | "Polygalaceae;"Polygala serpyllifolia"";"Autóctone"";"37;"M.Porto F.Clamote A.Silva D.T.Holyoak""                                         |
| 733 | "Polygalaceae;"Polygala vulgaris"";"Autóctone"";"182;"A.Silva F.Clamote M.Porto J.Jansen J.D.Almeida P.Beja""                             |

|     |                                                                                                                                                                                        |
|-----|----------------------------------------------------------------------------------------------------------------------------------------------------------------------------------------|
| 734 | "Polygonaceae;" "Fallopia convolvulus"; "Autóctone"; " "; " "; " "; 115; "F.Clamote A.Silva" "                                                                                         |
| 735 | "Polygonaceae;" "Polygonum arenastrum"; "Autóctone"; " "; " "; " "; 40; "J.D.Almeida" "                                                                                                |
| 736 | "Polygonaceae;" "Polygonum aviculare"; "Autóctone"; " "; " "; " "; 234; "F.Clamote D.T.Holyoak" "                                                                                      |
| 737 | "Polygonaceae;" "Polygonum hydropiper"; "Autóctone"; " "; " "; " "; 146; "F.Clamote" "                                                                                                 |
| 738 | "Polygonaceae;" "Polygonum lapathifolium"; "Autóctone"; " "; " "; " "; 139; "F.Clamote" "                                                                                              |
| 739 | "Polygonaceae;" "Polygonum persicaria"; "Autóctone"; " "; " "; " "; 283; "A.Silva E.Portela-Pereira F.Clamote J.D.Almeida" "                                                           |
| 740 | "Polygonaceae;" "Rumex acetosa subsp. acetosa"; "Autóctone"; " "; " "; " "; 206; "J.D.Almeida A.Silva E.Portela-Pereira F.Clamote" "                                                   |
| 741 | "Polygonaceae;" "Rumex acetosella subsp. angiocarpus"; "Autóctone"; " "; " "; " "; 341; "E.Portela-Pereira P.Silveira F.Clamote J.Jansen A.Silva J.D.Almeida D.T.Holyoak P.V.Araújo" " |
| 742 | "Polygonaceae;" "Rumex bucephalophorus"; " "; " "; " "; " "; 443; "A.Silva A.Carapeto J.Jansen" "                                                                                      |
| 743 | "Polygonaceae;" "Rumex conglomeratus"; "Autóctone"; " "; " "; " "; 234; "E.Portela-Pereira" "                                                                                          |
| 744 | "Polygonaceae;" "Rumex crispus"; "Autóctone"; " "; " "; " "; 197; "A.Silva" "                                                                                                          |
| 745 | "Polygonaceae;" "Rumex induratus"; "Autóctone"; " "; " "; " "; 330; "F.Clamote J.D.Almeida A.Silva P.V.Araújo" "                                                                       |
| 746 | "Polygonaceae;" "Rumex obtusifolius"; "Autóctone"; " "; " "; " "; 107; "J.T.Tavares A.Silva" "                                                                                         |
| 747 | "Polygonaceae;" "Rumex suffruticosus"; "Autóctone"; "Endêmica da Península Ibérica"; " "; "VU"; 2; "J.Jansen P.Pereira A.Silva M.Porto A.Carapeto F.Clamote A.Matos" "                 |
| 748 | "Polypodiaceae;" "Polypodium cambricum subsp. cambricum"; "Autóctone"; " "; " "; " "; 265; "A.Silva F.Clamote" "                                                                       |
| 749 | "Polypodiaceae;" "Polypodium interjectum"; "Autóctone"; " "; " "; " "; 132; "A.Carapeto E.Portela-Pereira" "                                                                           |
| 750 | "Polypodiaceae;" "Polypodium vulgare"; "Autóctone"; " "; " "; " "; 82; "A.Silva" "                                                                                                     |
| 751 | "Portulacaceae;" "Montia fontana subsp. amporitana"; "Autóctone"; " "; " "; " "; 16; "A.Silva P.Silveira D.T.Holyoak" "                                                                |
| 752 | "Portulacaceae;" "Montia fontana"; " "; " "; " "; " "; 143; "F.Clamote A.Silva M.Porto P.Beja P.V.Araújo" "                                                                            |
| 753 | "Portulacaceae;" "Portulaca oleracea"; " "; " "; " "; " "; 260; "J.D.Almeida" "                                                                                                        |
| 754 | "Potamogetonaceae;" "Potamogeton polygonifolius"; "Autóctone"; " "; " "; " "; 65; "A.Silva" "                                                                                          |
| 755 | "Primulaceae;" "Anagallis arvensis"; "Autóctone"; " "; " "; " "; 580; "A.Silva J.D.Almeida" "                                                                                          |
| 756 | "Primulaceae;" "Anagallis tenella"; "Autóctone"; " "; " "; " "; 165; "A.Silva F.Clamote J.Jansen P.V.Araújo M.Porto" "                                                                 |
| 757 | "Primulaceae;" "Asterolinon linum-stellatum"; "Autóctone"; " "; " "; " "; 283; "F.Clamote J.D.Almeida J.Jansen" "                                                                      |

|     |                                                                                                                                                                                                                                             |
|-----|---------------------------------------------------------------------------------------------------------------------------------------------------------------------------------------------------------------------------------------------|
| 758 | "Primulaceae;" "Primula acaulis subsp. acaulis"; "Autóctone"; " "; " "; " "; 140; "A.Silva F.Clamote J.D.Almeida M.Porto"                                                                                                                   |
| 759 | "Proteaceae;" "Hakea sericea"; "Introduzida"; "Exótica"; " "; " "; 64; "A.Silva"                                                                                                                                                            |
| 760 | "Pteridaceae;" "Adiantum capillus-veneris"; "Autóctone"; " "; " "; " "; 101; "F.Clamote"                                                                                                                                                    |
| 761 | "Pteridaceae;" "Anogramma leptophylla"; "Autóctone"; " "; " "; " "; 412; "A.Silva A.Carapeto F.Clamote P.V.Araújo J.Jansen"                                                                                                                 |
| 762 | "Pteridaceae;" "Cheilanthes hispanica"; "Autóctone"; " "; " "; " "; 70; "A.Silva"                                                                                                                                                           |
| 763 | "Pteridaceae;" "Cheilanthes tinaei"; "Autóctone"; " "; " "; " "; 86; "P.Silveira"                                                                                                                                                           |
| 764 | "Pteridaceae;" "Cryptogramma crispa"; "Autóctone"; " "; " "; "VU"; 1; "J.Jansen P.V.Araújo A.Silva A.Matos F.Covelo"                                                                                                                        |
| 765 | "Ranunculaceae;" "Aquilegia vulgaris subsp. dichroa"; "Autóctone"; "Endémica da Península Ibérica"; " "; " "; 113; "A.Silva E.Portela-Pereira P.V.Araújo"                                                                                   |
| 766 | "Ranunculaceae;" "Aquilegia vulgaris"; " "; " "; " "; " "; 168; "F.Clamote A.Carapeto"                                                                                                                                                      |
| 767 | "Ranunculaceae;" "Caltha palustris"; "Autóctone"; " "; " "; " "; 32; "J.Jansen A.Silva"                                                                                                                                                     |
| 768 | "Ranunculaceae;" "Delphinium halteratum subsp. halteratum"; "Autóctone"; " "; " "; " "; 2; "P.V.Araújo"                                                                                                                                     |
| 769 | "Ranunculaceae;" "Delphinium halteratum subsp. verdunense"; "Autóctone"; " "; " "; " "; 16; "E.Portela-Pereira"                                                                                                                             |
| 770 | "Ranunculaceae;" "Ranunculus abnormis"; "Autóctone"; "Endémica da Península Ibérica"; " "; "VU"; 6; "A.Silva J.Jansen S.Ribeiro"                                                                                                            |
| 771 | "Ranunculaceae;" "Ranunculus bulbosus subsp. aleae"; "Autóctone"; " "; " "; " "; 96; "J.Jansen A.Silva E.Portela-Pereira D.T.Holyoak F.Clamote"                                                                                             |
| 772 | "Ranunculaceae;" "Ranunculus bulbosus"; " "; " "; " "; " "; 189; "A.Silva"                                                                                                                                                                  |
| 773 | "Ranunculaceae;" "Ranunculus bupleuroides"; "Autóctone"; "Endémica da Península Ibérica"; " "; " "; 59; "A.Silva J.Jansen"                                                                                                                  |
| 774 | "Ranunculaceae;" "Ranunculus ficaria subsp. ficaria"; "Autóctone"; " "; " "; " "; 235; "A.Silva P.Beja"                                                                                                                                     |
| 775 | "Ranunculaceae;" "Ranunculus flammula"; "Autóctone"; " "; " "; " "; 84; "A.Silva F.Clamote J.Jansen"                                                                                                                                        |
| 776 | "Ranunculaceae;" "Ranunculus hederaceus"; "Autóctone"; " "; " "; " "; 11; "J.Jansen"                                                                                                                                                        |
| 777 | "Ranunculaceae;" "Ranunculus henriquesii"; "Endémica"; "Endémica de Portugal continental"; " "; "VU"; 18; "A.Silva F.Clamote"                                                                                                               |
| 778 | "Ranunculaceae;" "Ranunculus nigrescens"; "Autóctone"; "Endémica da Península Ibérica"; " "; " "; 53; "J.Jansen A.Silva J.D.Almeida D.T.Holyoak P.V.Araújo E.Portela-Pereira S.Ribeiro F.Clamote M.Porto P.Silveira A.Carapeto J.T.Tavares" |
| 779 | "Ranunculaceae;" "Ranunculus ollissiponensis subsp. ollissiponensis"; "Autóctone"; "Endémica da Península Ibérica"; " "; " "; 167; "J.Jansen P.V.Araújo A.Silva F.Clamote J.D.Almeida P.Silveira"                                           |

|     |                                                                                                                                                                |
|-----|----------------------------------------------------------------------------------------------------------------------------------------------------------------|
| 780 | "Ranunculaceae;" "Ranunculus ololeucos" ;"Autóctone" ;"" ;"" ;"" ;13;"S.Ribeiro F.Clamote M.Porto A.Silva D.T.Holyoak J.Jansen" ""                             |
| 781 | "Ranunculaceae;" "Ranunculus omiophyllus" ;"Autóctone" ;"" ;"" ;"" ;73;"A.Silva J.Jansen P.Silveira" ""                                                        |
| 782 | "Ranunculaceae;" "Ranunculus paludosus" ;"Autóctone" ;"" ;"" ;"" ;123;"B.Moreira" ""                                                                           |
| 783 | "Ranunculaceae;" "Ranunculus pseudofluitans" ;"Autóctone" ;"" ;"" ;"" ;9;"E.Portela-Pereira" ""                                                                |
| 784 | "Ranunculaceae;" "Ranunculus repens" ;"Autóctone" ;"" ;"" ;"" ;227;"A.Silva E.Portela-Pereira F.Clamote J.Jansen" ""                                           |
| 785 | "Ranunculaceae;" "Thalictrum speciosissimum" ;"Autóctone" ;"" ;"" ;"" ;166;"A.Silva J.Jansen" ""                                                               |
| 786 | "Resedaceae;" "Reseda gredensis" ;"Autóctone" ;"Endémica da Península Ibérica" ;"" ;"EN" ;1;"A.Silva A.Matos J.Jansen M.Porto" ""                              |
| 787 | "Resedaceae;" "Reseda luteola" ;"Autóctone" ;"" ;"" ;"" ;216;"A.Silva F.Clamote" ""                                                                            |
| 788 | "Resedaceae;" "Reseda media" ;"Autóctone" ;"" ;"" ;"" ;213;"A.Silva M.Porto P.Beja" ""                                                                         |
| 789 | "Resedaceae;" "Sesamoides purpurascens" ;"Autóctone" ;"" ;"" ;"" ;241;"D.T.Holyoak J.D.Almeida A.Silva P.Silveira J.Jansen" ""                                 |
| 790 | "Resedaceae;" "Sesamoides suffruticosa" ;"" ;"" ;"" ;"" ;102;"P.Silveira D.T.Holyoak F.Clamote M.Porto A.Silva J.Jansen" ""                                    |
| 791 | "Rhamnaceae;" "Frangula alnus" ;"Autóctone" ;"" ;"" ;"" ;324;"E.Portela-Pereira J.Jansen F.Clamote A.Silva P.Silveira M.Porto J.T.Tavares" ""                  |
| 792 | "Rosaceae;" "Agrimonia eupatoria" ;"" ;"" ;"" ;"" ;158;"A.Silva" ""                                                                                            |
| 793 | "Rosaceae;" "Alchemilla transiens" ;"Autóctone" ;"" ;"" ;"" "CR" ;1;"A.Carapeto A.Matos C.Aguiar C.Meireles A.Silva J.Jansen F.Clamote M.Porto J.D.Almeida" "" |
| 794 | "Rosaceae;" "Aphanes australis" ;"Autóctone" ;"" ;"" ;"" ;133;"J.Jansen" ""                                                                                    |
| 795 | "Rosaceae;" "Crataegus monogyna" ;"Autóctone" ;"" ;"" ;"" ;539;"E.Portela-Pereira F.Clamote A.Silva J.T.Tavares J.Jansen P.V.Araújo P.Beja" ""                 |
| 796 | "Rosaceae;" "Fragaria vesca subsp. vesca" ;"Autóctone" ;"" ;"" ;"" ;115;"A.Silva P.Beja J.D.Almeida M.Porto" ""                                                |
| 797 | "Rosaceae;" "Geum sylvaticum" ;"Autóctone" ;"" ;"" ;"" ;93;"P.Beja A.Silva M.Porto" ""                                                                         |
| 798 | "Rosaceae;" "Geum urbanum" ;"Autóctone" ;"" ;"" ;"" ;72;"A.Silva E.Portela-Pereira" ""                                                                         |
| 799 | "Rosaceae;" "Potentilla erecta" ;"Autóctone" ;"" ;"" ;"" ;203;"D.T.Holyoak M.Porto F.Clamote A.Silva P.V.Araújo P.Beja J.Jansen E.Portela-Pereira" ""          |
| 800 | "Rosaceae;" "Prunus avium" ;"Autóctone" ;"" ;"" ;"" ;120;"P.V.Araújo A.Silva E.Portela-Pereira J.Jansen P.Ministro" ""                                         |
| 801 | "Rosaceae;" "Prunus insititia" ;"Autóctone" ;"" ;"" ;"" ;36;"E.Portela-Pereira E.Marabuto" ""                                                                  |
| 802 | "Rosaceae;" "Prunus lusitanica subsp. lusitanica" ;"Autóctone" ;"" ;"" ;"" "NT" ;29;"A.Silva M.Raposo J.Costa M.Porto J.Jansen" ""                             |

|     |                                                                                                                                                                                |
|-----|--------------------------------------------------------------------------------------------------------------------------------------------------------------------------------|
| 803 | "Rosaceae;" "Prunus spinosa"; "Autóctone"; " "; " "; " "; " "; 115; "A.Silva J.Jansen"                                                                                         |
| 804 | "Rosaceae;" "Rosa canina"; "Autóctone"; " "; " "; " "; " "; 125; "A.Silva E.Portela-Pereira"                                                                                   |
| 805 | "Rosaceae;" "Rosa corymbifera"; "Autóctone"; " "; " "; " "; " "; 35; "A.Silva"                                                                                                 |
| 806 | "Rosaceae;" "Rosa pouzinii"; "Autóctone"; " "; " "; " "; " "; 59; "A.Silva E.Portela-Pereira"                                                                                  |
| 807 | "Rosaceae;" "Rosa rubiginosa"; "Autóctone"; " "; " "; " "; "CR"; 1; "A.Silva"                                                                                                  |
| 808 | "Rosaceae;" "Rosa squarrosa"; "Autóctone"; " "; " "; " "; " "; 41; "E.Portela-Pereira"                                                                                         |
| 809 | "Rosaceae;" "Rubus genevieri"; "Autóctone"; " "; " "; "Anexo V"; "VU"; 11; "P.R.González"                                                                                      |
| 810 | "Rosaceae;" "Rubus henriquesii"; "Autóctone"; "Endémica da Península Ibérica"; " "; " "; 28; "A.Silva J.D.Almeida"                                                             |
| 811 | "Rosaceae;" "Rubus peratticus"; "Autóctone"; "Endémica da Península Ibérica"; " "; " "; 9; "E.Portela-Pereira"                                                                 |
| 812 | "Rosaceae;" "Rubus radula"; "Autóctone"; " "; " "; " "; " "; 7; "E.Portela-Pereira"                                                                                            |
| 813 | "Rosaceae;" "Rubus ulmifolius var. ulmifolius"; "Autóctone"; " "; " "; " "; " "; 652; "E.Portela-Pereira A.Silva J.D.Almeida M.Porto"                                          |
| 814 | "Rosaceae;" "Rubus vagabundus"; "Autóctone"; "Endémica da Península Ibérica"; " "; " "; 7; "E.Portela-Pereira"                                                                 |
| 815 | "Rosaceae;" "Sanguisorba verrucosa"; "Autóctone"; " "; " "; " "; " "; 443; "A.Silva J.Jansen F.Clamote"                                                                        |
| 816 | "Rosaceae;" "Sorbus aria"; "Autóctone"; " "; " "; " "; "CR"; 4; "E.Portela-Pereira"                                                                                            |
| 817 | "Rosaceae;" "Sorbus aucuparia"; "Autóctone"; " "; " "; " "; " "; 29; "E.Portela-Pereira A.Silva S.Ribeiro F.Clamote P.V.Araújo J.T.Tavares D.T.Holyoak J.D.Almeida A.Carapeto" |
| 818 | "Rosaceae;" "Sorbus latifolia"; "Autóctone"; " "; " "; " "; "VU"; 20; "A.Silva A.Matos J.Jansen J.Costa"                                                                       |
| 819 | "Rosaceae;" "Sorbus torminalis"; "Autóctone"; " "; " "; " "; "VU"; 10; "A.Silva"                                                                                               |
| 820 | "Rubiaceae;" "Crucianella angustifolia"; "Autóctone"; " "; " "; " "; " "; 225; "M.Porto A.Silva F.Clamote D.T.Holyoak"                                                         |
| 821 | "Rubiaceae;" "Galium aparine subsp. aparine"; "Autóctone"; " "; " "; " "; " "; 195; "E.Portela-Pereira J.D.Almeida"                                                            |
| 822 | "Rubiaceae;" "Galium aparine"; " "; " "; " "; " "; 609; "A.Silva F.Clamote"                                                                                                    |
| 823 | "Rubiaceae;" "Galium broterianum"; "Autóctone"; "Endémica da Península Ibérica"; " "; " "; 150; "E.Portela-Pereira J.Jansen A.Silva F.Clamote P.V.Araújo"                      |
| 824 | "Rubiaceae;" "Galium lucidum subsp. lucidum"; "Autóctone"; " "; " "; " "; " "; 35; "P.V.Araújo F.Clamote"                                                                      |
| 825 | "Rubiaceae;" "Galium mollugo subsp. erectum"; "Autóctone"; " "; " "; " "; " "; 19; "E.Portela-Pereira F.Clamote"                                                               |
| 826 | "Rubiaceae;" "Galium mollugo subsp. mollugo"; "Autóctone"; " "; " "; " "; " "; 30; "E.Portela-Pereira"                                                                         |
| 827 | "Rubiaceae;" "Galium mollugo"; " "; " "; " "; " "; 122; "A.Silva D.T.Holyoak"                                                                                                  |

|     |                                                                                                                                                           |
|-----|-----------------------------------------------------------------------------------------------------------------------------------------------------------|
| 828 | "Rubiaceae;"Galium palustre var. palustre";"Autóctone";"";"";"";"15;"J.Jansen""                                                                           |
| 829 | "Rubiaceae;"Galium palustre";"";"";"";"";"";"157;"A.Silva""                                                                                               |
| 830 | "Rubiaceae;"Galium rotundifolium";"Autóctone";"";"";"";"25;"P.Pereira A.Silva E.Portela-Pereira P.Guillaumeau P.V.Araújo""                                |
| 831 | "Rubiaceae;"Galium saxatile var. saxatile";"Autóctone";"";"";"";"7;"J.Jansen A.Silva""                                                                    |
| 832 | "Rubiaceae;"Galium saxatile var. vivianum";"Autóctone";"";"";"";"11;"J.Jansen P.V.Araújo A.Silva""                                                        |
| 833 | "Rubiaceae;"Galium saxatile";"";"";"";"";"81;"A.Silva P.V.Araújo F.Clamote D.T.Holyoak P.Pereira""                                                        |
| 834 | "Rubiaceae;"Galium verum subsp. verum";"Autóctone";"";"";"";"45;"A.Silva""                                                                                |
| 835 | "Rubiaceae;"Rubia peregrina";"Autóctone";"";"";"";"467;"M.Porto J.Jansen A.Silva J.D.Almeida F.Clamote E.Portela-Pereira""                                |
| 836 | "Rubiaceae;"Sherardia arvensis";"Autóctone";"";"";"";"470;"F.Clamote A.Silva P.Beja""                                                                     |
| 837 | "Salicaceae;"Populus nigra var. nigra";"Introduzida";"Exótica";"";"";"30;"E.Portela-Pereira""                                                             |
| 838 | "Salicaceae;"Populus nigra";"Introduzida";"";"";"";"158;"A.Silva E.Portela-Pereira""                                                                      |
| 839 | "Salicaceae;"Salix atrocinerea";"Autóctone";"";"";"";"503;"E.Portela-Pereira D.T.Holyoak A.Silva P.Silveira P.V.Araújo J.Jansen J.D.Almeida""             |
| 840 | "Salicaceae;"Salix fragilis";"Introduzida";"Exótica";"";"";"31;"E.Portela-Pereira""                                                                       |
| 841 | "Salicaceae;"Salix neotricha";"Autóctone";"";"";"";"30;"E.Portela-Pereira""                                                                               |
| 842 | "Salicaceae;"Salix salviifolia subsp. salviifolia";"Autóctone";"Endêmica da Península Ibérica";"";"";"147;"E.Portela-Pereira P.V.Araújo""                 |
| 843 | "Salicaceae;"Salix salviifolia";"";"";"";"";"399;"D.T.Holyoak J.D.Almeida P.V.Araújo A.Silva A.Carapeto P.Silveira""                                      |
| 844 | "Santalaceae;"Osyris alba";"Autóctone";"";"";"";"340;"A.Silva M.Porto J.Jansen J.D.Almeida""                                                              |
| 845 | "Santalaceae;"Thesium humifusum";"Autóctone";"";"";"";"34;"A.Silva J.D.Almeida""                                                                          |
| 846 | "Santalaceae;"Thesium pyrenaicum subsp. pyrenaicum";"Autóctone";"";"";"";"18;"J.D.Almeida""                                                               |
| 847 | "Sapindaceae;"Acer pseudoplatanus";"Autóctone";"";"";"";"90;"F.Clamote E.Portela-Pereira J.T.Tavares A.Silva C.Meireles A.Carapeto P.Pereira P.V.Araújo"" |
| 848 | "Saxifragaceae;"Chrysosplenium oppositifolium";"Autóctone";"";"";"";"42;"J.Jansen A.Silva P.Pereira F.Clamote M.Porto P.V.Araújo A.Carapeto""             |
| 849 | "Saxifragaceae;"Saxifraga fragosoi";"Autóctone";"";"";"";"70;"A.Silva F.Clamote P.Pereira M.Porto P.V.Araújo J.D.Almeida E.Portela-Pereira""              |
| 850 | "Saxifragaceae;"Saxifraga granulata";"Autóctone";"";"";"";"298;"A.Silva D.T.Holyoak P.V.Araújo P.Beja F.Clamote""                                         |

|     |                                                                                                                                                                                                                                         |
|-----|-----------------------------------------------------------------------------------------------------------------------------------------------------------------------------------------------------------------------------------------|
| 851 | "Saxifragaceae;" "Saxifraga spathularis" ; "Autóctone" ; " " ; " " ; " " ; 66 ; "J.D.Almeida A.Carapeto A.Silva F.Clamote P.V.Araújo D.T.Holyoak M.Porto J.T.Tavares E.Portela-Pereira J.Jansen P.Pereira P.Ministro P.Guillaumeau" " " |
| 852 | "Saxifragaceae;" "Saxifraga stellaris" ; "Autóctone" ; " " ; " " ; "VU" ; 1 ; "J.Jansen A.Silva J.D.Almeida D.T.Holyoak A.Matos A.Carapeto F.Clamote P.V.Araújo" " "                                                                    |
| 853 | "Scrophulariaceae;" "Scrophularia auriculata subsp. auriculata" ; "Autóctone" ; " " ; " " ; " " ; 181 ; "A.Silva" " "                                                                                                                   |
| 854 | "Scrophulariaceae;" "Scrophularia canina subsp. canina" ; "Autóctone" ; " " ; " " ; " " ; 157 ; "F.Clamote A.Silva" " "                                                                                                                 |
| 855 | "Scrophulariaceae;" "Scrophularia herminii" ; "Autóctone" ; "Endémica da Península Ibérica" ; "Anexo V" ; "LC" ; 26 ; "E.Portela-Pereira J.Jansen A.Silva M.Porto P.Pereira F.Clamote J.D.Almeida" " "                                  |
| 856 | "Scrophulariaceae;" "Scrophularia schousboei" ; "Autóctone" ; "Endémica da Península Ibérica" ; "Anexo V" ; " " ; 18 ; "A.Silva J.Jansen" " "                                                                                           |
| 857 | "Scrophulariaceae;" "Scrophularia scorodonia" ; " " ; " " ; " " ; " " ; 299 ; "F.Clamote A.Silva P.V.Araújo E.Portela-Pereira" " "                                                                                                      |
| 858 | "Scrophulariaceae;" "Verbascum pulverulentum" ; "Autóctone" ; " " ; " " ; " " ; 112 ; "E.Portela-Pereira F.Clamote A.Silva E.Marabuto" " "                                                                                              |
| 859 | "Scrophulariaceae;" "Verbascum simplex" ; "Autóctone" ; " " ; " " ; " " ; 38 ; "E.Portela-Pereira" " "                                                                                                                                  |
| 860 | "Scrophulariaceae;" "Verbascum sinuatum" ; "Autóctone" ; " " ; " " ; " " ; 231 ; "A.Silva" " "                                                                                                                                          |
| 861 | "Scrophulariaceae;" "Verbascum thapsus" ; "Autóctone" ; " " ; " " ; " " ; 61 ; "A.Silva F.Clamote" " "                                                                                                                                  |
| 862 | "Scrophulariaceae;" "Verbascum virgatum" ; "Autóctone" ; " " ; " " ; " " ; 141 ; "F.Clamote" " "                                                                                                                                        |
| 863 | "Simaroubaceae;" "Ailanthus altissima" ; "Introduzida" ; "Exótica" ; " " ; " " ; 156 ; "F.Clamote A.Carapeto A.Silva" " "                                                                                                               |
| 864 | "Solanaceae;" "Solanum chenopodioides" ; "Introduzida" ; "Exótica" ; " " ; " " ; 166 ; "A.Silva" " "                                                                                                                                    |
| 865 | "Solanaceae;" "Solanum dulcamara" ; "Autóctone" ; " " ; " " ; " " ; 167 ; "P.V.Araújo F.Clamote E.Portela-Pereira" " "                                                                                                                  |
| 866 | "Solanaceae;" "Solanum nigrum" ; "Autóctone" ; " " ; " " ; " " ; 398 ; "A.Silva J.D.Almeida F.Clamote" " "                                                                                                                              |
| 867 | "Taxaceae;" "Taxus baccata" ; "Autóctone" ; " " ; " " ; "EN" ; 12 ; "E.Portela-Pereira A.Silva A.Carapeto F.Clamote J.Jansen S.Ribeiro D.T.Holyoak J.M.R.P.† M.Porto" " "                                                               |
| 868 | "Thymelaeaceae;" "Daphne gnidium" ; "Autóctone" ; " " ; " " ; " " ; 635 ; "A.Silva F.Clamote M.Porto P.Beja P.V.Araújo" " "                                                                                                             |
| 869 | "Thymelaeaceae;" "Thymelaea coridifolia subsp. dendrobryum" ; "Autóctone" ; "Endémica da Península Ibérica" ; " " ; "EN" ; 1 ; "C.Meireles J.Jansen A.Silva D.T.Holyoak A.Matos P.Pereira P.V.Araújo" " "                               |
| 870 | "Typhaceae;" "Sparganium angustifolium" ; "Autóctone" ; " " ; " " ; "CR" ; 1 ; "A.Silva J.Jansen A.Matos" " "                                                                                                                           |



|     |                                                                                                                                                                                         |
|-----|-----------------------------------------------------------------------------------------------------------------------------------------------------------------------------------------|
| 871 | "Typhaceae;"Typha latifolia";"Autóctone";"";"";"";"117;"A.Silva""                                                                                                                       |
| 872 | "Ulmaceae;"Ulmus glabra";"Introduzida";"Exótica";"";"";"18;"A.Silva""                                                                                                                   |
| 873 | "Ulmaceae;"Ulmus minor";"Autóctone";"";"";"";"172;"A.Silva E.Portela-Pereira P.V.Araújo""                                                                                               |
| 874 | "Urticaceae;"Parietaria judaica";"Autóctone";"";"";"";"306;"A.Silva M.Porto""                                                                                                           |
| 875 | "Urticaceae;"Urtica dioica";"Autóctone";"";"";"";"308;"D.T.Holyoak A.Silva E.Portela-Pereira F.Clamote J.T.Tavares J.Jansen""                                                           |
| 876 | "Urticaceae;"Urtica membranacea";"Autóctone";"";"";"";"294;"E.Portela-Pereira J.D.Almeida""                                                                                             |
| 877 | "Urticaceae;"Urtica urens";"Autóctone";"";"";"";"105;"P.Beja""                                                                                                                          |
| 878 | "Valerianaceae;"Centranthus calcitrapae var. calcitrapae";"Autóctone";"";"";"";"498;"A.Silva F.Clamote D.T.Holyoak J.Jansen P.V.Araújo""                                                |
| 879 | "Valerianaceae;"Centranthus ruber subsp. ruber";"Autóctone";"";"";"";"55;"A.Silva""                                                                                                     |
| 880 | "Verbenaceae;"Verbena officinalis";"Autóctone";"";"";"";"312;"F.Clamote A.Silva J.T.Tavares""                                                                                           |
| 881 | "Violaceae;"Viola arvensis";"Autóctone";"";"";"";"11;"J.Jansen""                                                                                                                        |
| 882 | "Violaceae;"Viola kitaibeliana";"Autóctone";"";"";"";"190;"P.Beja A.Silva""                                                                                                             |
| 883 | "Violaceae;"Viola langeana";"Autóctone";"Endêmica da Península Ibérica";"";"LC";"16;"J.Jansen M.Porto F.Clamote P.Pereira A.Silva A.Carapeto P.Silveira D.T.Holyoak P.V.Araújo P.Beja"" |
| 884 | "Violaceae;"Viola palustris subsp. palustris";"Autóctone";"";"";"";"79;"A.Silva E.Portela-Pereira J.Jansen S.Ribeiro""                                                                  |
| 885 | "Violaceae;"Viola riviniana";"Autóctone";"";"";"";"301;"P.Beja E.Portela-Pereira A.Silva F.Clamote J.Jansen M.Porto A.Carapeto P.V.Araújo""                                             |
| 886 | "Vitaceae;"Vitis vinifera subsp. sylvestris";"Autóctone";"";"";"";"55;"J.T.Tavares""                                                                                                    |
| 887 | "Woodsiaceae;"Athyrium filix-femina";"Autóctone";"";"";"";"256;"E.Portela-Pereira F.Clamote A.Silva J.T.Tavares D.T.Holyoak P.V.Araújo J.Jansen P.Ministro""                            |
| 888 | "Woodsiaceae;"Cystopteris dickieana";"Autóctone";"";"";"";"6;"D.T.Holyoak P.Ministro F.Clamote""                                                                                        |
| 889 | "Woodsiaceae;"Cystopteris fragilis subsp. fragilis";"Autóctone";"";"";"";"7;"A.Silva D.T.Holyoak J.Jansen""                                                                             |
| 890 | "Woodsiaceae;"Cystopteris viridula";"Autóctone";"";"";"";"83;"F.Clamote A.Silva""                                                                                                       |
| 891 | "Xanthorrhoeaceae;"Asphodelus albus subsp. villarsii";"Autóctone";"";"";"";"8;"A.Silva P.Pereira""                                                                                      |
| 892 | "Xanthorrhoeaceae;"Asphodelus lusitanicus";"";"";"";"70;"F.Clamote""                                                                                                                    |
| 893 | "Xanthorrhoeaceae;"Simethis mattiazzi";"Autóctone";"";"";"";"223;"J.D.Almeida P.Silveira M.Porto J.Jansen A.Silva""                                                                     |
