# Supplementary material for: Overview of Ethnobotanical–Pharmacological Studies Carried Out on Medicinal Plants from the Serra da Estrela Natural Park: Focus on Their Antidiabetic Potential
Source: MDPI journal article supplement (doi:10.3390/pharmaceutics16040454), 2024-03-25
Supplement: s1 [file s1]

**Supplementary Tables S2:** Analysis of the plant number with anti-diabetic potential in Serra da Estrela Natural Park. (Group A, B, C and D).

|    | Family          | Total number of species | Number of species with anti-diabetic potential | Group A.<br>Number of families with more than three plants with anti-diabetic potential (13 families/85 species). |
|----|-----------------|-------------------------|------------------------------------------------|-------------------------------------------------------------------------------------------------------------------|
| 1  | Asteraceae      | 108                     | 21                                             |                                                                                                                   |
| 2  | Lamiaceae       | 29                      | 12                                             |                                                                                                                   |
| 3  | Fabaceae        | 74                      | 9                                              |                                                                                                                   |
| 4  | Rosaceae        | 28                      | 8                                              |                                                                                                                   |
| 5  | Caryophyllaceae | 60                      | 6                                              |                                                                                                                   |
| 6  | Polygalaceae    | 22                      | 5                                              |                                                                                                                   |
| 7  | Apiaceae        | 29                      | 4                                              |                                                                                                                   |
| 8  | Asparagaceae    | 13                      | 4                                              |                                                                                                                   |
| 9  | Ericaceae       | 13                      | 4                                              |                                                                                                                   |
| 10 | Boraginaceae    | 13                      | 3                                              |                                                                                                                   |
| 11 | Geraniaceae     | 9                       | 3                                              |                                                                                                                   |
| 12 | Hypericaceae    | 8                       | 3                                              |                                                                                                                   |
| 13 | Fagaceae        | 7                       | 3                                              |                                                                                                                   |

**Group B.** Number of families with only two plants with anti-diabetic potential (12 families/24 species).

|    | <b>Family</b>    | <b>Total number of species</b> | <b>Number of species with anti-diabetic potential</b> |
|----|------------------|--------------------------------|-------------------------------------------------------|
| 1  | Brassicaceae     | 33                             | 2                                                     |
| 2  | Cistaceae        | 16                             | 2                                                     |
| 3  | Amaryllidaceae   | 15                             | 2                                                     |
| 4  | Scrophulariaceae | 10                             | 2                                                     |
| 5  | Papaveraceae     | 9                              | 2                                                     |
| 6  | Caprifoliaceae   | 5                              | 2                                                     |
| 7  | Gentianaceae     | 5                              | 2                                                     |
| 8  | Urticaceae       | 3                              | 2                                                     |
| 9  | Malvaceae        | 3                              | 2                                                     |
| 10 | Cupressaceae     | 2                              | 2                                                     |
| 11 | Cytinaceae       | 2                              | 2                                                     |
| 12 | Pinaceae         | 2                              | 2                                                     |

**Group C.** Number of families with only one plant with anti-diabetic potential (30 families/30 species).

|   | <b>Family</b> | <b>Total number of species</b> | <b>Number of species with anti-diabetic potential</b> |
|---|---------------|--------------------------------|-------------------------------------------------------|
| 1 | Pteridaceae   | 6                              | 1                                                     |
| 2 | Poaceae       | 81                             | 1                                                     |
| 3 | Juncaceae     | 18                             | 1                                                     |
| 4 | Rubiaceae     | 17                             | 1                                                     |

|    |                 |    |   |
|----|-----------------|----|---|
| 5  | Campanulaceae   | 11 | 1 |
| 6  | Dryopteridaceae | 7  | 1 |
| 7  | Betulaceae      | 4  | 1 |
| 8  | Primulaceae     | 4  | 1 |
| 9  | Portulacaceae   | 3  | 1 |
| 10 | Oleaceae        | 3  | 1 |
| 11 | Solanaceae      | 3  | 1 |
| 12 | Amaranthaceae   | 2  | 1 |
| 13 | Lycopodiaceae   | 2  | 1 |
| 14 | Lythraceae      | 2  | 1 |
| 15 | Thymelaeaceae   | 2  | 1 |
| 16 | Ulmaceae        | 2  | 1 |
| 17 | Lauraceae       | 1  | 1 |
| 18 | Cannabaceae     | 1  | 1 |
| 19 | Convolvulaceae  | 1  | 1 |
| 20 | Cucurbitaceae   | 1  | 1 |
| 21 | Dioscoreaceae   | 1  | 1 |
| 22 | Moraceae        | 1  | 1 |
| 23 | Myrtaceae       | 1  | 1 |
| 24 | Oxalidaceae     | 1  | 1 |
| 25 | Phytolaccaceae  | 1  | 1 |
| 26 | Simaroubaceae   | 1  | 1 |
| 27 | Taxaceae        | 1  | 1 |
| 28 | Verbenaceae     | 1  | 1 |
| 29 | Vitaceae        | 1  | 1 |
| 30 | Buxaceae        | 1  | 1 |

**Group D.** Number of families without plants with anti-diabetic potential (42 families).

|    | <b>Family</b>    | <b>Total number of species</b> | <b>Number of species with anti-diabetic potential</b> |
|----|------------------|--------------------------------|-------------------------------------------------------|
| 1  | Plantaginaceae   | 27                             | 0                                                     |
| 2  | Ranunculaceae    | 21                             | 0                                                     |
| 3  | Cyperaceae       | 19                             | 0                                                     |
| 4  | Crassulaceae     | 14                             | 0                                                     |
| 5  | Onagraceae       | 7                              | 0                                                     |
| 6  | Orchidaceae      | 6                              | 0                                                     |
| 7  | Orobanchaceae    | 8                              | 0                                                     |
| 8  | Liliaceae        | 8                              | 0                                                     |
| 9  | Salicaceae       | 7                              | 0                                                     |
| 10 | Aspleniaceae     | 6                              | 0                                                     |
| 11 | Euphorbiaceae    | 5                              | 0                                                     |
| 12 | Plumbaginaceae   | 5                              | 0                                                     |
| 13 | Resedaceae       | 5                              | 0                                                     |
| 14 | Saxifragaceae    | 5                              | 0                                                     |
| 15 | Violaceae        | 5                              | 0                                                     |
| 16 | Iridaceae        | 4                              | 0                                                     |
| 17 | Woodsiaceae      | 4                              | 0                                                     |
| 18 | Santalaceae      | 3                              | 0                                                     |
| 19 | Apocynaceae      | 2                              | 0                                                     |
| 20 | Araliaceae       | 2                              | 0                                                     |
| 21 | Paeoniaceae      | 2                              | 0                                                     |
| 22 | Typhaceae        | 2                              | 0                                                     |
| 23 | Valerianaceae    | 2                              | 0                                                     |
| 24 | Xanthorrhoeaceae | 2                              | 0                                                     |
| 25 | Colchicaceae     | 1                              | 0                                                     |
| 26 | Commelinaceae    | 1                              | 0                                                     |
| 27 | Dennstaedtiaceae | 1                              | 0                                                     |
| 28 | Droseraceae      | 1                              | 0                                                     |

|           |                  |   |   |
|-----------|------------------|---|---|
| <b>29</b> | Elatinaceae      | 1 | 0 |
| <b>30</b> | Haloragaceae     | 1 | 0 |
| <b>31</b> | Melanthiaceae    | 1 | 0 |
| <b>32</b> | Menyanthaceae    | 1 | 0 |
| <b>33</b> | Potamogetonaceae | 1 | 0 |
| <b>34</b> | Proteaceae       | 1 | 0 |
| <b>35</b> | Rhamnaceae       | 1 | 0 |
| <b>36</b> | Sapindaceae      | 1 | 0 |
| <b>37</b> | Osmundaceae      | 1 | 0 |
| <b>38</b> | Alismataceae     | 1 | 0 |
| <b>39</b> | Aquifoliaceae    | 1 | 0 |
| <b>40</b> | Araceae          | 1 | 0 |
| <b>41</b> | Aristolochiaceae | 1 | 0 |
| <b>42</b> | Blechnaceae      | 1 | 0 |
